# Supplementary material for: Synergistic meso-β regulation of porphyrins: squeezing the band gap into the near-infrared I/II region
Source: Royal Society of Chemistry journal article supplement (doi:10.1039/d4sc01806k), 2024-01-01
Supplement: d4sc01806k1.pdf [file d4sc01806k1.pdf]

## Supporting Information

### Synergistic meso- $\beta$ regulation of porphyrin: squeezing the band gap into near-infrared I/II Region

Chulin Qu<sup>1</sup>, Xinxin Gong<sup>1</sup>, Yufen Sun<sup>1</sup>, Hu Gao<sup>1</sup>, Fangjian Cai<sup>1</sup>, Yue Zhao<sup>1</sup>, Fan Wu<sup>1,2\*</sup> and Zhen Shen<sup>1\*</sup>.

<sup>1</sup>State Key Laboratory of Coordination Chemistry, Collaborative Innovation Center of Advanced Microstructures, School of Chemistry and Chemical Engineering, Nanjing University, Nanjing 210023, China.

<sup>2</sup>School of Chemistry and Materials Science, Nanjing Normal University, Nanjing 210023, China.

\*Corresponding Author(s): Fan Wu: wufan@nnu.edu.cn; Zhen Shen: zshen@nju.edu.cn

#### Contents

|                                                                               |           |
|-------------------------------------------------------------------------------|-----------|
| 1. Materials and methods.....                                                 | page. S2  |
| 2. Synthesis procedure and characterization data .....                        | page. S2  |
| 3. Mass spectra .....                                                         | page. S3  |
| 4. NMR spectra.....                                                           | page. S9  |
| 5. Stability monitored by UV-vis absorption spectroscopy .....                | page. S12 |
| 6. Additional photophysical data .....                                        | page. S13 |
| 7. X-ray diffraction analysis .....                                           | page. S19 |
| 8. NSD analysis of <b>Zn-TNP</b> and <b>Pt-TNP</b> .....                      | page. S20 |
| 9. Photothermal studies .....                                                 | page. S21 |
| 10. Singlet oxygen generation of <b>Zn-TNP</b> and <b>Pt-TNP</b> .....        | page. S24 |
| 11. DFT calculations.....                                                     | page. S25 |
| 12. TD-DFT calculations .....                                                 | page. S34 |
| 13. TD-DFT calculations including spin-orbit coupling of excited states ..... | page. S41 |
| 14. Hole-electron distribution of <b>Zn-TNP</b> and <b>Pt-TNP</b> .....       | page. S45 |
| 15. NICS values.....                                                          | page. S46 |
| 16. ACID plots.....                                                           | page. S46 |
| 17. GIMIC .....                                                               | page. S47 |
| 18. Electrostatic potential maps.....                                         | page. S48 |
| 19. Cartesian Coordinates of optimized structures .....                       | page. S49 |
| 20. References .....                                                          | page. S88 |

## 1. Materials and methods

All reagents and solvents were commercial reagent grade and used without further purification. HR-ESI-MS data were recorded on a Thermo Scientific Q Exactive MS using a positive ion mode. MALDI-TOF MS data were measured on a Bruker Daltonics autoflex II spectrometer. The NMR spectra were measured on a Bruker AVANCE III HD-400 at 298 K. X-ray diffraction data were collected on a Bruker D8 Venture with  $\text{GaK}\alpha$  radiation ( $\lambda = 1.34139 \text{ \AA}$ ) at 190(2) K. UV-visible-NIR absorption spectra were measured on a Shimadzu UV-2500 spectrophotometer. MCD spectra were measured on a JASCO J-810 spectrometer producing a magnetic field of up to 1.50 T with both parallel and antiparallel fields. Fluorescence spectra were obtained using a FluoroLog-UltraFast (HORIBA Instrument Inc, Edison). Phosphorescence spectra were obtained using FLS 980-STM. The thermal images were recorded by an IR-thermal camera (FLIR ONE PRO).

**Theoretical calculations:** The theoretical calculations were carried out using the Gaussian 09 program<sup>1</sup>. Geometry optimizations and excited-state transitions were performed using density functional theory (DFT) and time-dependent DFT (TD-DFT) at the level of B3LYP/6-31G(d,p) (for C, N, Si, F, O, H) + SDD (for metal ions). The triisopropylsilylethynyl was replaced by trimethylsilylethynyl in the theoretical calculations. NICS values<sup>2</sup> were obtained by GIAO method. The ICSS surface was obtained based on the calculated NICS values of around 125000 points for each molecule and visualized by Multiwfn<sup>2-4</sup>. The hole and electron distributions were obtained by Multiwfn and visualized by VMD program<sup>3, 5, 6</sup>. The ESP surface was plotted by VMD program based on the data outputted by Multiwfn<sup>3, 6</sup>. Anisotropy of the induced current density (ACID) plots were calculated using the software package developed by Prof. R. Herges<sup>7</sup>. Magnetically induced current densities were calculated using the GIMIC program<sup>8-10</sup>. The spin-orbit coupling (SOC) matrix elements were obtained using TD-DFT calculations in Orca 5.0.3<sup>11, 12</sup>. The B3LYP functional with the Def2-TZVP basis was used, and the relativistic corrections were performed for the heavy-atom contained system using the Zero-Order Regular Approximation (ZORA).

## 2. Synthesis procedure and characterization data

Synthesis of **Zn-3**: **3** (24 mg, 0.015 mmol) was added to  $\text{CHCl}_3$  (20 mL) in a 50 mL round-bottom flask.  $\text{Zn}(\text{OAc})_2 \cdot 2\text{H}_2\text{O}$  (32.9 mg, 0.15 mmol) was dissolved in MeOH (10 mL) and poured into the  $\text{CHCl}_3$  solution of **3**. Then the reaction mixture was stirring for 3 h. The  $\text{CHCl}_3$  was removed under reduced pressure and reaction mixture was washed by brine to remove excess  $\text{Zn}(\text{OAc})_2 \cdot 2\text{H}_2\text{O}$ . The residue was purified on silica gel chromatography using  $\text{CH}_2\text{Cl}_2/\text{n-hexane}$  (7:3, v/v) as eluents, and the green fraction was collected and subsequent recrystallization from  $\text{CH}_2\text{Cl}_2/\text{CH}_3\text{OH}$  was to afford pure **Zn-3** (22.5 mg, 0.014 mmol, 93%) as green solid.  $^1\text{H NMR}$  (400 MHz,  $\text{CDCl}_3$ ):  $\delta$  7.68 (m, 2H), 7.50–7.45 (m, 2H), 7.43–7.36 (m, 4H), 7.17 (m, 2H), 7.12 (s, 2H), 7.02–6.95 (m, 8H), 6.92 (s, 4H), 2.73–2.54 (m, 6H), 2.32–2.15 (m, 10H), 1.80–1.67 (m, 12H), 1.59–1.49 (m, 72H). UV-vis ( $\text{CH}_2\text{Cl}_2$ ):  $\lambda_{\text{max}}$  ( $\epsilon \cdot \text{M}^{-1} \cdot \text{cm}^{-1}$ ) = 482 (219300), 618 (12800), 666 (10000); HR-MS (ESI): m/z calcd. For  $\text{C}_{104}\text{H}_{124}\text{ZnN}_4\text{Si}_4$ : 1604.8189; found: 1604.8138  $[\text{M}]^+$ . MALDI-TOF MS: m/z calcd for  $\text{C}_{96}\text{H}_{108}\text{ZnN}_4\text{Si}_4$ : 1492.694; found: 1492.778  $[\text{M}-4\text{C}_2\text{H}_4]^+$ .

Synthesis of **Zn-TNP**: **Zn-3** (23 mg, 0.014 mmol) was heated at 300 °C under vacuum (2 mm Hg) for 30 min and turned into quantitative **Zn-TNP** (21 mg, 0.014 mmol).  $^1\text{H NMR}$  (400 MHz,  $\text{CDCl}_3$ ):  $\delta$  10.90 (s, 8H), 8.41 (m, 8H), 7.75 (m, 8H), 1.72 (m, 12H), 1.45 (m, 72H). UV-vis ( $\text{CH}_2\text{Cl}_2$ ):  $\lambda_{\text{max}}$  ( $\epsilon \cdot \text{M}^{-1} \cdot \text{cm}^{-1}$ )

= 541 (135900), 732 (5940), 807 (34400); HR-MS (ESI):  $m/z$  calcd. For  $C_96H_{108}ZnN_4Si_4$ : 1492.6937; found: 1492.6921  $[M]^+$ . MALDI-TOF MS:  $m/z$  calcd for  $C_96H_{108}ZnN_4Si_4$ : 1492.694; found: 1492.845  $[M]^+$ .

Synthesis of **Pt-3: 3** (24 mg, 0.015 mmol),  $CH_3COONa$  (123 mg, 1.5 mmol) and  $PtCl_2$  (8 mg, 0.03 mmol) were added to acetic acid (30 mL) in a 50 mL round-bottom flask. The mixture was refluxed at 118 °C for 24 h under nitrogen atmosphere. The reaction was quenched with  $H_2O$  (10 mL). Subsequently, the reaction mixture was washed twice with water and three times with saturated  $NaHCO_3$  solution, dried with anhydrous  $Na_2SO_4$ . The solvent was removed under reduced pressure and the residue was purified on silica gel chromatography using  $CH_2Cl_2/n$ -hexane (1:9, v/v) as eluents. The green fraction was collected and subsequent recrystallization from  $CH_2Cl_2/CH_3OH$  was to afford pure **Pt-3** (24.3 mg, 0.014 mmol, 93%) as green solid.  $^1H$  NMR (400 MHz,  $CDCl_3$ ):  $\delta$  7.62 (m, 2H), 7.52–7.40 (m, 6H), 7.17 (m, 2H), 7.06 (m, 6H), 6.93 (s, 2H), 6.82 (m, 6H), 2.55–2.37 (m, 6H), 2.14 (m, 10H), 1.67 (m, 12H), 1.47 (m, 72H). UV-vis ( $CH_2Cl_2$ ):  $\lambda_{max}$  ( $\epsilon \cdot M^{-1} \cdot cm^{-1}$ ) = 464 (201200), 583 (21400); HR-MS (ESI):  $m/z$  calcd. For  $C_{104}H_{124}PtN_4Si_4$ : 1734.8524; found: 1734.8494.  $[M]^+$  MALDI-TOF MS:  $m/z$  calcd for  $C_96H_{108}PtN_4Si_4$ : 1623.730; found: 1623.358  $[M-4C_2H_4]^+$ .

Synthesis of **Pt-TNP: Pt-3** (24.3 mg, 0.014 mmol) was heated at 300 °C under vacuum (2 mm Hg) for 30 min and turned into quantitative **Pt-TNP** (22.7 mg, 0.014 mmol).  $^1H$  NMR (400 MHz, Toluene- $d_8$ ):  $\delta$  11.17 (s, 8H), 8.66–8.64 (m, 8H), 7.65–7.62 (m, 8H), 1.67–1.61 (m, 12H), 1.46–1.44 (m, 72H). UV-vis ( $CH_2Cl_2$ ):  $\lambda_{max}$  ( $\epsilon \cdot M^{-1} \cdot cm^{-1}$ ) = 516 (125500), 717 (15700), 789 (72400); HR-MS (ESI):  $m/z$  calcd. For  $C_96H_{108}PtN_4Si_4$ : 1622.7224; found: 1622.7272.  $[M]^+$  MALDI-TOF MS:  $m/z$  calcd for  $C_96H_{108}PtN_4Si_4$ : 1623.730; found: 1623.290  $[M]^+$ .

### 3. Mass spectra



Figure S1. HR-ESI-MS spectrum of **3**.



Figure S2. HR-ESI-MS spectrum of Zn-3.



Figure S3. HR-ESI-MS spectrum of Zn-TNP.



Figure S4. HR-ESI-MS spectrum of Pt-3.



Figure S5. HR-ESI-MS spectrum of Pt-TNP.



**Figure S6.** MALDI-TOF mass spectrum of **3**.



**Figure S7.** MALDI-TOF mass spectrum of **Zn-3**.



**Figure S8.** MALDI-TOF mass spectrum of **Zn-TNP**.



**Figure S9.** MALDI-TOF mass spectrum of **Pt-3**.



Figure S10. MALDI-TOF mass spectrum of **Pt-TNP**.



Figure S11. MALDI-TOF mass spectrum of the partially photodegraded **Zn-TNP** under ambient light. Inset: the structure of the proposed product after photo-oxidation.



#### 4. NMR spectra



Figure S12. <sup>1</sup>H NMR spectrum of Zn-3 in CDCl<sub>3</sub>.



Figure S13. <sup>1</sup>H NMR spectrum of Zn-TNP in CDCl<sub>3</sub>.



Figure S14.  $^{13}\text{C}$  NMR spectrum of Zn-TNP in  $\text{CDCl}_3$ .



Figure S15.  $^1\text{H}$  NMR spectrum of Pt-3 in  $\text{CDCl}_3$ .



Figure S16.  $^1\text{H}$  NMR spectrum of Pt-TNP in toluene- $d_8$ .

## 5. Stability monitored by UV-vis absorption spectroscopy



**Figure S17.** Time course of the absorbance change of **Pt-TNP** in toluene monitored by UV-vis-NIR spectroscopy under ambient conditions.



**Figure S18.** (a) The photothermal stability of **Zn-TNP** in toluene solution under the laser irradiation (808 nm, 0.3 W cm<sup>-2</sup>). (b) Time course of the absorbance change of **Zn-TNP** in toluene under ambient light monitored by UV-vis-NIR spectroscopy. (c) Time course of the absorbance change of **Zn-TNP** in toluene in a dark environment monitored by UV-vis-NIR spectroscopy.



**Figure S19.** The experimental (up) and simulated (down) absorption spectra of **Zn-TNP-O<sub>2</sub>** (FWHM= 3000 cm<sup>-1</sup>), along with the TD-DFT calculated electronic transitions (blue bars).

## 6. Additional photophysical data



**Figure S20.** Absorption spectrum of **3** obtained in toluene (3 mL, 1\*10<sup>-5</sup> mol/L).



**Figure S21.** Absorption spectrum of **Zn-3** obtained in toluene (3 mL,  $1 \cdot 10^{-5}$  mol/L).



**Figure S22.** Absorption spectrum of **Pt-3** obtained in toluene (3 mL,  $1 \cdot 10^{-5}$  mol/L)



**Figure S23.** Absorption spectrum of **Zn-TNP** obtained in toluene (3 mL,  $1 \cdot 10^{-5}$  mol/L).



**Figure S24.** Absorption spectrum of **Pt-TNP** obtained in toluene (3 mL,  $1 \cdot 10^{-5}$  mol/L).



**Figure S25.** Fluorescent emission spectrum of **3** obtained in toluene (3 mL,  $1 \times 10^{-5}$  mol/L) at room temperature with the excitation wavelength of the Soret band ( $\lambda_{\text{ex}} = 476$  nm).



**Figure S26.** Fluorescent emission spectrum of **Zn-3** obtained in toluene (3 mL,  $1 \times 10^{-5}$  mol/L) at room temperature with the excitation wavelength of the Soret band ( $\lambda_{\text{ex}} = 487$  nm).





**Figure S27.** Phosphorescent emission spectrum of **Pt-3** obtained in toluene (3 mL,  $1 \cdot 10^{-5}$  mol/L) at room temperature with the excitation wavelength of the Soret band ( $\lambda_{\text{ex}} = 466$  nm).



**Figure S28.** Fluorescent emission spectrum of **Zn-TNP** obtained in toluene (3 mL,  $1 \cdot 10^{-5}$  mol/L) at room temperature with the excitation wavelength of the Soret band ( $\lambda_{\text{ex}} = 549$  nm).



**Figure S29.** Phosphorescent emission spectrum of **Pt-TNP** obtained in toluene (3 mL,  $1 \cdot 10^{-5}$  mol/L) at room temperature with the excitation wavelength of the Soret band ( $\lambda_{\text{ex}} = 520$  nm).

**Table S1. Photophysical properties of compounds in toluene.**

| Species                   | Q1(Soret) [nm] | $\lambda_{\text{max}}^{\text{em}}$ [nm] | $\Phi_{\text{n}}^{\text{c}}$ | $\Phi_{\text{pl}}$ | $\tau$                                     |
|---------------------------|----------------|-----------------------------------------|------------------------------|--------------------|--------------------------------------------|
| <b>3<sup>a</sup></b>      | 729 (476)      | 742, 825                                | 0.0245                       | -                  | 5.54 ns                                    |
| <b>Zn-3<sup>a</sup></b>   | 669 (487)      | 679, 746                                | 0.0192                       | -                  | 1.42 ns                                    |
| <b>Pt-3<sup>b</sup></b>   | 628 (466)      | 823, 930                                | -                            | - <sup>d</sup>     | 1.5 $\mu\text{s}^*$ , 11.6 $\mu\text{s}^*$ |
| <b>Zn-TNP<sup>a</sup></b> | 816 (549)      | 847                                     | 0.0093                       | -                  | 2.03 ns                                    |
| <b>Pt-TNP<sup>b</sup></b> | 792 (520)      | 1106                                    | -                            | - <sup>d</sup>     | 13.8 $\mu\text{s}^*$                       |

a. in toluene under atmospheric conditions at room temperature. b. in toluene after  $\text{N}_2$  deaeration at room temperature. c. Absolute quantum yield. d. Reliable data was not obtained due to the low quantum yield. \*. The data is obtained by FLS 980-STM.

## 7. X-ray diffraction analysis

**Table S2.** Crystallographic data of **Zn-TNP** and **Pt-TNP**.

| Compound                      | <b>Zn-TNP</b>               | <b>Pt-TNP</b>            |
|-------------------------------|-----------------------------|--------------------------|
| CCDC.NO.                      | 2325275                     | 2265412                  |
| Formula                       | $C_{104}H_{128}ClN_5Si_4Zn$ | $C_{96}H_{108}N_4PtSi_4$ |
| Formula weight                | 1661.29                     | 1625.31                  |
| Radiation                     | GaK $\alpha$                | GaK $\alpha$             |
| Temperature[K]                | 193                         | 193                      |
| Crystal System                | Triclinic                   | Tetragonal               |
| Space Group                   | P -1                        | I4 <sub>1</sub> /a       |
| a [Å]                         | 16.0410(10)                 | 19.3505(3)               |
| b [Å]                         | 17.7484(11)                 | 19.3505(3)               |
| c [Å]                         | 19.0998(12)                 | 21.7466(5)               |
| $\alpha$ [deg]                | 107.001(3)                  | 90                       |
| $\beta$ [deg]                 | 106.988(3)                  | 90                       |
| $\gamma$ [deg]                | 94.445(3)                   | 90                       |
| V [Å <sup>3</sup> ]           | 4893.7(5)                   | 8142.8(3)                |
| Z                             | 2                           | 4                        |
| $\rho$ [gcm <sup>-3</sup> ]   | 1.127                       | 1.326                    |
| $\mu$ [mm <sup>-1</sup> ]     | 0.928                       | 2.824                    |
| F(000)                        | 1780.0                      | 3384.0                   |
| Reflections collected/ unique | 53920/17849                 | 51232/4536               |
| R <sub>1</sub>                | 0.1177                      | 0.0207                   |
| wR <sub>2</sub>               | 0.3321                      | 0.0546                   |
| GOF                           | 1.051                       | 1.054                    |

## 8. NSD analysis of Zn-TNP and Pt-TNP

**Table S3.** Summary of the **Zn-TNP** NSD (in Å).

| basis | $\Delta_{ip}$  | $\delta_{ip}$  | B <sub>2g</sub> | B <sub>1g</sub> | E <sub>u</sub> (x) | E <sub>u</sub> (y) | A <sub>1g</sub> | A <sub>2g</sub> |
|-------|----------------|----------------|-----------------|-----------------|--------------------|--------------------|-----------------|-----------------|
| min.  | 0.29           | 0.01           | -0.02           | -0.26           | 0.06               | 0.00               | 0.10            | 0.00            |
| ext.  | 0.29           | 0.01           | -0.02           | -0.26           | 0.06               | 0.00               | 0.10            | 0.00            |
|       |                |                | 0.00            | -0.04           | 0.01               | 0.00               | -0.04           | -0.01           |
| total | 0.34           | 0.00           | -0.02           | -0.26           | 0.06               | 0.00               | 0.11            | 0.00            |
|       |                |                | 0.01            | -0.04           | 0.01               | 0.00               | -0.04           | -0.01           |
|       |                |                | 0.00            | 0.06            | 0.00               | 0.01               | 0.12            | 0.01            |
|       |                |                | 0.00            | -0.02           | -0.03              | 0.00               | 0.08            | 0.01            |
|       |                |                | -0.01           | -0.03           | -0.04              | -0.01              | 0.01            | 0.00            |
|       |                |                | 0.02            | 0.01            | -0.01              | 0.00               | -0.04           |                 |
|       |                |                |                 |                 | 0.01               | 0.00               |                 |                 |
|       |                |                |                 |                 | 0.01               | -0.01              |                 |                 |
|       |                |                |                 |                 | 0.01               | 0.00               |                 |                 |
|       |                |                |                 |                 | 0.00               | 0.00               |                 |                 |
|       |                |                |                 |                 | 0.00               | 0.00               |                 |                 |
| comp. | 0.34           | 0.00           | 0.03            | 0.27            | 0.08               | 0.02               | 0.19            | 0.02            |
| basis | $\Delta_{oop}$ | $\delta_{oop}$ | B <sub>2u</sub> | B <sub>1u</sub> | E <sub>g</sub> (x) | E <sub>g</sub> (y) | A <sub>1u</sub> | A <sub>2u</sub> |
| min.  | 1.92           | 0.01           | -1.89           | 0.03            | -0.10              | -0.23              | 0.00            | -0.28           |
| ext.  | 1.93           | 0.00           | -1.88           | 0.03            | -0.10              | -0.23              | 0.00            | -0.27           |
|       |                |                | 0.09            | 0.01            | -0.01              | 0.04               | -0.01           | 0.20            |
| total | 1.93           | 0.00           | -1.88           | 0.03            | -0.10              | -0.23              | 0.00            | -0.27           |
|       |                |                | 0.09            | 0.01            | -0.01              | 0.04               | -0.01           | 0.20            |
|       |                |                | 0.01            | -0.01           | 0.00               | -0.03              |                 | -0.04           |
|       |                |                |                 |                 | 0.00               | 0.01               |                 |                 |
|       |                |                |                 |                 | -0.01              | -0.01              |                 |                 |
| comp. | 1.93           | 0.00           | 1.89            | 0.03            | 0.10               | 0.23               | 0.01            | 0.34            |

**Table S4.** Summary of the **Pt-TNP** NSD (in Å).

| basis | $\Delta_{ip}$ | $\delta_{ip}$ | B <sub>2g</sub> | B <sub>1g</sub> | E <sub>u</sub> (x) | E <sub>u</sub> (y) | A <sub>1g</sub> | A <sub>2g</sub> |
|-------|---------------|---------------|-----------------|-----------------|--------------------|--------------------|-----------------|-----------------|
| min.  | 0.33          | 0.02          | 0.00            | 0.00            | 0.00               | 0.00               | -0.33           | -0.01           |
| ext.  | 0.41          | 0.01          | 0.00            | 0.00            | 0.00               | 0.00               | -0.33           | -0.02           |
|       |               |               | 0.00            | 0.00            | 0.00               | 0.00               | -0.05           | -0.23           |
| total | 0.45          | 0.00          | 0.00            | 0.00            | 0.00               | 0.00               | -0.32           | -0.02           |
|       |               |               | 0.00            | 0.00            | 0.00               | 0.00               | -0.05           | -0.23           |
|       |               |               | 0.00            | 0.00            | 0.00               | 0.00               | 0.18            | 0.03            |
|       |               |               | 0.00            | 0.00            | 0.00               | 0.00               | 0.07            | -0.01           |
|       |               |               | 0.00            | 0.00            | 0.00               | 0.00               | -0.01           | -0.05           |

|       |                |                |          |          |          |          |          |          |
|-------|----------------|----------------|----------|----------|----------|----------|----------|----------|
|       |                |                | 0.00     | 0.00     | 0.00     | 0.00     | 0.00     | 0.00     |
|       |                |                |          |          | 0.00     | 0.00     |          |          |
|       |                |                |          |          | 0.00     | 0.00     |          |          |
|       |                |                |          |          | 0.00     | 0.00     |          |          |
|       |                |                |          |          | 0.00     | 0.00     |          |          |
|       |                |                |          |          | 0.00     | 0.00     |          |          |
| comp. | 0.45           | 0.00           | 0.00     | 0.00     | 0.00     | 0.00     | 0.38     | 0.24     |
| basis | $\Delta_{oop}$ | $\delta_{oop}$ | $B_{2u}$ | $B_{1u}$ | $E_g(x)$ | $E_g(y)$ | $A_{1u}$ | $A_{2u}$ |
| min.  | 2.83           | 0.00           | 2.59     | -1.15    | 0.00     | 0.00     | 0.00     | 0.00     |
| ext.  | 2.83           | 0.00           | 2.59     | -1.15    | 0.00     | 0.00     | 0.00     | 0.00     |
|       |                |                | -0.02    | -0.02    | 0.00     | 0.00     | 0.00     | 0.00     |
| total | 2.83           | 0.00           | 2.59     | -1.15    | 0.00     | 0.00     | 0.00     | 0.00     |
|       |                |                | -0.02    | -0.02    | 0.00     | 0.00     | 0.00     | 0.00     |
|       |                |                | -0.02    | -0.04    | 0.00     | 0.00     |          | 0.00     |
|       |                |                |          |          | 0.00     | 0.00     |          |          |
|       |                |                |          |          | 0.00     | 0.00     |          |          |
| comp. | 2.83           | 0.00           | 2.59     | 1.15     | 0.00     | 0.00     | 0.00     | 0.00     |

## 9. Photothermal studies

**Photothermal effect tests:** The toluene solution (30  $\mu\text{M}$ , 0.7 mL) of **Pt-TNP** in a polypropylene tube was exposed to 808 nm laser irradiation at 0.35  $\text{W}\cdot\text{cm}^{-2}$  power densities for total 20 min. An IR-thermal camera was utilized to record the temperature of solutions every 30 s and the thermal images were also monitored and collected during irradiation. The photothermal conversion efficiency ( $\eta$ ) of the **Pt-TNP** was calculated according to the reported method<sup>13, 14</sup>. Under continuous laser irradiation, the temperature of the **Pt-TNP** solution was recorded, until the solution had reached a steady-state temperature at 6.5 min. The photothermal conversion efficiency ( $\eta$ ) was calculated according to Equation (1):

$$\eta = \frac{hA(T_{Max} - T_{Surr})}{I(1 - 10^{-A_{808}})} - Q_{Dis} \quad (1)$$

Where h represents the heat transfer coefficient, A is the surface area of the container,  $T_{Max}$  represents the maximum steady-state temperature,  $T_{Surr}$  is the ambient temperature of the environment,  $Q_{Dis}$  represents the heat dissipation from the light absorbed by the solvent and tube, I is the incident laser power, and  $A_{808}$  is the absorbance of the sample at 808 nm. The value of  $\tau_s$  is derived from Equation (2)

$$t = -\tau_s \ln(\theta) = -\tau_s \ln\left(\frac{T_t - T_{Surr}}{T_{Max} - T_{Surr}}\right) \quad (2)$$

Where t is the cooling time points after continuous irradiation,  $\tau_s$  is the time constant for heat transfer of the system,  $T_t$  is the temperature at the corresponding time points during the cooling process. The value of hA is derived from Equation (3).

$$\tau_s = \frac{m_D c_D}{hA} \quad (3)$$

Where  $m_D$  and  $c_D$  are the mass (0.61 g) and specific heat capacity (1.68 J/g °C), respectively, of toluene.  $Q_{Dis}$  represents the heat dissipation from the light absorbed by the toluene and the container, so  $Q_{Dis}$  was calculated according to Equation (4)

$$Q_{Dis} = \frac{m_D c_D}{\tau_s(\text{toluene})} (T_{Max}(\text{toluene}) - T_{Surr}) \quad (4)$$



**Figure S30.** Photothermal stability of Pt-TNP (30  $\mu\text{M}$ ) in 0.7 mL toluene before and after the irradiation of 808 nm and 0.35  $\text{W cm}^{-2}$ .



**Figure S31.** Photothermal conversion behavior of Pt-TNP (30  $\mu\text{M}$ ) in 0.7 mL toluene and toluene solution (0.7 mL) under the irradiation of 808 nm and 0.35  $\text{W cm}^{-2}$ .



**Figure S32.** A plot of time versus  $-\ln(\theta)$  during the cooling period for **Pt-TNP** in toluene solution (0.7 mL).



**Figure S33.** The photothermal stability of **Zn-TNP** in toluene solution (30  $\mu$ M) under the irradiation of 808 nm and 0.35  $W\ cm^{-2}$ .

## 10. Singlet oxygen generation of Zn-TNP and Pt-TNP determined by DPBF



**Figure S34.** Singlet oxygen generation of **Pt-TNP** obtained in toluene at room temperature under 808 nm ( $10 \text{ mW cm}^{-2}$ ) laser irradiation.



**Figure S35.** Singlet oxygen generation of **Zn-TNP** obtained in toluene at room temperature under 808 nm ( $10 \text{ mW cm}^{-2}$ ) laser irradiation.





**Figure S36.** The stability of **Zn-TNP** and **Pt-TNP** measured by the ratio of absorption at 808 nm under 808 nm ( $10 \text{ mW cm}^{-2}$ ) laser irradiation.

### 11. DFT calculations



**Figure S37.** The optimized structures of a series of meso-free or  $\beta$ -free Zn- and Pt-porphyrins with highly planar conformations.



**Figure S38.** (a) Frontier molecular orbital diagrams of a series of planar Pt-porphyrins with various meso- and  $\beta$ -substituents. The HOMO-lifting effect of aromatic fusion and the LUMO-reducing effect of alkynyl substitution are highlighted with arrows. (b) The HOMO/LUMO energy and conformation changes after the gradual introduction of meso-alkynyl or  $\beta$ -naphthalene into the parent non-fused porphyrin.



**Figure S39.** Scheme of the molecular structures for DFT calculations.



**Figure S40.** (a) Molecular structures of Pt-porphyrins with meso-phenyl (**Pt-TPXTNP**) or meso-alkynyl (**Pt-AXTNP**) substituents. The electron-donating or electron-withdrawing groups **X** are incorporated into the meso-substituents. (b) Comparison of the HOMO-LUMO energy levels of **Pt-TPXTNP** and **Pt-AXTNP**. (c) The HOMO and LUMO orbital plots of **Pt-TPXTNP** and **Pt-AXTNP**. The  $\pi$ -electron density of the LUMOs in **Pt-AXTNP** extended to the alkyne units as shown in the red circle.



Figure S41. DFT calculated frontier molecular orbital diagrams of Pt-TTP.



Figure S42. DFT calculated frontier molecular orbital diagrams of Pt-TPTBP.



Figure S43. DFT calculated frontier molecular orbital diagrams of Pt-TPTNP.



Figure S44. DFT calculated frontier molecular orbital diagrams of Pt-TPTAP.



Figure S45. DFT calculated frontier molecular orbital diagrams of **Pt-P**.



Figure S46. DFT calculated frontier molecular orbital diagrams of **Pt-TBP**.



Figure S47. DFT calculated frontier molecular orbital diagrams of Pt-TNP.



Figure S48. The HOMO/HOMO-1 splitting and  $a_{1u}/a_{2u}$  symmetry switching from Pt-TPP to Pt-TPTNP.



Figure S49. DFT calculated frontier molecular orbital diagrams of Pt-TAP.



Figure S50. DFT calculated frontier molecular orbital diagrams of Pt-TPFTNP.





Figure S51. DFT calculated frontier molecular orbital diagrams of Pt-NTNP.



Figure S52. DFT calculated frontier molecular orbital diagrams of Zn-TNP.



**Figure S53.** (a) Molecular structures and frontier molecular orbital diagrams of *ruf*-Pt-TNP, *sad*-Zn-TNP and *ruf*-Zn-TNP. (b) TD-DFT simulated absorption spectra of *ruf*-Pt-TNP (black line), *sad*-Zn-TNP (blue line) and *ruf*-Zn-TNP (red line) (FWHM= 3000  $\text{cm}^{-1}$ ).

## 12. TD-DFT calculations

**Table S5.** The calculated wavelengths, oscillation strengths and major contributions of the Q bands of Pt-AXTNP.

| Compound         | Wavelength | Osc. strength | Major contribs.  |
|------------------|------------|---------------|------------------|
| <b>Pt-ANTNP</b>  | 688.83     | 0.1641        | HOMO->LUMO (81%) |
|                  | 688.76     | 0.1638        | HOMO->L+1 (81%)  |
| <b>Pt-TNP</b>    | 753.42     | 0.2453        | HOMO->LUMO (87%) |
|                  | 753.42     | 0.2453        | HOMO->L+1 (87%)  |
| <b>Pt-ATNP</b>   | 738.04     | 0.2817        | HOMO->L+1 (81%)  |
|                  | 738.04     | 0.2817        | HOMO->LUMO (81%) |
| <b>Pt-AFTNP</b>  | 779.72     | 0.3304        | HOMO->L+1 (93%)  |
|                  | 779.72     | 0.3304        | HOMO->LUMO (93%) |
| <b>Pt-ACNTNP</b> | 847.69     | 0.3005        | HOMO->LUMO (87%) |
|                  | 847.69     | 0.3005        | HOMO->L+1 (87%)  |



**Figure S54.** TD-DFT calculated electronic transitions and simulated absorption spectrum of **Pt-TTPP**.



**Figure S55.** TD-DFT calculated electronic transitions and simulated absorption spectrum of **Pt-TPTBP**.



**Figure S56.** TD-DFT calculated electronic transitions and simulated absorption spectrum of **Pt-TPTNP**.



**Figure S57.** TD-DFT calculated electronic transitions and simulated absorption spectrum of **Pt-TPTAP**.



**Figure S58.** TD-DFT calculated electronic transitions and simulated absorption spectrum of **Pt-P**.



**Figure S59.** TD-DFT calculated electronic transitions and simulated absorption spectrum of **Pt-TBP**.



**Figure S60.** TD-DFT calculated electronic transitions and simulated absorption spectrum of **Pt-TNP**.



**Figure S61.** TD-DFT calculated electronic transitions and simulated absorption spectrum of **Pt-TAP**.



**Figure S62.** TD-DFT calculated electronic transitions and simulated absorption spectrum of **Pt-TPFTNP**.



**Figure S63.** TD-DFT calculated electronic transitions and simulated absorption spectrum of **Pt-NTNP**.



**Figure S64** TD-DFT calculated electronic transitions and simulated absorption spectrum of **Zn-TNP**.

**Table S6.** TD-DFT calculated wavelengths, oscillator strengths and compositions of selected electronic transitions for **Pt-TNP**.

| No. | Wavelength [nm] | Osc. Strength | Major contributions                      |
|-----|-----------------|---------------|------------------------------------------|
| 1   | 753.42          | 0.2453        | HOMO -1->LUMO +1 (12%), HOMO->LUMO (87%) |
| 2   | 753.42          | 0.2453        | HOMO -1->LUMO (12%), HOMO->LUMO +1 (87%) |
| 3   | 495.93          | 1.02          | HOMO -1->LUMO (85%), HOMO->LUMO +1 (12%) |
| 4   | 495.93          | 1.02          | HOMO -1->LUMO +1 (85%), HOMO->LUMO (12%) |



### 13.. TD-DFT calculations including spin-orbit coupling of excited states



**Figure S65.** TD-DFT calculated singlet energy levels (from  $S_6$  to  $S_1$ ) and triplet energy levels (from  $T_6$  to  $T_1$ ) of Pt-TPP.



**Figure S66.** TD-DFT calculated singlet energy levels (from  $S_6$  to  $S_1$ ) and triplet energy levels (from  $T_6$  to  $T_1$ ) of Pt-TPTBP.



**Figure S67.** TD-DFT calculated singlet energy levels (from  $S_6$  to  $S_1$ ) and triplet energy levels (from  $T_6$  to  $T_1$ ) of **Pt-TPTNP**.



**Figure S68.** TD-DFT calculated singlet energy levels (from  $S_6$  to  $S_1$ ) and triplet energy levels (from  $T_6$  to  $T_1$ ) of **Pt-TPTAP**.



**Figure S69.** TD-DFT calculated singlet energy levels (from  $S_6$  to  $S_1$ ) and triplet energy levels (from  $T_6$  to  $T_1$ ) of **Pt-P**.



**Figure S70.** TD-DFT calculated singlet energy levels (from  $S_6$  to  $S_1$ ) and triplet energy levels (from  $T_6$  to  $T_1$ ) of **Pt-TBP**.



**Figure S71.** TD-DFT calculated singlet energy levels (from  $S_6$  to  $S_1$ ) and triplet energy levels (from  $T_6$  to  $T_1$ ) of Pt-TNP.



**Figure S72.** TD-DFT calculated singlet energy levels (from  $S_6$  to  $S_1$ ) and triplet energy levels (from  $T_6$  to  $T_1$ ) of Pt-TAP.

#### 14. Hole-electron distribution of Zn-TNP and Pt-TNP



**Figure S73.** Hole-electron distribution (isovalue = 0.001) of **Zn-TNP** in  $S_0-S_1$  transition.



**Figure S74.** Hole-electron distribution (isovalue = 0.001) of **Zn-TNP** in  $S_0-T_1$  transition.



**Figure S75.** Hole-electron distribution (isovalue = 0.001) of **Pt-TNP** in  $S_0-S_1$  transition.

## 15. NICS values



**Table S7.** NICS values of **Zn-TNP** and **Pt-TNP** at various positions calculated at the GIAO/B3LYP/6-31G(d,p) (for C, N, H, Si) + SDD (for Zn or Pt) levels of theory using the optimized structure.

| <i>Positions</i> | <b>Zn-TNP</b> | <b>Pt-TNP</b> |
|------------------|---------------|---------------|
| <i>1</i>         | -11.14        | -12.52        |
| <i>2</i>         | -1.75         | -1.69         |
| <i>3</i>         | -10.65        | -10.14        |
| <i>4</i>         | -9.22         | -9.01         |

## 16. ACID plots



**Figure S76.** ACID plots (isovalue = 0.03) of **Pt-TNP** and **Zn-TNP**.

## 17. GIMIC



**Figure S77.** GIMIC of **Zn-TNP** (The signed modulus of the current density shows diatropic ring current (blue, aromaticity) and paratropic ring current (red, antiaromaticity). isovalue = 0.05).



**Figure S78.** GIMIC of **Pt-TNP** (The signed modulus of the current density shows diatropic ring current (blue, aromaticity) and paratropic ring current (red, antiaromaticity). isovalue = 0.05).

## 18. Electrostatic potential maps



Figure S79. Electrostatic potential map of **Zn-TNP** (isovalue = 0.001).



Figure S80. Electrostatic potential map of **Pt-TNP** (isovalue = 0.001).



## 19. Cartesian Coordinates of optimized structures

**Table S8.** Coordinates of the optimized structure for **Pt-TPP** at the B3LYP/6-31G(d,p) (for C, N, H) + SDD (for Pt) level of theory.

| E(B3LYP) = -2032.068712             |             |             |             |      |             |             |             |
|-------------------------------------|-------------|-------------|-------------|------|-------------|-------------|-------------|
| Charge = 0, Multiplicity = 1        |             |             |             |      |             |             |             |
| Number of Imaginary Frequencies = 0 |             |             |             |      |             |             |             |
| Atom                                | x           | y           | z           | Atom | x           | y           | z           |
| C                                   | 2.86193173  | -1.10730477 | 0.01638708  | C    | -3.72875053 | -4.28183173 | -1.18107959 |
| C                                   | 4.23879980  | -0.67738015 | 0.07264249  | C    | -4.71694770 | -5.26735715 | -1.19427674 |
| C                                   | 4.23823393  | 0.68093127  | 0.07251291  | C    | -5.49721349 | -5.49422221 | -0.05889231 |
| C                                   | 2.86100703  | 1.10969228  | 0.01620661  | C    | -5.28414085 | -4.72936840 | 1.08954421  |
| N                                   | 2.04223502  | 0.00085458  | -0.00905215 | C    | -4.29667462 | -3.74312400 | 1.10239418  |
| C                                   | 2.44724290  | -2.44527331 | 0.01769511  | C    | 3.73233097  | -4.27879586 | 1.18102107  |
| C                                   | 2.44518894  | 2.44731241  | 0.01739812  | C    | 4.72137003  | -5.26346905 | 1.19417391  |
| C                                   | 1.10734836  | 2.86240891  | 0.00852057  | C    | 5.50185670  | -5.48958953 | 0.05878701  |
| C                                   | 0.67739300  | 4.24035935  | -0.00046189 | C    | 5.28815995  | -4.72484341 | -1.08959799 |
| C                                   | -0.68092011 | 4.23979833  | 0.00033735  | C    | 4.29984619  | -3.73944139 | -1.10240308 |
| C                                   | -1.10973493 | 2.86149341  | -0.00858091 | H    | 5.08876198  | -1.34099603 | 0.11896705  |
| N                                   | -0.00085699 | 2.04232851  | -0.00002428 | H    | 5.08763930  | 1.34527056  | 0.11870557  |
| C                                   | -2.44722716 | 2.44526848  | -0.01737921 | H    | 1.34083795  | 5.09167117  | -0.00411662 |
| C                                   | -2.86191553 | 1.10729954  | -0.01607919 | H    | -1.34506911 | 5.09056205  | 0.00396251  |
| C                                   | -4.23879187 | 0.67739193  | -0.07221715 | H    | -5.08875588 | 1.34101984  | -0.11833702 |
| C                                   | -4.23823316 | -0.68091978 | -0.07232325 | H    | -5.08765201 | -1.34524059 | -0.11854291 |
| C                                   | -2.86100495 | -1.10969756 | -0.01623801 | H    | -1.34082730 | -5.09166573 | 0.00370014  |
| N                                   | -2.04222103 | -0.00086248 | 0.00911622  | H    | 1.34509070  | -5.09055645 | -0.00396036 |
| C                                   | -2.44517975 | -2.44731563 | -0.01764882 | H    | 3.12593039  | 4.10359061  | 2.06602291  |
| C                                   | -1.10733528 | -2.86240719 | -0.00873427 | H    | 4.87921266  | 5.85536642  | 2.09243391  |
| C                                   | -0.67737675 | -4.24035742 | 0.00020975  | H    | 6.26596055  | 6.26158468  | 0.06775391  |
| C                                   | 0.68093655  | -4.23979631 | -0.00037720 | H    | 5.88397766  | 4.90154576  | -1.97961646 |
| C                                   | 1.10974769  | -2.86149313 | 0.00869496  | H    | 4.12892118  | 3.15130841  | -1.99838446 |
| N                                   | 0.00087346  | -2.04232722 | 0.00000748  | H    | -4.13146440 | 3.14801149  | 1.99844690  |
| C                                   | 3.50570343  | 3.50694862  | 0.03196714  | H    | -5.88808037 | 4.89668035  | 1.97957228  |
| C                                   | 3.50864620  | -3.50401178 | 0.03248779  | H    | -6.27136573 | 6.25616315  | -0.06792402 |
| C                                   | -3.50570870 | -3.50693283 | -0.03250169 | H    | -4.88433985 | 5.85097309  | -2.09261993 |
| C                                   | -3.50864397 | 3.50400087  | -0.03196377 | H    | -3.12950112 | 4.10075725  | -2.06610478 |
| Pt                                  | 0.00000626  | -0.00000221 | 0.00001070  | H    | -3.12557598 | -4.10339659 | -2.06654945 |
| C                                   | 3.72893853  | 4.28196882  | 1.18042617  | H    | -4.87888601 | -5.85510861 | -2.09346175 |
| C                                   | 4.71711494  | 5.26751437  | 1.19334360  | H    | -6.26602818 | -6.26150128 | -0.06906488 |
| C                                   | 5.49717015  | 5.49427804  | 0.05779128  | H    | -5.88435152 | -4.90171603 | 1.97851832  |
| C                                   | 5.28392282  | 4.72929072  | -1.09051931 | H    | -4.12925640 | -3.15152137 | 1.99778891  |
| C                                   | 4.29647385  | 3.74302088  | -1.10308969 | H    | 3.12899580  | -4.10090585 | 2.06649290  |
| C                                   | -4.29957410 | 3.73948899  | 1.10310088  | H    | 4.88381669  | -5.85113597 | 2.09332212  |
| C                                   | -5.28790272 | 4.72487665  | 1.09047060  | H    | 6.27132689  | -6.25621194 | 0.06894095  |
| C                                   | -5.50188316 | 5.48955132  | -0.05791151 | H    | 5.88854499  | -4.89659883 | -1.97856898 |

|   |             |            |             |   |            |             |             |
|---|-------------|------------|-------------|---|------------|-------------|-------------|
| C | -4.72167147 | 5.26336696 | -1.19347207 | H | 4.13195426 | -3.14791400 | -1.99775648 |
| C | -3.73261926 | 4.27870101 | -1.18049613 |   |            |             |             |

**Table S9.** Coordinates of the optimized structure for **Pt-TPTBP** at the B3LYP/6-31G(d,p) (for C, N, H) + SDD (for Pt) level of theory.

| E(B3LYP) = -2646.628454             |             |             |             |      |             |             |             |
|-------------------------------------|-------------|-------------|-------------|------|-------------|-------------|-------------|
| Charge = 0, Multiplicity = 1        |             |             |             |      |             |             |             |
| Number of Imaginary Frequencies = 0 |             |             |             |      |             |             |             |
| Atom                                | x           | y           | z           | Atom | x           | y           | z           |
| C                                   | 2.99711311  | -0.34834558 | 0.37654720  | C    | -3.83011492 | -6.72089572 | 0.02621371  |
| C                                   | 4.11772802  | 0.38989712  | 0.95308521  | C    | -2.84246992 | -6.47115438 | 0.98210385  |
| C                                   | 3.74359574  | 1.75397798  | 0.95939204  | C    | -2.14937940 | -5.25994684 | 0.97294900  |
| C                                   | 2.40259797  | 1.82277077  | 0.38484594  | C    | 5.26041916  | -2.14941636 | -0.97223990 |
| N                                   | 1.96223902  | 0.53605611  | 0.15436782  | C    | 6.47154882  | -2.84263348 | -0.98101851 |
| C                                   | 2.97673091  | -1.69854321 | -0.00721580 | C    | 6.72072723  | -3.83059687 | -0.02530958 |
| C                                   | 1.69858930  | 2.97676268  | 0.00708974  | C    | 5.75067897  | -4.12460963 | 0.93593682  |
| C                                   | 0.34832154  | 2.99713831  | -0.37644511 | C    | 4.53633320  | -3.43712826 | 0.93818451  |
| C                                   | -0.38994703 | 4.11768564  | -0.95309507 | H    | 5.63449498  | -1.04995843 | 1.54909386  |
| C                                   | -1.75401653 | 3.74351664  | -0.95933833 | H    | 7.11436048  | 0.65155091  | 2.52210848  |
| C                                   | -1.82274501 | 2.40253091  | -0.38479389 | H    | 6.45696338  | 3.04480389  | 2.53460011  |
| N                                   | -0.53600869 | 1.96220694  | -0.15439125 | H    | 4.31322437  | 3.76086510  | 1.57282206  |
| C                                   | -2.97666526 | 1.69855433  | -0.00697346 | H    | 1.04982278  | 5.63455324  | -1.54901939 |
| C                                   | -2.99703214 | 0.34834264  | 0.37669614  | H    | -0.65181440 | 7.11443314  | -2.52185016 |
| C                                   | -4.11761594 | -0.38995733 | 0.95324357  | H    | -3.04504215 | 6.45695285  | -2.53423404 |
| C                                   | -3.74340891 | -1.75401650 | 0.95952385  | H    | -3.76097683 | 4.31312519  | -1.57252197 |
| C                                   | -2.40245111 | -1.82271817 | 0.38498643  | H    | -5.63461188 | 1.04976160  | 1.54896449  |
| N                                   | -1.96211179 | -0.53599139 | 0.15461348  | H    | -7.11446410 | -0.65190726 | 2.52179878  |
| C                                   | -1.69852514 | -2.97663645 | 0.00707750  | H    | -6.45678970 | -3.04510293 | 2.53445046  |
| C                                   | -0.34833076 | -2.99699873 | -0.37671011 | H    | -4.31287313 | -3.76096890 | 1.57291676  |
| C                                   | 0.38991087  | -4.11753306 | -0.95341895 | H    | -1.04989533 | -5.63431459 | -1.54951863 |
| C                                   | 1.75396988  | -3.74330633 | -0.95983618 | H    | 0.65164348  | -7.11391037 | -2.52291498 |
| C                                   | 1.82274683  | -2.40242204 | -0.38510659 | H    | 3.04483094  | -6.45622523 | -2.53575092 |
| N                                   | 0.53605751  | -1.96211349 | -0.15452705 | H    | 3.76081105  | -4.31251078 | -1.57380222 |
| C                                   | 4.27784024  | -2.44003689 | -0.01409627 | H    | -5.06687241 | 1.37809963  | -1.71265926 |
| C                                   | -2.43986534 | -4.27784638 | 0.01427742  | H    | -7.21995876 | 2.61029287  | -1.73412953 |
| C                                   | -4.27791213 | 2.43982034  | -0.01420603 | H    | -7.66523622 | 4.36698606  | -0.03060746 |
| C                                   | 5.34079780  | -0.01041811 | 1.51836753  | H    | -5.94009114 | 4.88898163  | 1.68334840  |
| C                                   | 6.17189559  | 0.95393060  | 2.07451497  | H    | -3.78086764 | 3.66734512  | 1.68278645  |
| C                                   | 5.80010571  | 2.30781327  | 2.08142452  | H    | -3.66781578 | -3.78048618 | -1.68231665 |
| C                                   | 4.59180722  | 2.71753077  | 1.53175273  | H    | -4.88964136 | -5.93960049 | -1.68281032 |
| C                                   | 0.01029396  | 5.34080806  | -1.51828409 | H    | -4.36735136 | -7.66499016 | 0.03080151  |
| C                                   | -0.95412632 | 6.17192147  | -2.07430917 | H    | -2.61009090 | -7.22011582 | 1.73384297  |
| C                                   | -2.30800278 | 5.80009137  | -2.08114424 | H    | -1.37768384 | -5.06715176 | 1.71227645  |
| C                                   | -2.71764251 | 4.59174896  | -1.53151680 | H    | 5.06808317  | -1.37746925 | -1.71142315 |

|    |             |             |             |   |            |             |             |
|----|-------------|-------------|-------------|---|------------|-------------|-------------|
| C  | -5.34078468 | 0.01025043  | 1.51835123  | H | 7.22089344 | -2.61010762 | -1.73233092 |
| C  | -6.17188855 | -0.95418607 | 2.07437195  | H | 7.66476187 | -4.36793981 | -0.02961481 |
| C  | -5.79995543 | -2.30804507 | 2.08134955  | H | 5.93845805 | -4.89060461 | 1.68297496  |
| C  | -4.59156567 | -2.71764510 | 1.53179227  | H | 3.77950590 | -3.66850321 | 1.68184438  |
| C  | -0.01036591 | -5.34055253 | -1.51882792 | C | 2.43986754 | 4.27800163  | 0.01408634  |
| C  | 0.95399411  | -6.17148363 | -2.07522294 | C | 3.43672523 | 4.53689109  | -0.93832303 |
| C  | 2.30784828  | -5.79954547 | -2.08230638 | C | 2.14937886 | 5.26023217  | 0.97262834  |
| C  | 2.71752007  | -4.59128611 | -1.53251406 | C | 4.12403898 | 5.75132684  | -0.93587769 |
| Pt | 0.00004291  | 0.00003684  | 0.00006483  | H | 3.66802750 | 3.78031422  | -1.68225967 |
| C  | -5.25983931 | 2.14955417  | -0.97312526 | C | 2.84244011 | 6.47145368  | 0.98160737  |
| C  | -6.47111612 | 2.84252484  | -0.98222608 | H | 1.37768226 | 5.06754128  | 1.71198077  |
| C  | -6.72108347 | 3.82985217  | -0.02606651 | C | 3.83012125 | 6.72105526  | 0.02571962  |
| C  | -5.75168949 | 4.12348214  | 0.93595952  | H | 4.88983745 | 5.93942792  | -1.68303606 |
| C  | -4.53719666 | 3.43626315  | 0.93852922  | H | 2.61001221 | 7.22053392  | 1.73321316  |
| C  | -3.43658102 | -4.53693368 | -0.93822699 | H | 4.36733945 | 7.66516018  | 0.03016932  |
| C  | -4.12391154 | -5.75136505 | -0.93561504 |   |            |             |             |

**Table S10.** Coordinates of the optimized structure for **Pt-TPTNP** at the B3LYP/6-31G(d,p) (for C, N, H) + SDD (for Pt) level of theory.

| E(B3LYP) = -3261.195841             |             |             |             |      |             |             |             |
|-------------------------------------|-------------|-------------|-------------|------|-------------|-------------|-------------|
| Charge = 0, Multiplicity = 1        |             |             |             |      |             |             |             |
| Number of Imaginary Frequencies = 0 |             |             |             |      |             |             |             |
| Atom                                | x           | y           | z           | Atom | x           | y           | z           |
| C                                   | -1.18994391 | -2.77289421 | 0.37967396  | C    | -5.15218071 | -1.29865804 | -1.54922162 |
| C                                   | -0.80785528 | -4.05724943 | 0.96434917  | C    | 7.28686137  | -1.57552088 | -2.68016421 |
| C                                   | 0.62255981  | -4.08576841 | 0.97750517  | C    | 8.34715858  | -0.90789895 | -3.24507159 |
| C                                   | 1.06619714  | -2.81965796 | 0.39662846  | C    | 8.37433638  | 0.51230582  | -3.25969422 |
| N                                   | -0.04462099 | -2.03470727 | 0.16523373  | C    | 7.34063678  | 1.23146671  | -2.70892746 |
| C                                   | -2.47479320 | -2.37074261 | -0.01442874 | C    | -1.57625755 | -7.28689465 | 2.67965613  |
| C                                   | 2.37072074  | -2.47479246 | 0.01393513  | C    | -0.90881312 | -8.34718260 | 3.24479009  |
| C                                   | 2.77278699  | -1.18989431 | -0.38009362 | C    | 0.51138679  | -8.37441661 | 3.25974083  |
| C                                   | 4.05709569  | -0.80768806 | -0.96483691 | C    | 1.23071579  | -7.34078368 | 2.70906605  |
| C                                   | 4.08555390  | 0.62271369  | -0.97779525 | C    | -7.28694207 | 1.57642320  | -2.67951299 |
| C                                   | 2.81945221  | 1.06621709  | -0.39697046 | C    | -8.34723060 | 0.90900513  | -3.24467737 |
| N                                   | 2.03462593  | -0.04460890 | -0.16532914 | C    | -8.37445106 | -0.51119415 | -3.25972276 |
| C                                   | 2.47475614  | 2.37075476  | -0.01438951 | C    | -7.34080316 | -1.23054859 | -2.70911016 |
| C                                   | 1.18997804  | 2.77292457  | 0.38008675  | C    | 1.57576549  | 7.28642554  | 2.68145857  |
| C                                   | 0.80782724  | 4.05713777  | 0.96519710  | C    | 0.90819222  | 8.34652267  | 3.24680052  |
| C                                   | -0.62259707 | 4.08555540  | 0.97839023  | C    | -0.51201080 | 8.37364745  | 3.26163978  |
| C                                   | -1.06617517 | 2.81956370  | 0.39732477  | C    | -1.23121220 | 7.34009459  | 2.71065051  |
| N                                   | 0.04463615  | 2.03471721  | 0.16565568  | H    | -2.75867501 | -4.45889786 | -1.72781896 |
| C                                   | -2.37075007 | 2.47479900  | 0.01480081  | H    | -4.55065746 | -6.17398807 | -1.75943601 |
| C                                   | -2.77292342 | 1.18999996  | -0.37948831 | H    | -6.36586139 | -6.10842951 | -0.05985202 |
| C                                   | -4.05727238 | 0.80796115  | -0.96426095 | H    | -6.37972562 | -4.31261946 | 1.66138502  |

|   |             |             |             |    |             |             |             |
|---|-------------|-------------|-------------|----|-------------|-------------|-------------|
| C | -4.08576985 | -0.62245161 | -0.97758323 | H  | -4.59412406 | -2.59050582 | 1.67240781  |
| C | -2.81964566 | -1.06614189 | -0.39682310 | H  | 4.45936160  | -2.75901314 | 1.72668686  |
| N | -2.03475043 | 0.04464441  | -0.16512921 | H  | 6.17453947  | -4.55092830 | 1.75737728  |
| C | 3.55545299  | 3.40807814  | -0.02680044 | H  | 6.10859816  | -6.36570067 | 0.05734596  |
| C | 3.40836310  | -3.55519218 | 0.02520560  | H  | 4.31235875  | -6.37916432 | -1.66344753 |
| C | -3.40827958 | 3.55529969  | 0.02677738  | H  | 2.59016433  | -4.59363963 | -1.67354109 |
| C | -3.55520680 | -3.40836628 | -0.02621392 | H  | -2.59053261 | 4.59425691  | -1.67187362 |
| C | -3.55446643 | -4.42805278 | -0.98947382 | H  | -4.31249034 | 6.38000486  | -1.66053202 |
| C | -4.56259221 | -5.39287858 | -1.00458175 | H  | -6.10809163 | 6.36619249  | 0.06092256  |
| C | -5.58249337 | -5.35593587 | -0.05049460 | H  | -6.17360796 | 4.55088132  | 1.76039635  |
| C | -5.59041515 | -4.34685813 | 0.91579954  | H  | -4.45868630 | 2.75874898  | 1.72845283  |
| C | -4.58591406 | -3.37819281 | 0.92485231  | H  | 4.59512891  | 2.58984489  | 1.67117402  |
| C | 4.42834834  | -3.55461898 | 0.98814910  | H  | 6.38133987  | 4.31132615  | 1.65904033  |
| C | 5.39322281  | -4.56270665 | 1.00273509  | H  | 6.36711898  | 6.10706334  | -0.06226582 |
| C | 5.35606356  | -5.58236721 | 0.04839857  | H  | 4.55104682  | 6.17309428  | -1.76090779 |
| C | 4.34674613  | -5.59006277 | -0.91764775 | H  | 2.75847811  | 4.45863939  | -1.72818207 |
| C | 3.37803315  | -4.58560472 | -0.92617594 | H  | 5.08450449  | -2.61677909 | -1.54935839 |
| C | -3.37812885 | 4.58606818  | -0.92422300 | H  | 5.18100801  | 2.37913667  | -1.59801538 |
| C | -4.34670844 | 5.59065042  | -0.91499217 | H  | -2.61712509 | -5.08450211 | 1.54860119  |
| C | -5.35567017 | 5.58275663  | 0.05142311  | H  | 2.37871047  | -5.18132885 | 1.59838996  |
| C | -5.39258864 | 4.56279581  | 1.00544862  | H  | 2.61690084  | 5.08447008  | 1.54997777  |
| C | -4.42785699 | 3.55458447  | 0.99015565  | H  | -2.37892464 | 5.18075836  | 1.59937747  |
| C | 4.58676664  | 3.37750372  | 0.92358887  | H  | -5.08458326 | 2.61724386  | -1.54838158 |
| C | 5.59160765  | 4.34581484  | 0.91391300  | H  | -5.18130007 | -2.37859169 | -1.59852899 |
| C | 5.58348118  | 5.35485703  | -0.05241425 | H  | 7.26219456  | -2.66222283 | -2.66690036 |
| C | 4.56309724  | 5.39206036  | -1.00597716 | H  | 9.17044778  | -1.46438950 | -3.68381052 |
| C | 3.55464185  | 4.42759132  | -0.99024706 | H  | 9.21815311  | 1.02774755  | -3.70943871 |
| C | 5.09690347  | -1.53578409 | -1.52162504 | H  | 7.35771423  | 2.31835632  | -2.71773081 |
| C | 6.19889644  | -0.86359318 | -2.09754505 | H  | -2.66295539 | -7.26217318 | 2.66615026  |
| C | 6.22654431  | 0.57378213  | -2.11211860 | H  | -1.46543977 | -9.17041460 | 3.68346386  |
| C | 5.15194809  | 1.29916310  | -1.54912881 | H  | 1.02669093  | -9.21822085 | 3.70966664  |
| C | -1.53612745 | -5.09699658 | 1.52102471  | H  | 2.31760257  | -7.35790061 | 2.71811848  |
| C | -0.86414269 | -6.19900825 | 2.09712038  | H  | -7.26223457 | 2.66312038  | -2.66593061 |
| C | 0.57321558  | -6.22670703 | 2.11202597  | H  | -9.17047509 | 1.46565283  | -3.68330104 |
| C | 1.29877975  | -5.15218025 | 1.54913713  | H  | -9.21825625 | -1.02647699 | -3.70967115 |
| C | 1.53592637  | 5.09682626  | 1.52225648  | H  | -7.35790844 | -2.31743501 | -2.71823577 |
| C | 0.86378747  | 6.19862767  | 2.09859059  | H  | 2.66246607  | 7.26179122  | 2.66803230  |
| C | -0.57356894 | 6.22622241  | 2.11338599  | H  | 1.46471994  | 9.16968624  | 3.68572844  |
| C | -1.29897551 | 5.15176110  | 1.55019739  | H  | -1.02741762 | 9.21729918  | 3.71173409  |
| C | -5.09703913 | 1.53624850  | -1.52089433 | H  | -2.31810127 | 7.35712108  | 2.71962203  |
| C | -6.19903895 | 0.86428256  | -2.09703986 | Pt | -0.00003525 | 0.00001246  | 0.00004176  |
| C | -6.22672666 | -0.57307461 | -2.11204102 |    |             |             |             |

**Table S11.** Coordinates of the optimized structure for **Pt-TPTAP** at the B3LYP/6-31G(d,p) (for C, N, H) + SDD (for Pt) level of theory.

| E(B3LYP) = -3875.743846             |             |             |             |      |             |             |             |
|-------------------------------------|-------------|-------------|-------------|------|-------------|-------------|-------------|
| Charge = 0, Multiplicity = 1        |             |             |             |      |             |             |             |
| Number of Imaginary Frequencies = 0 |             |             |             |      |             |             |             |
| Atom                                | x           | y           | z           | Atom | x           | y           | z           |
| C                                   | 0.99898455  | 2.84453685  | -0.39571717 | C    | 3.63934255  | -3.31852674 | 0.00666024  |
| C                                   | 0.52944498  | 4.09777875  | -0.98459840 | C    | 3.66700004  | -4.34473908 | 0.96265805  |
| C                                   | -0.90798882 | 4.03184786  | -0.98133209 | C    | 4.69931647  | -5.28376828 | 0.96873560  |
| C                                   | -1.25816059 | 2.74057477  | -0.39151419 | C    | 5.71599172  | -5.21396813 | 0.01297107  |
| N                                   | -0.09425333 | 2.03329946  | -0.17072438 | C    | 5.69607931  | -4.19804943 | -0.94595845 |
| C                                   | 2.30879169  | 2.53264749  | -0.00355368 | C    | 4.66695588  | -3.25549992 | -0.94617189 |
| C                                   | -2.53264797 | 2.30879444  | 0.00356056  | C    | -4.34470257 | -3.66703067 | -0.96269681 |
| C                                   | -2.84453909 | 0.99898861  | 0.39572754  | C    | -5.28372656 | -4.69935176 | -0.96878606 |
| C                                   | -4.09778514 | 0.52944944  | 0.98460020  | C    | -5.21395934 | -5.71600315 | -0.01299369 |
| C                                   | -4.03185319 | -0.90798437 | 0.98133716  | C    | -4.19807729 | -5.69606343 | 0.94597409  |
| C                                   | -2.74057705 | -1.25815645 | 0.39152577  | C    | -3.25553178 | -4.66693640 | 0.94619850  |
| N                                   | -2.03329983 | -0.09424939 | 0.17074274  | C    | -4.66693444 | 3.25553263  | -0.94620594 |
| C                                   | -2.30879395 | -2.53264254 | -0.00354997 | C    | -5.69605899 | 4.19808099  | -0.94599268 |
| C                                   | -0.99898718 | -2.84453123 | -0.39571341 | C    | -5.71600114 | 5.21396883  | 0.01296897  |
| C                                   | -0.52944733 | -4.09777681 | -0.98458515 | C    | -4.69935422 | 5.28373966  | 0.96876588  |
| C                                   | 0.90798593  | -4.03184642 | -0.98131729 | C    | -3.66703556 | 4.34471279  | 0.96268799  |
| C                                   | 1.25815744  | -2.74056872 | -0.39151120 | C    | 3.25554797  | 4.66693178  | 0.94619984  |
| N                                   | 0.09425045  | -2.03329356 | -0.17072248 | C    | 4.19809703  | 5.69605565  | 0.94597142  |
| C                                   | 2.53264407  | -2.30878877 | 0.00356330  | C    | 5.21396727  | 5.71599913  | -0.01300886 |
| C                                   | 2.84453554  | -0.99898339 | 0.39572957  | C    | 5.28371979  | 4.69935417  | -0.96880915 |
| C                                   | 4.09778398  | -0.52944299 | 0.98459569  | C    | 4.34469270  | 3.66703594  | -0.96271573 |
| C                                   | 4.03185094  | 0.90799054  | 0.98133284  | H    | -2.26077020 | -5.22883902 | -1.59501312 |
| C                                   | 2.74057389  | 1.25816156  | 0.39152360  | H    | 2.73829318  | -5.00021972 | -1.58274983 |
| N                                   | 2.03329647  | 0.09425423  | 0.17074329  | H    | -5.22884794 | 2.26077316  | 1.59502603  |
| C                                   | -1.18168783 | -5.17232761 | -1.55301773 | H    | -5.00022107 | -2.73828940 | 1.58278694  |
| C                                   | -0.43320415 | -6.23561234 | -2.12906864 | H    | 5.22885256  | -2.26076517 | 1.59501382  |
| C                                   | 1.01290011  | -6.16949572 | -2.12541057 | H    | 5.00021894  | 2.73829698  | 1.58277826  |
| C                                   | 1.65836443  | -5.04237490 | -1.54610232 | H    | 7.39592136  | -2.14892052 | 2.71396972  |
| C                                   | -5.17233579 | 1.18169076  | 1.55303315  | H    | 7.16827745  | 2.83026518  | 2.70140359  |
| C                                   | -6.23561795 | 0.43320826  | 2.12909030  | H    | -2.14892527 | -7.39590596 | -2.71397430 |
| C                                   | -6.16949842 | -1.01289578 | 2.12544018  | H    | 2.83026113  | -7.16827878 | -2.70137567 |
| C                                   | -5.04237823 | -1.65836114 | 1.54613182  | H    | 2.26076811  | 5.22883523  | -1.59503733 |
| C                                   | 5.17233835  | -1.18168303 | 1.55302241  | H    | -2.73829517 | 5.00021305  | -1.58278245 |
| C                                   | 6.23562176  | -0.43319953 | 2.12907579  | H    | 2.14892433  | 7.39589241  | -2.71401667 |
| C                                   | 6.16950017  | 1.01290440  | 2.12542757  | H    | -2.83026208 | 7.16826174  | -2.70142785 |
| C                                   | 5.04237695  | 1.65836861  | 1.54612380  | H    | -7.39591263 | 2.14893047  | 2.71399088  |
| C                                   | 7.34767447  | -1.06226442 | 2.71249438  | H    | -7.16827581 | -2.83025560 | 2.70141877  |
| C                                   | 8.39252955  | -0.33173229 | 3.28635893  | H    | -9.57932950 | 2.04901083  | 3.88192927  |

|   |              |              |             |    |              |              |             |
|---|--------------|--------------|-------------|----|--------------|--------------|-------------|
| C | 8.32641668   | 1.11450596   | 3.28268394  | H  | -11.39858230 | 0.71374430   | 4.88114644  |
| C | 7.21940100   | 1.74374683   | 2.70538193  | H  | -11.28470706 | -1.77725380  | 4.87482129  |
| C | -1.06226900  | -7.34766251  | -2.71249205 | H  | -9.35144286  | -2.93588086  | 3.86927700  |
| C | -0.33173661  | -8.39251960  | -3.28635270 | H  | 9.57934267   | -2.04899910  | 3.88189945  |
| C | 1.11450184   | -8.32641160  | -3.28266816 | H  | 11.39859764  | -0.71373113  | 4.88111072  |
| C | 1.74374268   | -7.21939857  | -2.70536110 | H  | 11.28471902  | 1.77726684   | 4.87478854  |
| C | 1.18168574   | 5.17232456   | -1.55304107 | H  | 9.35144910   | 2.93589228   | 3.86925322  |
| C | 0.43320260   | 6.23560361   | -2.12910323 | H  | -2.04900352  | -9.57932653  | -3.88190536 |
| C | -1.01290162  | 6.16948598   | -2.12544810 | H  | -0.71373509  | -11.39858515 | -4.88110935 |
| C | -1.65836655  | 5.04237004   | -1.54613071 | H  | 1.77726321   | -11.28471484 | -4.87477083 |
| C | 1.06226807   | 7.34764843   | -2.71253631 | H  | 2.93588854   | -9.35144974  | -3.86922629 |
| C | 0.33173629   | 8.39249939   | -3.28640885 | H  | 2.04900380   | 9.57930166   | -3.88196902 |
| C | -1.11450212  | 8.32639038   | -3.28272720 | H  | 0.71373650   | 11.39854959  | -4.88119396 |
| C | -1.74374360  | 7.21938254   | -2.70541093 | H  | -1.77726171  | 11.28467753  | -4.87486040 |
| C | -7.34766738  | 1.06227424   | 2.71251414  | H  | -2.93588814  | 9.35142137   | -3.86929991 |
| C | -8.39252119  | 0.33174295   | 3.28638214  | H  | 2.87385432   | -4.40114876  | 1.70235004  |
| C | -8.32641033  | -1.11449538  | 3.28270540  | H  | 4.70884511   | -6.07035151  | 1.71792786  |
| C | -7.21939788  | -1.74373722  | 2.70539829  | H  | 6.51832524   | -5.94627727  | 0.01539126  |
| C | -9.53171810  | 0.96296153   | 3.88001552  | H  | 6.48273034   | -4.13818796  | -1.69274492 |
| C | -10.54024606 | 0.22067216   | 4.43393010  | H  | 4.65334198   | -2.46274503  | -1.68830035 |
| C | -10.47504211 | -1.20566517  | 4.43030776  | H  | -4.40108686  | -2.87390337  | -1.70241060 |
| C | -9.40312374  | -1.85002220  | 3.87287479  | H  | -6.07028038  | -4.70890233  | -1.71800897 |
| C | 9.53172974   | -0.96294988  | 3.87998705  | H  | -5.94626479  | -6.51834000  | -0.01542281 |
| C | 10.54025892  | -0.22065971  | 4.43389834  | H  | -4.13824097  | -6.48269637  | 1.69278169  |
| C | 10.47505301  | 1.20567754   | 4.43027771  | H  | -2.46280546  | -4.65330143  | 1.68835706  |
| C | 9.40313152   | 1.85003367   | 3.87284970  | H  | -4.65329750  | 2.46280168   | -1.68835976 |
| C | -0.96295415  | -9.53171725  | -3.87998583 | H  | -6.48268795  | 4.13824235   | -1.69280426 |
| C | -0.22066372  | -10.54024844 | -4.43389308 | H  | -6.51833593  | 5.94627659   | 0.01538927  |
| C | 1.20567372   | -10.47504729 | -4.43026309 | H  | -4.70890634  | 6.07029843   | 1.71798358  |
| C | 1.85002980   | -9.40312839  | -3.87282996 | H  | -2.87391172  | 4.40109970   | 1.70240546  |
| C | 0.96295445   | 9.53169164   | -3.88005163 | H  | 2.46283065   | 4.65329390   | 1.68836815  |
| C | 0.22066466   | 10.54021690  | -4.43397050 | H  | 4.13827252   | 6.48268324   | 1.69278563  |
| C | -1.20567273  | 10.47501475  | -4.43034334 | H  | 5.94627537   | 6.51833360   | -0.01544106 |
| C | -1.85002941  | 9.40310088   | -3.87290138 | H  | 6.07026461   | 4.70890748   | -1.71804143 |
| C | -3.31852804  | -3.63934452  | -0.00665891 | H  | 4.40106554   | 2.87391374   | -1.70243586 |
| C | -3.63934805  | 3.31853107   | 0.00665761  | Pt | -0.00000172  | 0.00000302   | 0.00001800  |
| C | 3.31852884   | 3.63934683   | -0.00666636 |    |              |              |             |

**Table S12.** Coordinates of the optimized structure for **Pt-P** at the B3LYP/6-31G(d,p) (for C, N, Si, H) + SDD (for Pt) level of theory.

| E(B3LYP) = -3047.259662             |   |   |   |      |   |   |   |
|-------------------------------------|---|---|---|------|---|---|---|
| Charge = 0, Multiplicity = 1        |   |   |   |      |   |   |   |
| Number of Imaginary Frequencies = 0 |   |   |   |      |   |   |   |
| Atom                                | x | y | z | Atom | x | y | z |

|   |             |             |             |    |             |             |             |
|---|-------------|-------------|-------------|----|-------------|-------------|-------------|
| C | -1.11883612 | -2.85979141 | 0.00026258  | H  | 7.48547720  | 6.17188850  | -1.58197903 |
| C | -0.70420544 | -4.23862020 | 0.00055401  | H  | 7.19247604  | 4.42630530  | -1.57663981 |
| C | 0.65539437  | -4.24637110 | 0.00050693  | H  | 5.52870896  | 8.09736051  | -0.00114822 |
| C | 1.08596573  | -2.87249708 | 0.00018726  | H  | 4.15681664  | 7.41543133  | -0.88676246 |
| N | -0.01169446 | -2.04441274 | -0.00001410 | H  | 4.15603524  | 7.41574556  | 0.88349564  |
| C | -2.45920676 | -2.43114297 | 0.00028677  | C  | -5.40552385 | 6.70246405  | 1.54978641  |
| C | 2.43112591  | -2.45921728 | 0.00012580  | C  | -5.40556137 | 6.70246236  | -1.55039128 |
| C | 2.85977384  | -1.11884650 | -0.00009425 | C  | -7.28919678 | 4.78846599  | -0.00027858 |
| C | 4.23860272  | -0.70421591 | -0.00007942 | H  | -5.50294136 | 6.10062653  | 2.45900090  |
| C | 4.24635347  | 0.65538388  | -0.00027526 | H  | -4.42652857 | 7.19186061  | 1.57653155  |
| C | 2.87247949  | 1.08595518  | -0.00040661 | H  | -6.17203440 | 7.48534072  | 1.58116855  |
| N | 2.04439516  | -0.01170484 | -0.00034761 | H  | -5.50277118 | 6.10058203  | -2.45959937 |
| C | 2.45919969  | 2.43111519  | -0.00054579 | H  | -6.17221601 | 7.48519393  | -1.58187347 |
| C | 1.11882896  | 2.85976297  | -0.00056489 | H  | -4.42665572 | 7.19204370  | -1.57704793 |
| C | 0.70419825  | 4.23859171  | -0.00060550 | H  | -8.09732601 | 5.52883919  | -0.00010360 |
| C | -0.65540140 | 4.24634234  | -0.00056016 | H  | -7.41567671 | 4.15665896  | -0.88548726 |
| C | -1.08597243 | 2.87246847  | -0.00049099 | H  | -7.41552579 | 4.15640630  | 0.88477103  |
| N | 0.01168747  | 2.04438445  | -0.00053836 | C  | -6.70198853 | -5.40555772 | 1.55177368  |
| C | -2.43113235 | 2.45918911  | -0.00038167 | C  | -6.70296031 | -5.40557370 | -1.54840388 |
| C | -2.85978056 | 1.11881856  | -0.00021732 | C  | -4.78846853 | -7.28921097 | 0.00110303  |
| C | -4.23860922 | 0.70418781  | 0.00000577  | H  | -6.09986467 | -5.50299322 | 2.46079674  |
| C | -4.24636001 | -0.65541184 | 0.00019761  | H  | -7.19137228 | -4.42656077 | 1.57868914  |
| C | -2.87248606 | -1.08598292 | 0.00009011  | H  | -7.48485769 | -6.17206636 | 1.58338975  |
| N | -2.04440203 | 0.01167709  | -0.00021728 | H  | -6.10136526 | -5.50275943 | -2.45780331 |
| H | -1.38388223 | -5.07755200 | 0.00078225  | H  | -7.48569189 | -6.17223781 | -1.57965247 |
| H | 1.32556746  | -5.09287528 | 0.00068851  | H  | -7.19256383 | -4.42667438 | -1.57488996 |
| H | 5.07753454  | -1.38389282 | 0.00007997  | H  | -5.52883786 | -8.09734369 | 0.00153302  |
| H | 5.09285765  | 1.32555689  | -0.00030777 | H  | -4.15695658 | -7.41569581 | -0.88431546 |
| H | 1.38387495  | 5.07752355  | -0.00064493 | H  | -4.15611266 | -7.41552923 | 0.88594268  |
| H | -1.32557448 | 5.09284639  | -0.00055359 | C  | 5.40614034  | -6.70152497 | 1.55177677  |
| H | -5.07754107 | 1.38386439  | 0.00003216  | C  | 5.40519158  | -6.70332057 | -1.54840032 |
| H | -5.09286405 | -1.32558499 | 0.00041314  | C  | 7.28922737  | -4.78833493 | 0.00002170  |
| C | 3.47375151  | 3.43493277  | -0.00058068 | H  | 5.50389853  | -6.09916261 | 2.46060729  |
| C | 4.34119527  | 4.29619009  | -0.00061083 | H  | 4.42714983  | -7.19089497 | 1.57916313  |
| C | 3.43494384  | -3.47376905 | 0.00040741  | H  | 6.17265581  | -7.48439022 | 1.58333090  |
| C | 4.29620525  | -4.34120884 | 0.00065189  | H  | 5.50199884  | -6.10195503 | -2.45799177 |
| C | -3.43494918 | 3.47374138  | -0.00034414 | H  | 6.17191919  | -7.48598711 | -1.57971250 |
| C | -4.29619673 | 4.34119471  | -0.00031821 | H  | 4.42633004  | -7.19302559 | -1.57441415 |
| C | -3.47375915 | -3.43495995 | 0.00063840  | H  | 8.09739263  | -5.52866874 | 0.00046365  |
| C | -4.34121124 | -4.29620884 | 0.00093612  | H  | 7.41543837  | -4.15710046 | -0.88563364 |
| C | 6.70204711  | 5.40605678  | 1.54974831  | H  | 7.41576386  | -4.15569072 | 0.88462409  |
| C | 6.70280362  | 5.40517771  | -1.55042910 | Si | -5.64080209 | -5.60336491 | 0.00135284  |
| C | 4.78836361  | 7.28920573  | -0.00133198 | Si | -5.60334671 | 5.64079172  | -0.00029928 |
| H | 6.09999152  | 5.50378794  | 2.45878485  | Si | 5.64074705  | 5.60338497  | -0.00065535 |

|   |            |            |             |    |             |             |             |
|---|------------|------------|-------------|----|-------------|-------------|-------------|
| H | 7.19142166 | 4.42706295 | 1.57693814  | Si | 5.60341868  | -5.64074197 | 0.00101248  |
| H | 7.48492760 | 6.17256638 | 1.58106394  | Pt | -0.00000342 | -0.00001418 | -0.00064540 |
| H | 6.10113438 | 5.50203006 | -2.45981496 |    |             |             |             |

**Table S13.** Coordinates of the optimized structure for **Pt-TBP** at the B3LYP/6-31G(d,p) (for C, N, Si, H) + SDD (for Pt) level of theory.

| E(B3LYP) = -3661.819280             |             |             |             |      |             |             |             |
|-------------------------------------|-------------|-------------|-------------|------|-------------|-------------|-------------|
| Charge = 0, Multiplicity = 1        |             |             |             |      |             |             |             |
| Number of Imaginary Frequencies = 0 |             |             |             |      |             |             |             |
| Atom                                | x           | y           | z           | Atom | x           | y           | z           |
| C                                   | -0.64806356 | 2.94588461  | 0.38953989  | C    | -8.19968593 | 0.17928110  | -2.84935691 |
| C                                   | -1.73854161 | 3.90291911  | 0.26680860  | C    | -6.33018246 | 1.37922601  | -5.01453534 |
| C                                   | -2.84382035 | 3.18948742  | -0.25838650 | C    | -3.21047710 | -7.55628350 | 2.83014107  |
| C                                   | -2.41903259 | 1.80267634  | -0.38624545 | C    | -0.17745907 | -8.19792012 | 2.85314129  |
| N                                   | -1.10455562 | 1.71035595  | 0.00054534  | C    | -1.38275308 | -6.32784169 | 5.01487185  |
| C                                   | 0.69689719  | 3.23662887  | 0.72063067  | Pt   | -0.00006660 | -0.00001909 | -0.00017496 |
| C                                   | -3.23676271 | 0.69690016  | -0.72078164 | H    | -0.99703312 | 5.83958186  | 0.89268353  |
| C                                   | -2.94597714 | -0.64806159 | -0.38972222 | H    | -3.13194022 | 6.98947979  | 0.44128533  |
| C                                   | -3.90298049 | -1.73856961 | -0.26693012 | H    | -5.08750526 | 5.72699839  | -0.41893406 |
| C                                   | -3.18949070 | -2.84382955 | 0.25821468  | H    | -4.91566766 | 3.30975597  | -0.87895847 |
| C                                   | -1.80272619 | -2.41897378 | 0.38607860  | H    | -5.83970193 | -0.99714649 | -0.89271652 |
| N                                   | -1.71043137 | -1.10452030 | -0.00075697 | H    | -6.98944756 | -3.13218036 | -0.44142460 |
| C                                   | -0.69695241 | -3.23668197 | 0.72058771  | H    | -5.72680350 | -5.08772879 | 0.41859107  |
| C                                   | 0.64797260  | -2.94593302 | 0.38935167  | H    | -3.30955674 | -4.91574266 | 0.87862096  |
| C                                   | 1.73841987  | -3.90297888 | 0.26643858  | H    | 0.99691305  | -5.83964822 | 0.89230530  |
| C                                   | 2.84364458  | -3.18955373 | -0.25887340 | H    | 3.13172242  | -6.98960652 | 0.44050876  |
| C                                   | 2.41886717  | -1.80271993 | -0.38657848 | H    | 5.08719441  | -5.72714212 | -0.41994414 |
| N                                   | 1.10442846  | -1.71039678 | 0.00034141  | H    | 4.91537812  | -3.30988094 | -0.87982352 |
| C                                   | 3.23658044  | -0.69691554 | -0.72105881 | H    | 5.83953450  | 0.99687053  | -0.89284327 |
| C                                   | 2.94581975  | 0.64799833  | -0.38985204 | H    | 6.98947783  | 3.13175633  | -0.44132079 |
| C                                   | 3.90288164  | 1.73842741  | -0.26697861 | H    | 5.72700316  | 5.08731418  | 0.41893796  |
| C                                   | 3.18946517  | 2.84368256  | 0.25826681  | H    | 3.30975723  | 4.91550546  | 0.87893506  |
| C                                   | 1.80265044  | 2.41890759  | 0.38606439  | H    | 7.17485079  | -1.55781254 | -5.69081987 |
| N                                   | 1.71030389  | 1.10446826  | -0.00083498 | H    | 5.55554666  | -2.11395644 | -5.23638540 |
| C                                   | -4.44360302 | 0.95757900  | -1.43356543 | H    | 5.92540896  | -0.38469264 | -5.24291489 |
| C                                   | 0.95762288  | 4.44345772  | 1.43342048  | H    | 9.07824817  | -0.32799661 | -3.48693834 |
| C                                   | 4.44348098  | -0.95747461 | -1.43377353 | H    | 8.53792804  | -0.23509106 | -1.80467062 |
| C                                   | -0.95763782 | -4.44351475 | 1.43337598  | H    | 7.82206584  | 0.82937825  | -3.02521955 |
| C                                   | -1.17053284 | -5.42757562 | 2.12832597  | H    | 7.88240157  | -3.29483743 | -1.79290540 |
| C                                   | -5.42770373 | 1.17063641  | -2.12840774 | H    | 6.79176864  | -3.98155970 | -3.00707073 |
| C                                   | 1.17057478  | 5.42749439  | 2.12839087  | H    | 8.41116209  | -3.44353772 | -3.47484575 |
| C                                   | 5.42774607  | -1.17045169 | -2.12841013 | H    | 1.56218651  | 7.17194449  | 5.69165793  |
| C                                   | -1.83899610 | 5.28197050  | 0.51042838  | H    | 0.38942659  | 5.92179325  | 5.24478268  |
| C                                   | -3.04486585 | 5.92300348  | 0.25414027  | H    | 2.11902009  | 5.55355822  | 5.23481333  |



|    |             |             |             |   |             |             |             |
|----|-------------|-------------|-------------|---|-------------|-------------|-------------|
| C  | -4.15016377 | 5.20945622  | -0.23584734 | H | 3.44249901  | 8.41219282  | 3.47400075  |
| C  | -4.06082163 | 3.84764786  | -0.49701529 | H | 3.29125219  | 7.88555160  | 1.79161386  |
| C  | -5.28203190 | -1.83910033 | -0.51052535 | H | 3.98146719  | 6.79405701  | 3.00301823  |
| C  | -5.92297464 | -3.04503493 | -0.25429395 | H | 0.23117988  | 8.53713708  | 1.80907921  |
| C  | -5.20933665 | -4.15032967 | 0.23558670  | H | -0.83069891 | 7.81835345  | 3.03016851  |
| C  | -3.84753520 | -4.06090354 | 0.49675032  | H | 0.32559094  | 9.07554423  | 3.49187033  |
| C  | 1.83884981  | -5.28205347 | 0.50995752  | H | -8.41311873 | 3.44210724  | -3.47311003 |
| C  | 3.04465611  | -5.92311540 | 0.25344709  | H | -6.79496524 | 3.98132547  | -3.00244245 |
| C  | 4.14990206  | -5.20957728 | -0.23667431 | H | -7.88603210 | 3.29071442  | -1.79088300 |
| C  | 4.06057505  | -3.84775076 | -0.49774865 | H | -7.81808346 | -0.83106922 | -3.02972383 |
| C  | 5.28194077  | 1.83884673  | -0.51056791 | H | -9.07553381 | 0.32470903  | -3.49196759 |
| C  | 5.92299554  | 3.04469128  | -0.25420677 | H | -8.53751364 | 0.23080359  | -1.80901618 |
| C  | 5.20945234  | 4.14998619  | 0.23580889  | H | -5.55444867 | 2.11957789  | -5.23467351 |
| C  | 3.84763789  | 4.06066044  | 0.49695447  | H | -5.92215875 | 0.38987357  | -5.24484431 |
| Si | -6.88412446 | 1.48643823  | -3.21271830 | H | -7.17273011 | 1.56231815  | -5.69137291 |
| Si | -1.48654147 | -6.88341187 | 3.21335763  | H | -3.44100222 | -8.41425445 | 3.47198376  |
| Si | 6.88450330  | -1.48637251 | -3.21222123 | H | -3.98120965 | -6.79708507 | 2.99910028  |
| Si | 1.48655629  | 6.88369382  | 3.21294594  | H | -3.28751295 | -7.88842197 | 1.78954733  |
| C  | 6.33203701  | -1.37499997 | -5.01423882 | H | -0.32326916 | -9.07355252 | 3.49595874  |
| C  | 8.20170712  | -0.18181667 | -2.84544195 | H | 0.83218884  | -7.81525649 | 3.03517546  |
| C  | 7.55248136  | -3.21326966 | -2.83386045 | H | -0.22672314 | -8.53637776 | 1.81289472  |
| C  | 1.37893790  | 6.32954898  | 5.01467457  | H | -2.12405302 | -5.55247701 | 5.23311005  |
| C  | 3.21199377  | 7.55413255  | 2.83226936  | H | -1.56633975 | -7.16994410 | 5.69212979  |
| C  | 0.17973972  | 8.19957946  | 2.84951223  | H | -0.39409092 | -5.91887621 | 5.24647175  |
| C  | -7.55484932 | 3.21167804  | -2.83163313 |   |             |             |             |

**Table S14.** Coordinates of the optimized structure for **Pt-TNP** at the B3LYP/6-31G(d,p) (for C, N, Si, H) + SDD (for Pt) level of theory.

| E(B3LYP) = -4276.386855             |             |             |             |      |             |             |             |
|-------------------------------------|-------------|-------------|-------------|------|-------------|-------------|-------------|
| Charge = 0, Multiplicity = 1        |             |             |             |      |             |             |             |
| Number of Imaginary Frequencies = 0 |             |             |             |      |             |             |             |
| Atom                                | x           | y           | z           | Atom | x           | y           | z           |
| Pt                                  | 0.00000000  | 0.00000000  | 0.00000000  | C    | 2.89817075  | 4.75765578  | 0.53322145  |
| Si                                  | 0.00003161  | -6.94966327 | 3.35842422  | C    | 1.25275200  | 2.73829903  | 0.40724914  |
| N                                   | -1.44017546 | -1.44015312 | 0.00001917  | C    | 4.65665977  | 6.50316473  | 0.51553548  |
| C                                   | -2.73832895 | -1.25271292 | -0.40716747 | C    | -0.00001636 | 5.50727511  | 2.21212486  |
| C                                   | -2.51702527 | -3.45103508 | 0.27808849  | C    | 6.50331713  | 4.65648972  | -0.51513048 |
| C                                   | -5.16912744 | -4.22406981 | -0.26542441 | C    | 6.88640230  | 5.95186777  | -0.25971901 |
| C                                   | -0.00001565 | -3.29756290 | 0.75480873  | C    | 5.95206356  | 6.88621566  | 0.26020212  |
| C                                   | -3.45110124 | -2.51695346 | -0.27791327 | C    | 1.54757256  | 7.98480716  | 3.03220485  |
| C                                   | -4.75774688 | -2.89806264 | -0.53297223 | C    | -1.54762017 | 7.98480732  | 3.03213676  |
| C                                   | -4.22420461 | -5.16900129 | 0.26574985  | C    | -0.00005366 | 6.31116155  | 5.13504283  |
| C                                   | 0.00000000  | -4.51710799 | 1.49296638  | H    | -5.47439299 | -2.19908438 | -0.94032674 |
| C                                   | -2.89817075 | -4.75765578 | 0.53322145  | H    | -2.19920166 | -5.47430816 | 0.94057892  |

|    |             |             |             |   |             |             |             |
|----|-------------|-------------|-------------|---|-------------|-------------|-------------|
| C  | -1.25275200 | -2.73829903 | 0.40724914  | H | -3.93966229 | -7.21604607 | 0.91406594  |
| C  | -4.65665977 | -6.50316473 | 0.51553548  | H | -7.21618869 | -3.93948794 | -0.91366991 |
| C  | 0.00001636  | -5.50727511 | 2.21212486  | H | -7.90741001 | -6.26677062 | -0.45523747 |
| C  | -6.50331713 | -4.65648972 | -0.51513048 | H | -6.26699367 | -7.90720284 | 0.45578350  |
| C  | -6.88640230 | -5.95186777 | -0.25971901 | H | -1.58771726 | -8.84375036 | 3.71175299  |
| C  | -5.95206356 | -6.88621566 | 0.26020212  | H | -2.45928615 | -7.39760229 | 3.18347083  |
| C  | -1.54757256 | -7.98480716 | 3.03220485  | H | -1.55847148 | -8.37084916 | 2.00727905  |
| C  | 1.54762017  | -7.98480732 | 3.03213676  | H | 2.45934427  | -7.39761425 | 3.18338169  |
| C  | 0.00005366  | -6.31116155 | 5.13504283  | H | 1.55847831  | -8.37082318 | 2.00720021  |
| Si | -6.94966327 | -0.00003161 | -3.35842422 | H | 1.58777955  | -8.84377037 | 3.71165870  |
| N  | -1.44015312 | 1.44017546  | -0.00001917 | H | -0.88416996 | -5.69740590 | 5.33450064  |
| C  | -1.25271292 | 2.73832895  | 0.40716747  | H | 0.00016403  | -7.14414157 | 5.84753634  |
| C  | -3.45103508 | 2.51702527  | -0.27808849 | H | 0.88417072  | -5.69723016 | 5.33442815  |
| C  | -4.22406981 | 5.16912744  | 0.26542441  | H | -2.19908438 | 5.47439299  | 0.94032674  |
| C  | -3.29756290 | 0.00001565  | -0.75480873 | H | -5.47430816 | 2.19920166  | -0.94057892 |
| C  | -2.51695346 | 3.45110124  | 0.27791327  | H | -7.21604607 | 3.93966229  | -0.91406594 |
| C  | -2.89806264 | 4.75774688  | 0.53297223  | H | -3.93948794 | 7.21618869  | 0.91366991  |
| C  | -5.16900129 | 4.22420461  | -0.26574985 | H | -6.26677062 | 7.90741001  | 0.45523747  |
| C  | -4.51710799 | 0.00000000  | -1.49296638 | H | -7.90720284 | 6.26699367  | -0.45578350 |
| C  | -4.75765578 | 2.89817075  | -0.53322145 | H | -8.37084916 | 1.55847148  | -2.00727905 |
| C  | -2.73829903 | 1.25275200  | -0.40724914 | H | -7.39760229 | 2.45928615  | -3.18347083 |
| C  | -6.50316473 | 4.65665977  | -0.51553548 | H | -8.84375036 | 1.58771726  | -3.71175299 |
| C  | -5.50727511 | -0.00001636 | -2.21212486 | H | -8.37082318 | -1.55847831 | -2.00720021 |
| C  | -4.65648972 | 6.50331713  | 0.51513048  | H | -8.84377037 | -1.58777955 | -3.71165870 |
| C  | -5.95186777 | 6.88640230  | 0.25971901  | H | -7.39761425 | -2.45934427 | -3.18338169 |
| C  | -6.88621566 | 5.95206356  | -0.26020212 | H | -7.14414157 | -0.00016403 | -5.84753634 |
| C  | -7.98480716 | 1.54757256  | -3.03220485 | H | -5.69723016 | -0.88417072 | -5.33442815 |
| C  | -7.98480732 | -1.54762017 | -3.03213676 | H | -5.69740590 | 0.88416996  | -5.33450064 |
| C  | -6.31116155 | -0.00005366 | -5.13504283 | H | 2.19908438  | -5.47439299 | 0.94032674  |
| Si | 6.94966327  | 0.00003161  | -3.35842422 | H | 5.47430816  | -2.19920166 | -0.94057892 |
| N  | 1.44015312  | -1.44017546 | -0.00001917 | H | 7.21604607  | -3.93966229 | -0.91406594 |
| C  | 1.25271292  | -2.73832895 | 0.40716747  | H | 3.93948794  | -7.21618869 | 0.91366991  |
| C  | 3.45103508  | -2.51702527 | -0.27808849 | H | 6.26677062  | -7.90741001 | 0.45523747  |
| C  | 4.22406981  | -5.16912744 | 0.26542441  | H | 7.90720284  | -6.26699367 | -0.45578350 |
| C  | 3.29756290  | -0.00001565 | -0.75480873 | H | 7.39760229  | -2.45928615 | -3.18347083 |
| C  | 2.51695346  | -3.45110124 | 0.27791327  | H | 8.37084916  | -1.55847148 | -2.00727905 |
| C  | 2.89806264  | -4.75774688 | 0.53297223  | H | 8.84375036  | -1.58771726 | -3.71175299 |
| C  | 5.16900129  | -4.22420461 | -0.26574985 | H | 8.84377037  | 1.58777955  | -3.71165870 |
| C  | 4.51710799  | 0.00000000  | -1.49296638 | H | 8.37082318  | 1.55847831  | -2.00720021 |
| C  | 4.75765578  | -2.89817075 | -0.53322145 | H | 7.39761425  | 2.45934427  | -3.18338169 |
| C  | 2.73829903  | -1.25275200 | -0.40724914 | H | 7.14414157  | 0.00016403  | -5.84753634 |
| C  | 6.50316473  | -4.65665977 | -0.51553548 | H | 5.69723016  | 0.88417072  | -5.33442815 |
| C  | 5.50727511  | 0.00001636  | -2.21212486 | H | 5.69740590  | -0.88416996 | -5.33450064 |
| C  | 4.65648972  | -6.50331713 | 0.51513048  | H | 5.47439299  | 2.19908438  | -0.94032674 |

|    |             |             |             |   |             |            |             |
|----|-------------|-------------|-------------|---|-------------|------------|-------------|
| C  | 5.95186777  | -6.88640230 | 0.25971901  | H | 2.19920166  | 5.47430816 | 0.94057892  |
| C  | 6.88621566  | -5.95206356 | -0.26020212 | H | 3.93966229  | 7.21604607 | 0.91406594  |
| C  | 7.98480716  | -1.54757256 | -3.03220485 | H | 7.21618869  | 3.93948794 | -0.91366991 |
| C  | 7.98480732  | 1.54762017  | -3.03213676 | H | 7.90741001  | 6.26677062 | -0.45523747 |
| C  | 6.31116155  | 0.00005366  | -5.13504283 | H | 6.26699367  | 7.90720284 | 0.45578350  |
| Si | -0.00003161 | 6.94966327  | 3.35842422  | H | 1.55847148  | 8.37084916 | 2.00727905  |
| N  | 1.44017546  | 1.44015312  | 0.00001917  | H | 2.45928615  | 7.39760229 | 3.18347083  |
| C  | 2.73832895  | 1.25271292  | -0.40716747 | H | 1.58771726  | 8.84375036 | 3.71175299  |
| C  | 2.51702527  | 3.45103508  | 0.27808849  | H | -1.58777955 | 8.84377037 | 3.71165870  |
| C  | 5.16912744  | 4.22406981  | -0.26542441 | H | -1.55847831 | 8.37082318 | 2.00720021  |
| C  | 0.00001565  | 3.29756290  | 0.75480873  | H | -2.45934427 | 7.39761425 | 3.18338169  |
| C  | 3.45110124  | 2.51695346  | -0.27791327 | H | -0.00016403 | 7.14414157 | 5.84753634  |
| C  | 4.75774688  | 2.89806264  | -0.53297223 | H | -0.88417072 | 5.69723016 | 5.33442815  |
| C  | 4.22420461  | 5.16900129  | 0.26574985  | H | 0.88416996  | 5.69740590 | 5.33450064  |
| C  | 0.00000000  | 4.51710799  | 1.49296638  |   |             |            |             |

**Table S15.** Coordinates of the optimized structure for **Pt-TAP** at the B3LYP/6-31G(d,p) (for C, N, Si, H) + SDD (for Pt) level of theory.

| E(B3LYP) = -4890.932185             |             |             |             |      |             |             |             |
|-------------------------------------|-------------|-------------|-------------|------|-------------|-------------|-------------|
| Charge = 0, Multiplicity = 1        |             |             |             |      |             |             |             |
| Number of Imaginary Frequencies = 0 |             |             |             |      |             |             |             |
| Atom                                | x           | y           | z           | Atom | x           | y           | z           |
| C                                   | -2.79656048 | -1.14838653 | 0.39431723  | C    | -6.84303628 | 5.25243874  | 1.46834992  |
| C                                   | -4.05711134 | -0.75828894 | 1.00955188  | C    | -6.28204966 | 5.85778963  | -1.51187542 |
| C                                   | -4.05907596 | 0.68059216  | 1.04758674  | C    | 7.28421405  | -4.71104786 | -0.23787670 |
| C                                   | -2.79928411 | 1.10375116  | 0.45199429  | C    | 5.26643232  | -6.90972484 | -1.06794844 |
| N                                   | -2.04235753 | -0.01666879 | 0.18502668  | C    | 5.70127615  | -6.27686832 | 1.92879312  |
| C                                   | -2.42408358 | -2.43515288 | -0.05488321 | C    | 4.31406074  | 4.25467151  | -0.15770319 |
| C                                   | -2.43448936 | 2.40688532  | 0.05352466  | Pt   | -0.00858234 | -0.00929312 | -0.00251874 |
| C                                   | -1.14806625 | 2.77920753  | -0.39751489 | C    | -5.27415307 | -6.84167905 | -1.46664917 |
| C                                   | -0.75838348 | 4.04007527  | -1.01200167 | C    | -7.29315022 | -4.62446955 | -0.68242194 |
| C                                   | 0.68051344  | 4.04195277  | -1.05111889 | C    | -5.86556314 | -6.28833475 | 1.51785997  |
| C                                   | 1.10396662  | 2.78184861  | -0.45678555 | H    | 5.06370710  | 2.54065418  | 1.57734096  |
| N                                   | -0.01627115 | 2.02466649  | -0.18977884 | H    | 5.05958759  | -2.46287824 | 1.72338578  |
| C                                   | 2.40727134  | 2.41716612  | -0.05796247 | H    | -2.55967643 | 5.06025326  | -1.58230386 |
| C                                   | 2.77949962  | 1.13118853  | 0.39326797  | H    | 2.44573756  | 5.07568544  | -1.70722513 |
| C                                   | 4.03957173  | 0.74085590  | 1.00900019  | H    | 2.54021518  | -5.09575036 | -1.56135540 |
| C                                   | 4.03854722  | -0.69794989 | 1.05044742  | H    | -2.46583991 | -5.08931115 | -1.70521228 |
| C                                   | 2.78052689  | -1.12097628 | 0.45159406  | H    | 2.55890899  | -7.24830086 | -2.74525194 |
| N                                   | 2.02454765  | -0.00082386 | 0.18480118  | H    | -2.42208581 | -7.24040495 | -2.89039303 |
| C                                   | 2.41862542  | -2.42453261 | 0.04712668  | H    | 7.21967888  | 2.56220385  | 2.75714049  |
| C                                   | 1.13166046  | -2.79993620 | -0.39582350 | H    | 7.21323323  | -2.41900878 | 2.90624934  |
| C                                   | 0.74045308  | -4.06271507 | -1.00615459 | H    | -5.07644019 | -2.55922491 | 1.58216208  |
| C                                   | -0.69840453 | -4.06126124 | -1.04680437 | H    | -5.09230251 | 2.44619977  | 1.70323960  |

|   |             |              |             |   |              |              |             |
|---|-------------|--------------|-------------|---|--------------|--------------|-------------|
| C | -1.12051646 | -2.80048086  | -0.45278055 | H | -7.22880999  | -2.58418850  | 2.76524053  |
| N | -0.00008916 | -2.04408385  | -0.18700487 | H | -7.24687144  | 2.39766360   | 2.88514049  |
| C | 5.07067326  | 1.45992867   | 1.57333521  | H | -2.58526605  | 7.21402213   | -2.76277158 |
| C | 6.15469193  | 0.77840074   | 2.19331732  | H | 2.39649232   | 7.23152816   | -2.88675571 |
| C | 6.15312684  | -0.66947147  | 2.23610749  | H | -2.62611757  | 9.37491801   | -3.97397016 |
| C | 5.06831255  | -1.38439614  | 1.65617988  | H | -1.40985859  | 11.23138684  | -5.05339476 |
| C | -1.47899950 | 5.07005728   | -1.57594255 | H | 1.08253475   | 11.23913066  | -5.11555819 |
| C | -0.79892924 | 6.15696417   | -2.19208623 | H | 2.36247251   | 9.38999215   | -4.09839003 |
| C | 0.64915635  | 6.16139904   | -2.22796277 | H | 2.59443570   | -9.40543127  | -3.96098060 |
| C | 1.36659974  | 5.07767192   | -1.64759079 | H | 1.37416011   | -11.25473081 | -5.04879254 |
| C | 1.45937710  | -5.09810961  | -1.56268784 | H | -1.11794316  | -11.25083389 | -5.12130663 |
| C | 0.77609220  | -6.18242209  | -2.18147742 | H | -2.39360871  | -9.39761701  | -4.10610205 |
| C | -0.67179090 | -6.18038841  | -2.22330898 | H | 9.37897378   | 2.59905934   | 3.96964648  |
| C | -1.38682928 | -5.09464576  | -1.64399536 | H | 11.22913911  | 1.38015525   | 5.05684577  |
| C | 1.47189480  | -7.25007609  | -2.77113158 | H | 11.22600341  | -1.11191051  | 5.13126457  |
| C | 0.80725268  | -8.31254938  | -3.39249768 | H | 9.37270605   | -2.38886045  | 4.11858141  |
| C | -0.63908652 | -8.31030832  | -3.43458680 | H | -9.38841647  | -2.62433042  | 3.97880256  |
| C | -1.33540308 | -7.24576620  | -2.85267411 | H | -11.24386600 | -1.40743374  | 5.05929114  |
| C | 7.22261158  | 1.47460852   | 2.78207054  | H | -11.25187907 | 1.08498939   | 5.11941614  |
| C | 8.28599686  | 0.81126682   | 3.40300196  | H | -9.40402889  | 2.36434268   | 4.09914181  |
| C | 8.28418098  | -0.63534104  | 3.44622796  | H | 7.52182586   | 3.80271442   | -0.00554503 |
| C | 7.21910683  | -1.33190709  | 2.86580489  | H | 8.11565137   | 5.31104470   | -0.71880357 |
| C | -5.08635568 | -1.47857216  | 1.57507504  | H | 7.18336869   | 4.16923581   | -1.70027064 |
| C | -6.17273751 | -0.79815085  | 2.19192360  | H | 4.93253277   | 6.76519272   | 1.81711867  |
| C | -6.17731696 | 0.64990939   | 2.22663354  | H | 6.66190092   | 7.00739381   | 1.52170386  |
| C | -5.09421196 | 1.36702786   | 1.64450964  | H | 6.09066255   | 5.51000508   | 2.27247957  |
| C | -7.23720327 | -1.49649496  | 2.78425885  | H | 6.04453940   | 7.58210269   | -1.51480544 |
| C | -8.30353215 | -0.83482760  | 3.40189668  | H | 4.32025371   | 7.34402770   | -1.19801109 |
| C | -8.30795639 | 0.61183679   | 3.43690835  | H | 5.12845778   | 6.40715483   | -2.46883012 |
| C | -7.24640349 | 1.31080752   | 2.85256650  | H | -5.32280990  | 8.11713788   | 0.71648110  |
| C | -1.49758335 | 7.22224882   | -2.78271895 | H | -3.81648636  | 7.52110437   | 0.00079276  |
| C | -0.83629801 | 8.28912107   | -3.39970416 | H | -4.18015052  | 7.18433761   | 1.69648872  |
| C | 0.61037423  | 8.29338862   | -3.43590223 | H | -7.35918635  | 4.32430846   | 1.20176355  |
| C | 1.30965966  | 7.23114456   | -2.85332213 | H | -7.59418132  | 6.04892872   | 1.51890500  |
| C | -1.53943718 | 9.38028836   | -4.00154499 | H | -6.41854839  | 5.13129534   | 2.47060022  |
| C | -0.86295793 | 10.40965707  | -4.60019527 | H | -7.02519967  | 6.66348612   | -1.51956644 |
| C | 0.56403438  | 10.41406930  | -4.63582177 | H | -6.78512614  | 4.93372044   | -1.81439440 |
| C | 1.27579366  | 9.38888204   | -4.07187486 | H | -5.52976334  | 6.09045506   | -2.27285548 |
| C | 1.50790332  | -9.40592981  | -3.99325987 | H | 8.11145864   | -5.42787434  | -0.18110561 |
| C | 0.82919097  | -10.43121602 | -4.59648191 | H | 7.50676505   | -3.88682346  | 0.44761921  |
| C | -0.59762084 | -10.42898903 | -4.63799827 | H | 7.26516113   | -4.30018362  | -1.25247080 |
| C | -1.30704317 | -9.40152885  | -4.07514851 | H | 6.04398541   | -7.68173840  | -1.04345504 |
| C | 9.37964806  | 1.51252722   | 4.00253160  | H | 5.22550804   | -6.51119928  | -2.08724513 |
| C | 10.40551266 | 0.83460540   | 4.60550732  | H | 4.30857506   | -7.39425614  | -0.85237360 |

|   |              |             |             |    |             |             |             |
|---|--------------|-------------|-------------|----|-------------|-------------|-------------|
| C | 10.40371118  | -0.59219227 | 4.64813089  | H  | 6.48862823  | -7.03553371 | 2.00612541  |
| C | 9.37608257   | -1.30230665 | 4.08662019  | H  | 4.74980009  | -6.75240208 | 2.18776127  |
| C | -9.39389960  | -1.53763144 | 4.00550226  | H  | 5.90347297  | -5.50764193 | 2.68143026  |
| C | -10.42271288 | -0.86078840 | 4.60474392  | H  | -6.07053942 | -7.59306872 | -1.51523749 |
| C | -10.42728005 | 0.56619981  | 4.63920109  | H  | -4.34448394 | -7.35803983 | -1.20594415 |
| C | -9.40279946  | 1.27764491  | 4.07352533  | H  | -5.15806216 | -6.41459850 | -2.46839176 |
| C | 3.42725000   | 3.41382461  | -0.11187985 | H  | -8.13598897 | -5.32503943 | -0.69722158 |
| C | -3.43077490  | 3.42715098  | 0.10880325  | H  | -7.20855515 | -4.17975188 | -1.67922130 |
| C | -3.44409712  | -3.43184123 | -0.10769233 | H  | -7.53748045 | -3.81987135 | 0.01879788  |
| C | 3.43028652   | -3.43057046 | 0.08078707  | H  | -6.67074781 | -7.03201595 | 1.52757850  |
| C | -4.33105983  | -4.27260014 | -0.15242309 | H  | -6.09506112 | -5.53801840 | 2.28174231  |
| C | 7.27325050   | 4.60999165  | -0.70217819 | H  | -4.93975503 | -6.79155305 | 1.81477989  |
| C | 5.85686966   | 6.26353533  | 1.51307160  | Si | 5.67895100  | 5.49084680  | -0.20259309 |
| C | 5.24909393   | 6.82975351  | -1.46572006 | Si | 5.64438478  | -5.54724196 | 0.18642701  |
| C | 4.30459744   | -4.28499465 | 0.11480449  | Si | -5.69653826 | -5.50819238 | -0.19531275 |
| C | -4.62269949  | 7.27396680  | 0.69916551  | Si | -5.50613881 | 5.68025685  | 0.20236726  |
| C | -4.27133793  | 4.31416203  | 0.15601521  |    |             |             |             |

**Table S16.** Coordinates of the optimized structure for **Pt-TPFTNP** at the B3LYP/6-31G(d,p) (for C, N, F, H) + SDD (for Pt) level of theory.

| E(B3LYP) = -5245.672029             |             |             |             |      |             |             |             |
|-------------------------------------|-------------|-------------|-------------|------|-------------|-------------|-------------|
| Charge = 0, Multiplicity = 1        |             |             |             |      |             |             |             |
| Number of Imaginary Frequencies = 0 |             |             |             |      |             |             |             |
| Atom                                | x           | y           | z           | Atom | x           | y           | z           |
| C                                   | -2.74673450 | 1.23501664  | 0.39638736  | C    | -1.21114786 | 5.17063851  | -1.55292742 |
| C                                   | -4.03801440 | 0.87594840  | 0.97845730  | C    | -1.69377986 | -7.25022383 | -2.70502581 |
| C                                   | -4.09333368 | -0.55395959 | 0.98243908  | C    | -1.04225846 | -8.32261402 | -3.26618656 |
| C                                   | -2.83442921 | -1.01501182 | 0.40139822  | C    | 0.37648574  | -8.37693771 | -3.27110343 |
| N                                   | -2.03090533 | 0.07998077  | 0.17454379  | C    | 1.11193837  | -7.35769587 | -2.71463475 |
| C                                   | -2.31860038 | 2.50796594  | -0.00408967 | C    | -7.25048414 | 1.69375517  | 2.70439514  |
| C                                   | -2.50797102 | -2.31859775 | 0.00392584  | C    | -8.32291020 | 1.04222492  | 3.26547685  |
| C                                   | -1.23501811 | -2.74669220 | -0.39659278 | C    | -8.37721849 | -0.37652038 | 3.27039836  |
| C                                   | -0.87595387 | -4.03791011 | -0.97880543 | C    | -7.35792611 | -1.11196557 | 2.71401293  |
| C                                   | 0.55395473  | -4.09323621 | -0.98279615 | C    | 1.69405493  | 7.25045413  | -2.70415977 |
| C                                   | 1.01501721  | -2.83438327 | -0.40163732 | C    | 1.04258673  | 8.32287734  | -3.26531948 |
| N                                   | -0.07997832 | -2.03089383 | -0.17464919 | C    | -0.37615765 | 8.37718971  | -3.27039045 |
| C                                   | 2.31862913  | -2.50795912 | -0.00417881 | C    | -1.11166424 | 7.35790431  | -2.71407268 |
| C                                   | 2.74672292  | -1.23506578 | 0.39649254  | C    | 7.25024516  | -1.69408058 | 2.70488136  |
| C                                   | 4.03793940  | -0.87606754 | 0.97873945  | C    | 8.32264005  | -1.04262077 | 3.26610404  |
| C                                   | 4.09326640  | 0.55383996  | 0.98288664  | C    | 8.37697068  | 0.37612324  | 3.27116425  |
| C                                   | 2.83440962  | 1.01496241  | 0.40178969  | C    | 7.35773117  | 1.11163756  | 2.71477316  |
| N                                   | 2.03090867  | -0.08000667 | 0.17473002  | H    | -2.69773475 | -5.02860365 | -1.59194642 |
| C                                   | 2.50797912  | 2.31860196  | 0.00445413  | H    | 2.29049088  | -5.22042914 | -1.60747487 |
| C                                   | 1.23506803  | 2.74673097  | -0.39615164 | H    | -5.02876948 | 2.69772623  | 1.59150478  |

|   |             |             |             |    |             |             |             |
|---|-------------|-------------|-------------|----|-------------|-------------|-------------|
| C | 0.87606085  | 4.03800608  | -0.97827103 | H  | -5.22055437 | -2.29050375 | 1.60704544  |
| C | -0.55384642 | 4.09332668  | -0.98240832 | H  | 5.02861015  | -2.69791260 | 1.59172671  |
| C | -1.01496333 | 2.83442485  | -0.40140850 | H  | 5.22045373  | 2.29031054  | 1.60775804  |
| N | 0.08000783  | 2.03090641  | -0.17441244 | H  | 2.69790319  | 5.02874825  | -1.59114708 |
| C | 3.33091507  | -3.60305597 | -0.00656736 | H  | -2.29032301 | 5.22054382  | -1.60720688 |
| C | -3.60309951 | -3.33084840 | 0.00601578  | H  | -2.77981824 | -7.20570860 | -2.70236149 |
| C | 3.60306864  | 3.33089506  | 0.00688060  | H  | -1.61133521 | -9.13410034 | -3.70996155 |
| C | -3.33087528 | 3.60307302  | -0.00635857 | H  | 0.87876236  | -9.22944512 | -3.71858248 |
| C | -4.36505751 | 3.63628074  | -0.94742340 | H  | 2.19818460  | -7.39643265 | -2.71931620 |
| C | -5.31473852 | 4.65522406  | -0.96096502 | H  | -7.20597980 | 2.77979396  | 2.70172967  |
| C | -5.24182468 | 5.67341110  | -0.01140771 | H  | -9.13443685 | 1.61129492  | 3.70918657  |
| C | -4.22345113 | 5.66715972  | 0.94072436  | H  | -9.22975485 | -0.87880319 | 3.71781524  |
| C | -3.28380157 | 4.63895572  | 0.93227479  | H  | -7.39665146 | -2.19821214 | 2.71869849  |
| C | -3.63638358 | -4.36515038 | 0.94694638  | H  | 2.78009328  | 7.20594651  | -2.70137994 |
| C | -4.65534644 | -5.31481345 | 0.96030377  | H  | 1.61170568  | 9.13439832  | -3.70897680 |
| C | -5.67347270 | -5.24176007 | 0.01069199  | H  | -0.87839108 | 9.22972373  | -3.71786725 |
| C | -5.66714178 | -4.22326740 | -0.94131201 | H  | -2.19791021 | 7.39663331  | -2.71887155 |
| C | -4.63892116 | -3.28363824 | -0.93267790 | H  | 7.20572437  | -2.78011843 | 2.70210792  |
| C | 4.63906666  | 3.28387517  | -0.93162843 | H  | 9.13412511  | -1.61174581 | 3.70981930  |
| C | 5.66725677  | 4.22354168  | -0.93991378 | H  | 9.22948168  | 0.87835006  | 3.71869234  |
| C | 5.67337861  | 5.24187418  | 0.01226326  | H  | 7.39647308  | 2.19788306  | 2.71956517  |
| C | 4.65507775  | 5.31473016  | 0.96170276  | Pt | 0.00000748  | -0.00000440 | 0.00008778  |
| C | 3.63615074  | 4.36503458  | 0.94799669  | F  | 4.15671029  | -6.64491957 | 1.84934670  |
| C | 3.28377872  | -4.63908785 | 0.93189982  | F  | 6.14699362  | -6.65410900 | -0.01434891 |
| C | 4.22341603  | -5.66730429 | 0.94023721  | F  | 6.29236412  | -4.66418051 | -1.87281596 |
| C | 5.24182904  | -5.67342682 | -0.01185307 | F  | 4.46060528  | -2.67270345 | -1.87137292 |
| C | 5.31478239  | -4.65510965 | -0.96126869 | F  | 2.31811074  | -4.65981513 | 1.85801989  |
| C | 4.36511452  | -3.63615585 | -0.94761554 | F  | -4.66460457 | -6.29248530 | 1.87175252  |
| C | -1.61761218 | -5.06167251 | -1.54452749 | F  | -2.67311618 | -4.46073848 | 1.87088655  |
| C | -0.96480123 | -6.17856376 | -2.11539529 | F  | -6.65416027 | -6.14691970 | 0.01290116  |
| C | 0.47111455  | -6.23365481 | -2.12020114 | F  | -6.64456359 | -4.15648003 | -1.85062420 |
| C | 1.21131148  | -5.17051465 | -1.55332249 | F  | -4.65944197 | -2.31789261 | -1.85872284 |
| C | -5.06183289 | 1.61760271  | 1.54407993  | F  | -4.46050747 | 2.67295744  | -1.87131924 |
| C | -6.17876950 | 0.96478445  | 2.11485331  | F  | -6.29229405 | 4.66440758  | -1.87253889 |
| C | -6.23384479 | -0.47113332 | 2.11966420  | F  | -6.14700235 | 6.65408158  | -0.01379272 |
| C | -5.17064904 | -1.21132215 | 1.55287879  | F  | -4.15679577 | 6.64464027  | 1.84998277  |
| C | 5.06169152  | -1.61778467 | 1.54439384  | F  | -2.31817429 | 4.65955346  | 1.85844086  |
| C | 6.17858789  | -0.96503704 | 2.11532525  | F  | 4.65979169  | 2.31828681  | -1.85783237 |
| C | 6.23368624  | 0.47087910  | 2.12027627  | F  | 6.64484749  | 4.15694100  | -1.84905820 |
| C | 5.17054323  | 1.21113606  | 1.55347939  | F  | 6.65403481  | 6.14706702  | 0.01480422  |
| C | 1.61777505  | 5.06181491  | -1.54383190 | F  | 4.66413818  | 6.29224532  | 1.87332111  |
| C | 0.96501918  | 6.17874733  | -2.11468464 | F  | 2.67271397  | 4.46043055  | 1.87177993  |
| C | -0.47089722 | 6.23382722  | -2.11964601 |    |             |             |             |

**Table S17.** Coordinates of the optimized structure for **Pt-NTNP** at the B3LYP/6-31G(d,p) (for C, N, H) + SDD (for Pt) level of theory.

| E(B3LYP) = -3797.083158             |             |             |             |      |             |             |             |
|-------------------------------------|-------------|-------------|-------------|------|-------------|-------------|-------------|
| Charge = 0, Multiplicity = 1        |             |             |             |      |             |             |             |
| Number of Imaginary Frequencies = 0 |             |             |             |      |             |             |             |
| Atom                                | x           | y           | z           | Atom | x           | y           | z           |
| C                                   | -2.77830735 | 1.16416075  | 0.37809351  | C    | 7.32221999  | 1.29215119  | 2.72344043  |
| C                                   | -4.05830153 | 0.76843950  | 0.96262469  | H    | -2.56708782 | -5.09558533 | -1.58341639 |
| C                                   | -4.07774865 | -0.66236682 | 0.96328450  | H    | 2.43149491  | -5.16438927 | -1.58439779 |
| C                                   | -2.80928413 | -1.09333232 | 0.37862079  | H    | -5.09276376 | 2.56695950  | 1.56396352  |
| N                                   | -2.03260295 | 0.02492675  | 0.15492682  | H    | -5.15997270 | -2.43170986 | 1.56649505  |
| C                                   | -2.38883167 | 2.45603865  | -0.00715885 | H    | 5.09579516  | -2.57744017 | 1.56942504  |
| C                                   | -2.45630681 | -2.39545494 | -0.00731091 | H    | 5.16373114  | 2.42105899  | 1.58420111  |
| C                                   | -1.16433069 | -2.78391119 | -0.39306664 | H    | 2.57745030  | 5.09370500  | -1.56340004 |
| C                                   | -0.76853992 | -4.06288557 | -0.97983751 | H    | -2.42107367 | 5.16139229  | -1.57877447 |
| C                                   | 0.66221157  | -4.08255843 | -0.98009460 | H    | -2.58809440 | -7.26436805 | -2.72429183 |
| C                                   | 1.09311350  | -2.81500482 | -0.39327183 | H    | -1.37022138 | -9.15872412 | -3.74501461 |
| N                                   | -0.02509601 | -2.03865428 | -0.16812764 | H    | 1.12290506  | -9.19341667 | -3.74452680 |
| C                                   | 2.39510310  | -2.46254043 | -0.00686649 | H    | 2.39265407  | -7.33372626 | -2.72377140 |
| C                                   | 2.78371932  | -1.17161614 | 0.38245942  | H    | -7.26268130 | 2.58786015  | 2.70167584  |
| C                                   | 4.06261826  | -0.77740251 | 0.97051837  | H    | -9.15795645 | 1.37008811  | 3.72108444  |
| C                                   | 4.08219257  | 0.65337590  | 0.97476359  | H    | -9.19160127 | -1.12302801 | 3.72251132  |
| C                                   | 2.81477041  | 1.08584313  | 0.38888875  | H    | -7.33003673 | -2.39270996 | 2.70468165  |
| N                                   | 2.03849487  | -0.03185290 | 0.16059602  | H    | 2.60147908  | 7.26482812  | -2.69862527 |
| C                                   | 2.46237435  | 2.38879818  | 0.00581636  | H    | 1.38639990  | 9.16170180  | -3.71833396 |
| C                                   | 1.17151765  | 2.77839184  | -0.38284209 | H    | -1.10670608 | 9.19608097  | -3.72503519 |
| C                                   | 0.77736971  | 4.05883324  | -0.96753580 | H    | -2.37918770 | 7.33369292  | -2.71268809 |
| C                                   | -0.65341507 | 4.07836510  | -0.97194027 | H    | 7.26386978  | -2.60140611 | 2.71047070  |
| C                                   | -1.08590619 | 2.80941919  | -0.38947992 | H    | 9.15809017  | -1.38624767 | 3.73502650  |
| N                                   | 0.03176103  | 2.03253504  | -0.16316510 | H    | 9.19259226  | 1.10685168  | 3.74138094  |
| C                                   | 3.43793998  | -3.53376488 | -0.00928630 | H    | 7.33297604  | 2.37926119  | 2.72384580  |
| C                                   | -3.52797164 | -3.43771062 | -0.00809564 | Pt   | 0.00316904  | -0.00326355 | -0.00403651 |
| C                                   | 3.53350427  | 3.43172874  | 0.01139596  | H    | -4.52696257 | 2.72981494  | -1.68129537 |
| C                                   | -3.43169865 | 3.52722391  | -0.00949502 | H    | -6.23439365 | 4.46667163  | -1.70055045 |
| C                                   | -4.47506462 | 3.52701805  | -0.94512073 | H    | -4.32528606 | 6.33299101  | 1.70111406  |
| C                                   | -5.45038083 | 4.51903163  | -0.95530661 | H    | -2.61950125 | 4.59464086  | 1.67314395  |
| C                                   | -5.42748190 | 5.57358996  | -0.01229425 | H    | 4.60508522  | 2.62067299  | -1.66914231 |
| C                                   | -4.38365809 | 5.56201109  | 0.94284001  | H    | 6.34334331  | 4.32659956  | -1.69177870 |
| C                                   | -3.41103650 | 4.56725722  | 0.92954891  | H    | 4.46854385  | 6.23344542  | 1.70646966  |
| C                                   | -3.53010405 | -4.48198569 | 0.92689634  | H    | 2.73184755  | 4.52596384  | 1.68184314  |
| C                                   | -4.52571905 | -5.45338238 | 0.93861537  | H    | 4.53686166  | -2.73277691 | -1.67697904 |
| C                                   | -5.57650605 | -5.42965428 | -0.00948918 | H    | 6.24433879  | -4.46956270 | -1.69620779 |
| C                                   | -5.57020270 | -4.37792099 | -0.95683613 | H    | 4.32764291  | -6.34333918 | 1.69709142  |
| C                                   | -4.57124608 | -3.40998299 | -0.94381009 | H    | 2.62198641  | -4.60482858 | 1.66922117  |

|   |             |             |             |   |             |             |             |
|---|-------------|-------------|-------------|---|-------------|-------------|-------------|
| C | 4.57584549  | 3.41170706  | -0.92508377 | H | -2.73467209 | -4.53413086 | 1.66501397  |
| C | 5.57057328  | 4.38440292  | -0.93529117 | H | -4.48165797 | -6.23437042 | 1.68781934  |
| C | 5.57977038  | 5.42759890  | 0.02053980  | H | -6.34911901 | -4.31144945 | -1.70655382 |
| C | 4.52284032  | 5.44987917  | 0.96089916  | H | -4.60053433 | -2.61296805 | -1.68148444 |
| C | 3.53090567  | 4.47452223  | 0.94765033  | C | 7.56550399  | -6.43941660 | -0.87019021 |
| C | 3.41517702  | -4.57582906 | 0.92745223  | H | 8.17221248  | -5.55832140 | -0.60820534 |
| C | 4.38774488  | -5.57062980 | 0.94071342  | H | 8.19187416  | -7.32713911 | -0.76877240 |
| C | 5.43368391  | -5.58013811 | -0.01213776 | H | 7.28682776  | -6.35412916 | -1.92665052 |
| C | 5.45864986  | -4.52357590 | -0.95285043 | C | 6.43673007  | 7.55851435  | 0.88283223  |
| C | 4.48332228  | -3.53157348 | -0.94265039 | H | 7.32377513  | 8.18607877  | 0.78288079  |
| C | -1.48606899 | -5.10318496 | -1.54984228 | H | 5.55516412  | 8.16435800  | 0.62041605  |
| C | -0.80165678 | -6.19624457 | -2.12799139 | H | 6.35066516  | 7.27882877  | 1.93895215  |
| C | 0.63637568  | -6.21615868 | -2.12805925 | C | -7.55807206 | 6.43384225  | -0.87228368 |
| C | 1.35070759  | -5.14224196 | -1.55019861 | H | -8.16438071 | 5.55165996  | -0.61305613 |
| C | -5.09973169 | 1.48591954  | 1.53075441  | H | -8.18532544 | 7.32080243  | -0.76967498 |
| C | -6.19332203 | 0.80148451  | 2.10773430  | H | -7.27799172 | 6.35114317  | -1.92858779 |
| C | -6.21272834 | -0.63656508 | 2.10861850  | C | -6.54242143 | -7.46467873 | 0.96966529  |
| C | -5.13805319 | -1.35089584 | 1.53228781  | H | -7.39465599 | -8.12497891 | 0.80408615  |
| C | 5.10297927  | -1.49633441 | 1.53870902  | H | -5.62834044 | -8.07007973 | 0.89356617  |
| C | 6.19585690  | -0.81342681 | 2.11891019  | H | -6.60718553 | -7.08400910 | 1.99893029  |
| C | 6.21563717  | 0.62458531  | 2.12302200  | N | 6.38926219  | -6.58866760 | -0.02982961 |
| C | 5.14172963  | 1.34037106  | 1.54697943  | C | 6.45170039  | -7.52913459 | 1.07603149  |
| C | 1.49633645  | 5.10075636  | -1.53282945 | H | 7.23925362  | -8.25867464 | 0.88048930  |
| C | 0.81346191  | 6.19513674  | -2.11020960 | H | 6.66427454  | -7.04451539 | 2.04220024  |
| C | -0.62456383 | 6.21484944  | -2.11451336 | H | 5.51062956  | -8.08152377 | 1.17635499  |
| C | -1.34038239 | 5.13938310  | -1.54145134 | N | -6.56872508 | -6.39467413 | -0.01025900 |
| C | -1.50107902 | -7.28396126 | -2.72657645 | N | -6.38304144 | 6.58217682  | -0.03005685 |
| C | -0.82252442 | -8.33629013 | -3.29337283 | N | 6.58838820  | 6.38316807  | 0.04158129  |
| C | 0.59811393  | -8.35603431 | -3.29320255 | C | -7.63870687 | -6.33593398 | -0.98877017 |
| C | 1.30554458  | -7.32288664 | -2.72640793 | H | -7.26094851 | -6.40877173 | -2.01851426 |
| C | -7.28205919 | 1.50081612  | 2.70459456  | H | -8.32223867 | -7.16993431 | -0.82465112 |
| C | -8.33484209 | 0.82240249  | 3.27066980  | H | -8.21841970 | -5.40551353 | -0.90989285 |
| C | -8.35400560 | -0.59827186 | 3.27152417  | C | -6.44772103 | 7.52056906  | 1.07742934  |
| C | -7.31992092 | -1.30557036 | 2.70631401  | H | -7.23379949 | 8.25145799  | 0.88094328  |
| C | 1.51444789  | 7.28444573  | -2.70404599 | H | -6.66377061 | 7.03438603  | 2.04206316  |
| C | 0.83750908  | 8.33810632  | -3.27026278 | H | -5.50632185 | 8.07162657  | 1.18158019  |
| C | -0.58314147 | 8.35765756  | -3.27423400 | C | 7.52886428  | 6.44924935  | -1.06408809 |
| C | -1.29207646 | 7.32299867  | -2.71210827 | H | 7.04465879  | 6.66751782  | -2.02923755 |
| C | 7.28353178  | -1.51437613 | 2.71576577  | H | 8.26001372  | 7.23436561  | -0.86471125 |
| C | 8.33571761  | -0.83739099 | 3.28467328  | H | 8.07936880  | 5.50765172  | -1.16893922 |
| C | 8.35533961  | 0.58325418  | 3.28844740  |   |             |             |             |



**Table S18.** Coordinates of the optimized structure for **Zn-TNP** at the B3LYP/6-31G(d,p) (for C, N, Si, H) + SDD (for Zn) level of theory.

| E(B3LYP) = -4384.108639             |             |             |             |      |             |             |             |
|-------------------------------------|-------------|-------------|-------------|------|-------------|-------------|-------------|
| Charge = 0, Multiplicity = 1        |             |             |             |      |             |             |             |
| Number of Imaginary Frequencies = 0 |             |             |             |      |             |             |             |
| Atom                                | x           | y           | z           | Atom | x           | y           | z           |
| Zn                                  | -0.01255676 | 0.01282031  | -0.00378972 | C    | 0.75196804  | 8.35112471  | -3.33080253 |
| Si                                  | 5.65817381  | -5.51072974 | -0.08068418 | C    | 5.27292240  | 6.89647519  | -1.16851584 |
| Si                                  | 5.67311370  | 5.52067568  | 0.06432925  | C    | 7.29091169  | 4.67088861  | -0.41475744 |
| Si                                  | -5.68195266 | 5.53486144  | -0.07683757 | C    | -0.66780785 | 8.35424813  | -3.34525546 |
| Si                                  | -5.53401100 | -5.65849100 | 0.08026021  | C    | -5.84844330 | 6.26471275  | 1.65886660  |
| N                                   | 2.03086387  | 0.00421927  | 0.18864204  | C    | -5.25361492 | 6.90434416  | -1.30733511 |
| N                                   | -0.01913021 | -2.03248980 | -0.19364287 | C    | -7.28493151 | 4.67756299  | -0.59066508 |
| N                                   | -0.00385376 | 2.05806002  | -0.19250383 | C    | -4.67734868 | -7.25930224 | 0.60168979  |
| N                                   | -2.05583408 | 0.01936237  | 0.18852193  | C    | -6.26067137 | -5.83157080 | -1.65611547 |
| C                                   | -1.14504108 | -2.78519856 | -0.41566796 | C    | -6.90580993 | -5.22547653 | 1.30659849  |
| C                                   | -2.81654684 | -1.09856804 | 0.43196350  | H    | 5.08916967  | -2.51704186 | 1.60283657  |
| C                                   | 4.05388422  | -0.72583395 | 1.01122002  | H    | 5.10017088  | 2.48150601  | 1.65554990  |
| C                                   | 4.05713472  | 0.70790918  | 1.02607571  | H    | -5.11085742 | 2.54245339  | 1.60156322  |
| C                                   | 2.78992074  | 1.12191349  | 0.43321855  | H    | 2.45741684  | -5.12059642 | -1.63322816 |
| C                                   | 0.68399282  | -4.06330921 | -1.02369310 | H    | -7.28073085 | 2.55472893  | 2.76664712  |
| C                                   | -4.08658976 | -0.68384878 | 1.01900524  | H    | 9.13985086  | 1.19652164  | 3.83440483  |
| C                                   | -1.12162591 | 2.81828692  | -0.43430241 | H    | 7.26132163  | -2.52510884 | 2.76750222  |
| C                                   | 2.78395779  | -1.12192316 | 0.41244190  | H    | -5.14342469 | -2.45734874 | 1.62883407  |
| C                                   | 1.09859566  | -2.79318628 | -0.43725053 | H    | 2.51787767  | 5.13103773  | -1.58003684 |
| C                                   | 5.09732830  | -1.43637910 | 1.58028433  | H    | 7.27096229  | 2.45552096  | 2.82201345  |
| C                                   | -2.44138272 | -2.40255452 | 0.02007997  | H    | -9.16190437 | 1.32928023  | 3.79811266  |
| C                                   | 6.18228006  | 0.69334620  | 2.18783334  | H    | -2.54256053 | -5.08836325 | -1.60450085 |
| C                                   | 6.17930206  | -0.74526030 | 2.17238218  | H    | 9.13501286  | -1.29581816 | 3.80708627  |
| C                                   | 2.40245906  | -2.41773601 | -0.02424378 | H    | 7.51324440  | -3.83055856 | 0.07011686  |
| C                                   | 2.41834353  | 2.42633558  | 0.01392964  | H    | 8.09665247  | -5.36280379 | -0.59942650 |
| C                                   | 3.43636942  | 3.42623122  | 0.01938842  | H    | 7.17325622  | -4.24268689 | -1.61382065 |
| C                                   | 1.12220063  | 2.81237844  | -0.41411193 | H    | 6.63233610  | -6.98285533 | 1.68695629  |
| C                                   | -0.74983665 | -4.05685182 | -1.01145345 | H    | 6.06880721  | -5.46166448 | 2.39431673  |
| C                                   | 5.10354380  | 1.40160491  | 1.61020395  | H    | 4.90407013  | -6.72311911 | 1.97413971  |
| C                                   | 3.41830927  | -3.41946172 | -0.05104478 | H    | -2.48315321 | 5.14229894  | -1.63073590 |
| C                                   | -4.08005983 | 0.74988144  | 1.00716828  | H    | -7.31682756 | -2.42579944 | 2.79193232  |
| C                                   | -6.21716771 | -0.66621239 | 2.17077716  | H    | -2.55493836 | -7.25926811 | -2.76763412 |
| C                                   | -2.42610768 | 2.44201181  | -0.02328031 | H    | 2.42560062  | -7.29491984 | -2.79454768 |
| C                                   | -6.20760347 | 0.77233922  | 2.16335765  | H    | -9.17886588 | -1.16313303 | 3.81119090  |
| C                                   | -5.12226154 | 1.46194803  | 1.57580020  | H    | 1.16277598  | -9.15789125 | -3.81182646 |
| C                                   | 1.37701846  | -5.11663306 | -1.59660640 | H    | 4.29016289  | -7.38311358 | -1.02790454 |
| C                                   | -2.80849418 | 1.14540983  | 0.41093490  | H    | 5.11188684  | -6.49058878 | -2.32129690 |
| C                                   | 0.72585505  | 4.08651701  | -1.00455686 | H    | 6.01425216  | -7.64299480 | -1.32796066 |

|   |             |             |             |   |             |             |             |
|---|-------------|-------------|-------------|---|-------------|-------------|-------------|
| C | -0.70794937 | 4.08980347  | -1.01890488 | H | -1.32967128 | -9.14113755 | -3.79793827 |
| C | 0.66615409  | -6.19479891 | -2.17372608 | H | 2.52410520  | 7.30220692  | -2.74439290 |
| C | -7.29458455 | 1.46760208  | 2.76713239  | H | -2.45608306 | 7.31310686  | -2.79508353 |
| C | 8.31299813  | 0.66701093  | 3.37001664  | H | 6.59139149  | 6.98918350  | 1.86463362  |
| C | 7.26928977  | -1.43794957 | 2.77387819  | H | 4.85617150  | 6.72388594  | 2.10020232  |
| C | -5.13943459 | -1.37696720 | 1.59251256  | H | 6.01146625  | 5.46393036  | 2.54990829  |
| C | 1.43699119  | 5.13504904  | -1.56312216 | H | 1.29476777  | 9.17626238  | -3.78288714 |
| C | 7.27482909  | 1.36846950  | 2.80443445  | H | 4.32967400  | 7.39288663  | -0.91834125 |
| C | 4.30076377  | -4.26655845 | -0.07260538 | H | 6.06151070  | 7.65760824  | -1.16498511 |
| C | -0.77248644 | -6.18534733 | -2.16585053 | H | 5.19249493  | 6.50602567  | -2.18856505 |
| C | -3.44183540 | 3.44389023  | -0.04953384 | H | 7.52727559  | 3.84299526  | 0.26162661  |
| C | -8.33942656 | 0.78487499  | 3.34321604  | H | 8.12611235  | 5.38000470  | -0.38261704 |
| C | -1.46201513 | -5.09964788 | -1.57904663 | H | 7.23559542  | 4.26298474  | -1.42922541 |
| C | 8.31021201  | -0.75305992 | 3.35448593  | H | -1.19766774 | 9.18173799  | -3.80825567 |
| C | -3.44325543 | -3.41822523 | 0.04826375  | H | -4.92013243 | 6.75380006  | 1.97124013  |
| C | 7.25931298  | -4.65549924 | -0.60349738 | H | -6.08278580 | 5.49327477  | 2.39990253  |
| C | -0.69384852 | 6.22221913  | -2.16622288 | H | -6.64961401 | 7.01214186  | 1.69015398  |
| C | 4.31877169  | 4.27363730  | 0.02799332  | H | -5.14433067 | 6.50807544  | -2.32243847 |
| C | 5.83127076  | -6.23527954 | 1.65657273  | H | -6.04458026 | 7.66268173  | -1.32972296 |
| C | -1.40287299 | 5.14147519  | -1.59175666 | H | -4.31918385 | 7.40567753  | -1.03480187 |
| C | 0.74467113  | 6.21901607  | -2.15163629 | H | -8.12250474 | 5.38458404  | -0.58497725 |
| C | -7.31396159 | -1.33922568 | 2.78215035  | H | -7.20289343 | 4.26219059  | -1.60027766 |
| C | -1.46780447 | -7.27298470 | -2.76850583 | H | -7.53581032 | 3.85425969  | 0.08608542  |
| C | -4.32423642 | 4.29107490  | -0.07046545 | H | -4.26367258 | -7.17340111 | 1.61167421  |
| C | 1.33902402  | -7.29212403 | -2.78443509 | H | -3.85287347 | -7.51241772 | -0.07279907 |
| C | -4.29050848 | -4.30050468 | 0.07102333  | H | -5.38414752 | -8.09707264 | 0.59790952  |
| C | -8.34889751 | -0.63505886 | 3.35064977  | H | -7.00821076 | -6.63270002 | -1.68567107 |
| C | 0.63478954  | -8.32757172 | -3.35181320 | H | -5.48789733 | -6.06898353 | -2.39477733 |
| C | 5.22420622  | -6.88371339 | -1.30529962 | H | -6.74896386 | -4.90438657 | -1.97304644 |
| C | -0.78519713 | -8.31821931 | -3.34391589 | H | -7.40648342 | -4.29199378 | 1.02958907  |
| C | 1.43753243  | 7.30972034  | -2.75159553 | H | -6.51148546 | -5.11252808 | 2.32206230  |
| C | -1.36956183 | 7.31588981  | -2.78013053 | H | -7.66433038 | -6.01622006 | 1.33044866  |
| C | 5.79361334  | 6.23959948  | 1.80829061  |   |             |             |             |

**Table S19.** Coordinates of the optimized structure for **Pt-ATNP** at the B3LYP/6-31G(d,p) (for C, N, H) + SDD (for Pt) level of theory.

| E(B3LYP) = -2641.551340             |             |            |             |      |             |             |             |
|-------------------------------------|-------------|------------|-------------|------|-------------|-------------|-------------|
| Charge = 0, Multiplicity = 1        |             |            |             |      |             |             |             |
| Number of Imaginary Frequencies = 0 |             |            |             |      |             |             |             |
| Atom                                | x           | y          | z           | Atom | x           | y           | z           |
| Pt                                  | 0.00000000  | 0.00000000 | 0.00000000  | C    | 0.65998416  | -4.22169019 | 0.27936911  |
| N                                   | -0.00002601 | 2.03712948 | -0.00005087 | C    | -0.66533923 | -6.64443590 | -0.27164207 |
| C                                   | 1.05057872  | 2.82274502 | -0.40663404 | C    | 2.33187117  | -2.33183632 | 0.74846886  |
| C                                   | -0.65998416 | 4.22169019 | 0.27936911  | C    | -0.65967011 | -4.22169019 | -0.28009943 |

|   |             |             |             |   |              |              |             |
|---|-------------|-------------|-------------|---|--------------|--------------|-------------|
| C | 0.66533923  | 6.64443590  | -0.27164207 | C | -1.31062372  | -5.41591578  | -0.54085943 |
| C | -2.33187117 | 2.33183632  | 0.74846886  | C | 0.66612525   | -6.64443352  | 0.26978687  |
| C | 0.65967011  | 4.22169019  | -0.28009943 | C | 3.20274378   | -3.20282184  | 1.47053580  |
| C | 1.31062372  | 5.41591578  | -0.54085943 | C | 1.31116558   | -5.41591626  | 0.53958676  |
| C | -0.66612525 | 6.64443352  | 0.26978687  | C | 1.05069748   | -2.82272089  | 0.40635227  |
| C | -3.20274378 | 3.20282184  | 1.47053580  | C | 1.30151395   | -7.89319213  | 0.52587294  |
| C | -1.31116558 | 5.41591626  | 0.53958676  | C | -1.30045860  | -7.89319022  | -0.52838504 |
| C | -1.05069748 | 2.82272089  | 0.40635227  | C | -0.65759709  | -9.07999784  | -0.26771913 |
| C | -1.30151395 | 7.89319213  | 0.52587294  | C | 0.65891177   | -9.07999784  | 0.26457421  |
| C | 1.30045860  | 7.89319022  | -0.52838504 | H | 2.30909932   | 5.43120842   | -0.95361043 |
| C | 0.65759709  | 9.07999784  | -0.26771913 | H | -2.30965789  | 5.43120974   | 0.95230391  |
| C | -0.65891177 | 9.07999784  | 0.26457421  | H | -2.30927772  | 7.89010179   | 0.93320784  |
| N | 2.03712948  | 0.00002601  | 0.00005087  | H | 2.30822006   | 7.89009491   | -0.93572556 |
| C | 2.82274502  | -1.05057872 | 0.40663404  | H | 1.15468366   | 10.02466110  | -0.46831619 |
| C | 4.22169019  | 0.65998416  | -0.27936911 | H | -1.15619818  | 10.02466284  | 0.46466525  |
| C | 6.64443590  | -0.66533923 | 0.27164207  | H | 5.43120842   | -2.30909932  | 0.95361043  |
| C | 2.33183632  | 2.33187117  | -0.74846886 | H | 5.43120974   | 2.30965789   | -0.95230391 |
| C | 4.22169019  | -0.65967011 | 0.28009943  | H | 7.89010179   | 2.30927772   | -0.93320784 |
| C | 5.41591578  | -1.31062372 | 0.54085943  | H | 7.89009491   | -2.30822006  | 0.93572556  |
| C | 6.64443352  | 0.66612525  | -0.26978687 | H | 10.02466110  | -1.15468366  | 0.46831619  |
| C | 3.20282184  | 3.20274378  | -1.47053580 | H | 10.02466284  | 1.15619818   | -0.46466525 |
| C | 5.41591626  | 1.31116558  | -0.53958676 | H | -5.43120842  | 2.30909932   | 0.95361043  |
| C | 2.82272089  | 1.05069748  | -0.40635227 | H | -5.43120974  | -2.30965789  | -0.95230391 |
| C | 7.89319213  | 1.30151395  | -0.52587294 | H | -7.89010179  | -2.30927772  | -0.93320784 |
| C | 7.89319022  | -1.30045860 | 0.52838504  | H | -7.89009491  | 2.30822006   | 0.93572556  |
| C | 9.07999784  | -0.65759709 | 0.26771913  | H | -10.02466110 | 1.15468366   | 0.46831619  |
| C | 9.07999784  | 0.65891177  | -0.26457421 | H | -10.02466284 | -1.15619818  | -0.46466525 |
| N | -2.03712948 | -0.00002601 | 0.00005087  | H | -2.30909932  | -5.43120842  | -0.95361043 |
| C | -2.82274502 | 1.05057872  | 0.40663404  | H | 2.30965789   | -5.43120974  | 0.95230391  |
| C | -4.22169019 | -0.65998416 | -0.27936911 | H | 2.30927772   | -7.89010179  | 0.93320784  |
| C | -6.64443590 | 0.66533923  | 0.27164207  | H | -2.30822006  | -7.89009491  | -0.93572556 |
| C | -2.33183632 | -2.33187117 | -0.74846886 | H | -1.15468366  | -10.02466110 | -0.46831619 |
| C | -4.22169019 | 0.65967011  | 0.28009943  | H | 1.15619818   | -10.02466284 | 0.46466525  |
| C | -5.41591578 | 1.31062372  | 0.54085943  | C | -3.91000105  | -3.90977841  | -2.15533805 |
| C | -6.64443352 | -0.66612525 | -0.26978687 | H | -4.52534238  | -4.52498872  | -2.77022824 |
| C | -3.20282184 | -3.20274378 | -1.47053580 | C | 3.90977841   | -3.91000105  | 2.15533805  |
| C | -5.41591626 | -1.31116558 | -0.53958676 | H | 4.52498872   | -4.52534238  | 2.77022824  |
| C | -2.82272089 | -1.05069748 | -0.40635227 | C | -3.90977841  | 3.91000105   | 2.15533805  |
| C | -7.89319213 | -1.30151395 | -0.52587294 | H | -4.52498872  | 4.52534238   | 2.77022824  |
| C | -7.89319022 | 1.30045860  | 0.52838504  | C | 3.91000105   | 3.90977841   | -2.15533805 |
| C | -9.07999784 | 0.65759709  | 0.26771913  | H | 4.52534238   | 4.52498872   | -2.77022824 |
| C | -9.07999784 | -0.65891177 | -0.26457421 |   |              |              |             |
| N | 0.00002601  | -2.03712948 | -0.00005087 |   |              |              |             |
| C | -1.05057872 | -2.82274502 | -0.40663404 |   |              |              |             |

**Table S20.** Coordinates of the optimized structure for **Pt-ACNTNP** at the B3LYP/6-31G(d,p) (for C, N, H) + SDD (for Pt) level of theory.

| E(B3LYP) = -3010.531770             |             |             |             |      |             |             |             |
|-------------------------------------|-------------|-------------|-------------|------|-------------|-------------|-------------|
| Charge = 0, Multiplicity = 1        |             |             |             |      |             |             |             |
| Number of Imaginary Frequencies = 0 |             |             |             |      |             |             |             |
| Atom                                | x           | y           | z           | Atom | x           | y           | z           |
| Pt                                  | 0.00000250  | -0.00000886 | -0.00005192 | C    | -5.47408876 | 3.83367698  | -0.23008668 |
| N                                   | 1.33337424  | 1.54371452  | -0.00319900 | C    | -4.49683751 | -0.32319577 | -1.47864055 |
| C                                   | 2.64040608  | 1.45421454  | -0.41124435 | C    | -4.96502985 | 2.54324770  | -0.50502123 |
| C                                   | 2.25910040  | 3.63271158  | 0.25886996  | C    | -2.82607180 | 1.05459749  | -0.39633008 |
| C                                   | 4.84274941  | 4.60125111  | -0.30426507 | C    | -6.83653116 | 4.16412183  | -0.47577921 |
| C                                   | -0.23875237 | 3.28478472  | 0.75024242  | C    | -5.12970368 | 6.13725988  | 0.57074451  |
| C                                   | 3.25915554  | 2.76736243  | -0.29409907 | C    | -6.45178802 | 6.42195571  | 0.32111422  |
| C                                   | 4.53078177  | 3.24574113  | -0.55989470 | C    | -7.31363329 | 5.42563920  | -0.20709384 |
| C                                   | 3.83363911  | 5.47409088  | 0.23066521  | N    | -1.33336880 | -1.54372931 | -0.00346245 |
| C                                   | -0.32332238 | 4.49672741  | 1.47882777  | C    | -2.64038740 | -1.45417063 | -0.41154387 |
| C                                   | 2.54319583  | 4.96499862  | 0.50547234  | C    | -2.25910004 | -3.63276687 | 0.25824912  |
| C                                   | 1.05457323  | 2.82603902  | 0.39652242  | C    | -4.84273427 | -4.60121849 | -0.30511087 |
| C                                   | 4.16405135  | 6.83652015  | 0.47647285  | C    | 0.23872879  | -3.28490360 | 0.74981148  |
| C                                   | 6.13728036  | 5.12978497  | -0.57002903 | C    | -3.25914057 | -2.76733242 | -0.29461186 |
| C                                   | 6.42194433  | 6.45185597  | -0.32029020 | C    | -4.53076178 | -3.24566759 | -0.56051256 |
| C                                   | 5.42558226  | 7.31365451  | 0.20790716  | C    | -3.83363385 | -5.47414623 | 0.22969577  |
| N                                   | 1.54372722  | -1.33337673 | 0.00322765  | C    | 0.32323898  | -4.49693561 | 1.47825701  |
| C                                   | 1.45419013  | -2.64042171 | 0.41123464  | C    | -2.54319892 | -4.96509701 | 0.50462025  |
| C                                   | 3.63276301  | -2.25907571 | -0.25861100 | C    | -1.05458049 | -2.82611197 | 0.39607354  |
| C                                   | 4.60126910  | -4.84272339 | 0.30458229  | C    | -4.16404936 | -6.83661794 | 0.47526607  |
| C                                   | 3.28487296  | 0.23878563  | -0.74997269 | C    | -6.13725935 | -5.12970976 | -0.57098972 |
| C                                   | 2.76735849  | -3.25915474 | 0.29422838  | C    | -6.42192650 | -6.45182279 | -0.32147895 |
| C                                   | 3.24572307  | -4.53078102 | 0.56005135  | C    | -5.42557363 | -7.31370896 | 0.20659373  |
| C                                   | 5.47416232  | -3.83358769 | -0.23021272 | H    | 5.30276546  | 2.60944862  | -0.96806618 |
| C                                   | 4.49687611  | 0.32336373  | -1.47845620 | H    | 1.80173265  | 5.63761612  | 0.91213503  |
| C                                   | 4.96508571  | -2.54314536 | -0.50505224 | H    | 3.40025473  | 7.49432573  | 0.88233757  |
| C                                   | 2.82609515  | -1.05455327 | -0.39632749 | H    | 6.89827773  | 4.46872900  | -0.97587342 |
| C                                   | 6.83662794  | -4.16397420 | -0.47585440 | H    | 7.41349989  | 6.84294526  | -0.52738070 |
| C                                   | 5.12978768  | -6.13725348 | 0.57038079  | H    | 5.66517271  | 8.35515297  | 0.39999375  |
| C                                   | 6.45189433  | -6.42189252 | 0.32080275  | H    | 2.60939210  | -5.30278440 | 0.96812479  |
| C                                   | 7.31374611  | -5.42550500 | -0.20725980 | H    | 5.63774418  | -1.80166061 | -0.91160791 |
| N                                   | -1.54372078 | 1.33335966  | 0.00333611  | H    | 7.49447422  | -3.40015795 | -0.88161607 |
| C                                   | -1.45419345 | 2.64035347  | 0.41149084  | H    | 4.46869112  | -6.89827048 | 0.97612231  |
| C                                   | -3.63272883 | 2.25911882  | -0.25852929 | H    | 6.84297130  | -7.41344776 | 0.52791805  |
| C                                   | -4.60120207 | 4.84274107  | 0.30485628  | H    | 8.35527246  | -5.66507598 | -0.39921966 |
| C                                   | -3.28483974 | -0.23869733 | -0.75013665 | H    | -2.60934865 | 5.30268502  | 0.96856161  |
| C                                   | -2.76733761 | 3.25912418  | 0.29446224  | H    | -5.63768365 | 1.80182213  | -0.91169191 |
| C                                   | -3.24568045 | 4.53073881  | 0.56037708  | H    | -7.49437267 | 3.40036079  | -0.88165272 |

|   |             |             |             |   |             |             |             |
|---|-------------|-------------|-------------|---|-------------|-------------|-------------|
| C | -5.49113425 | -0.39100905 | -2.18276013 | H | -4.46861201 | 6.89822179  | 0.97659727  |
| C | 0.39104003  | -5.49127194 | 2.18232039  | H | -6.84285255 | 7.41350126  | 0.52829934  |
| C | -0.39123540 | 5.49097052  | 2.18301413  | H | -8.35514217 | 5.66525436  | -0.39909332 |
| C | 5.49117743  | 0.39123140  | -2.18256252 | H | -5.30273720 | -2.60930800 | -0.96859665 |
| C | -6.61761937 | -0.46838662 | -2.95127520 | H | -1.80174369 | -5.63778170 | 0.91118556  |
| C | 0.46841004  | -6.61777113 | 2.95080834  | H | -3.40026029 | -7.49449062 | 0.88103621  |
| C | 6.61764683  | 0.46872632  | -2.95108199 | H | -6.89824926 | -4.46858684 | -0.97673910 |
| C | -0.46873706 | 6.61737811  | 2.95162774  | H | -7.41347718 | -6.84287885 | -0.52865538 |
| N | -7.58679522 | -0.53519136 | -3.60194108 | H | -5.66516662 | -8.35524023 | 0.39849967  |
| N | 0.53519218  | -7.58697191 | 3.60143941  | N | -0.53563887 | 7.58649317  | 3.60237414  |
| N | 7.58682401  | 0.53561091  | -3.60173787 |   |             |             |             |

**Table S21.** Coordinates of the optimized structure for **Pt-AFTNP** at the B3LYP/6-31G(d,p) (for C, N, F, H) + SDD (for Pt) level of theory.

| E(B3LYP) = -3989.677076             |             |             |             |      |             |             |             |
|-------------------------------------|-------------|-------------|-------------|------|-------------|-------------|-------------|
| Charge = 0, Multiplicity = 1        |             |             |             |      |             |             |             |
| Number of Imaginary Frequencies = 0 |             |             |             |      |             |             |             |
| Atom                                | x           | y           | z           | Atom | x           | y           | z           |
| Pt                                  | -0.00001013 | -0.00001683 | 0.00004580  | H    | -3.16591916 | -7.58275453 | -0.99471949 |
| N                                   | -1.58982284 | 1.28146545  | 0.00329544  | H    | -5.41086420 | -8.51998390 | -0.53857655 |
| C                                   | -2.86273283 | 0.95665855  | 0.40169038  | H    | -7.20573712 | -7.07609414 | 0.40770736  |
| C                                   | -2.87585722 | 3.17347693  | -0.25543910 | H    | 1.62733532  | 5.69168661  | -0.97110438 |
| C                                   | -5.59112033 | 3.66419253  | 0.30795909  | H    | 5.22950232  | 2.79389684  | 0.91416575  |
| C                                   | -0.35413950 | 3.28425886  | -0.72247116 | H    | 6.75969007  | 4.69181164  | 0.89898368  |
| C                                   | -3.70627574 | 2.14105511  | 0.29163093  | H    | 3.16503352  | 7.58329821  | -0.99303643 |
| C                                   | -5.04247358 | 2.38625529  | 0.56177016  | H    | 5.40991226  | 8.52067273  | -0.53677332 |
| C                                   | -4.75725726 | 4.70072465  | -0.23290766 | H    | 7.20508560  | 7.07665962  | 0.40871102  |
| C                                   | -0.49194358 | 4.53464602  | -1.38448652 | H    | 5.69156479  | -1.62758208 | 0.97153915  |
| C                                   | -3.39642743 | 4.43235392  | -0.50599643 | H    | 2.79362572  | -5.22975789 | -0.91347019 |
| C                                   | -1.54308963 | 2.59658888  | -0.38638719 | H    | 4.69138910  | -6.76018231 | -0.89772058 |
| C                                   | -5.32688758 | 5.98078931  | -0.48524505 | H    | 7.58299239  | -3.16546028 | 0.99400487  |
| C                                   | -6.95838068 | 3.95267504  | 0.58006881  | H    | 8.52018287  | -5.41054082 | 0.53834430  |
| C                                   | -7.47592444 | 5.20116431  | 0.32626594  | H    | 7.07610616  | -7.20574257 | -0.40699858 |
| C                                   | -6.65244119 | 6.22485708  | -0.21265389 | C    | 5.55693892  | 0.60603168  | 2.02484691  |
| N                                   | -1.28152169 | -1.58980143 | -0.00301877 | C    | 0.60615931  | -5.55645790 | -2.02571765 |
| C                                   | -0.95673396 | -2.86273592 | -0.40147549 | C    | -0.60620975 | 5.55641070  | -2.02581509 |
| C                                   | -3.17362445 | -2.87573785 | 0.25541672  | C    | -5.55622549 | -0.60617848 | 2.02638951  |
| C                                   | -3.66455281 | -5.59086379 | -0.30841630 | C    | -0.75128768 | 6.88010023  | -2.61041335 |
| C                                   | -3.28426897 | -0.35405328 | 0.72274921  | C    | -6.87992443 | -0.75157793 | 2.61090479  |
| C                                   | -2.14121012 | -3.70618289 | -0.29163101 | C    | 0.75176470  | -6.87999428 | -2.61056375 |
| C                                   | -2.38652695 | -5.04232157 | -0.56198117 | C    | 6.88063734  | 0.75143164  | 2.60932644  |
| C                                   | -4.70107460 | -4.75697056 | 0.23242588  | F    | 0.77089810  | -6.85348758 | -3.95561323 |
| C                                   | -4.53459103 | -0.49187841 | 1.38486532  | F    | -0.26893163 | -7.68916318 | -2.23670940 |
| C                                   | -4.43258960 | -3.39621741 | 0.50574509  | F    | 1.90316205  | -7.46584456 | -2.20150730 |

|   |             |             |             |   |             |             |             |
|---|-------------|-------------|-------------|---|-------------|-------------|-------------|
| C | -2.59663085 | -1.54303392 | 0.38658328  | F | 7.68961383  | -0.26926861 | 2.23506222  |
| C | -5.98123864 | -5.32649911 | 0.48448312  | F | 6.85454096  | 0.77032524  | 3.95438482  |
| C | -3.95313970 | -6.95805364 | -0.58077874 | F | 7.46647735  | 1.90284084  | 2.20019887  |
| C | -5.20172468 | -7.47549861 | -0.32724333 | F | 0.26916019  | 7.68913890  | -2.23557334 |
| C | -6.22540885 | -6.65198445 | 0.21165104  | F | -0.76948738 | 6.85399226  | -3.95547973 |
| N | 1.28147946  | 1.58980141  | -0.00324529 | F | -1.90294000 | 7.46590711  | -2.20194340 |
| C | 0.95660564  | 2.86274679  | -0.40141902 | F | -7.68906507 | 0.26882624  | 2.23619813  |
| C | 3.17352496  | 2.87581348  | 0.25535430  | F | -7.46553722 | -1.90325196 | 2.20228764  |
| C | 3.66402313  | 5.59121670  | -0.30756002 | F | -6.85386954 | -0.76989997 | 3.95597988  |
| C | 3.28433412  | 0.35406471  | 0.72224023  | C | 3.70622113  | -2.14110667 | 0.29157322  |
| C | 2.14097138  | 3.70630726  | -0.29134802 | C | 5.04244072  | -2.38628104 | 0.56165425  |
| C | 2.38603955  | 5.04259133  | -0.56119104 | C | 4.75695418  | -4.70108381 | -0.23197881 |
| C | 4.70072636  | 4.75724793  | 0.23282126  | C | 0.49178717  | -4.53472237 | -1.38436774 |
| C | 4.53489238  | 0.49186559  | 1.38395823  | C | 3.39614166  | -4.43271059 | -0.50509690 |
| C | 4.43245931  | 3.39635806  | 0.50569264  | C | 1.54298521  | -2.59670278 | -0.38622558 |
| C | 2.59666842  | 1.54304216  | 0.38625316  | C | 5.32646133  | -5.98131796 | -0.48374612 |
| C | 5.98084530  | 5.32686155  | 0.48494149  | C | 6.95822753  | -3.95283350 | 0.58045483  |
| C | 3.95239121  | 6.95855880  | -0.57941850 | C | 7.47564281  | -5.20148185 | 0.32720095  |
| C | 5.20093101  | 7.47607568  | -0.32583434 | C | 6.65201568  | -6.22536186 | -0.21115885 |
| C | 6.22479379  | 6.65248569  | 0.21260703  | H | -5.69147160 | 1.62769449  | 0.97209223  |
| N | 1.58977805  | -1.28152813 | 0.00317518  | H | -2.79403784 | 5.22927500  | -0.91480156 |
| C | 2.86275191  | -0.95667580 | 0.40140591  | H | -4.69190783 | 6.75949549  | -0.89965517 |
| C | 2.87569555  | -3.17366759 | -0.25507281 | H | -7.58306325 | 3.16545487  | 0.99403579  |
| C | 5.59095740  | -3.66436706 | 0.30832768  | H | -8.52046826 | 5.41021834  | 0.53739549  |
| C | 0.35397868  | -3.28432121 | -0.72236248 | H | -7.07663046 | 7.20510872  | -0.40892211 |
| H | -5.22950647 | -2.79378675 | 0.91449538  | H | -1.62799535 | -5.69136381 | -0.97228269 |
| H | -6.75993979 | -4.69149721 | 0.89887306  |   |             |             |             |

**Table S22.** Coordinates of the optimized structure for **Pt-ANTNP** at the B3LYP/6-31G(d,p) (for C, N, H) + SDD (for Pt) level of theory.

| E(B3LYP) = -2862.979998             |             |             |            |      |             |             |            |
|-------------------------------------|-------------|-------------|------------|------|-------------|-------------|------------|
| Charge = 0, Multiplicity = 1        |             |             |            |      |             |             |            |
| Number of Imaginary Frequencies = 0 |             |             |            |      |             |             |            |
| Atom                                | x           | y           | z          | Atom | x           | y           | z          |
| Pt                                  | 0.00012474  | 0.00009290  | 0.00048584 | C    | 4.33886891  | 2.05711306  | 0.60854331 |
| N                                   | -1.90268905 | 0.72665968  | 0.15240065 | C    | 5.23806217  | -0.66072380 | 1.66861849 |
| C                                   | -2.23231646 | 2.05923503  | 0.18655828 | C    | 2.98320092  | 0.03237776  | 0.55451216 |
| C                                   | -4.02550570 | 0.86683441  | 1.03053822 | C    | 7.27354340  | -1.60048414 | 2.72732330 |
| C                                   | -5.55929620 | 3.10173480  | 1.79387680 | C    | 6.36692837  | -4.20319192 | 2.20042568 |
| C                                   | -3.09519802 | -1.41926687 | 0.33172397 | C    | 7.56792291  | -4.00393516 | 2.83839949 |
| C                                   | -3.55961723 | 2.19604532  | 0.77027735 | C    | 8.02654305  | -2.68631647 | 3.10577908 |
| C                                   | -4.31721829 | 3.29310524  | 1.14766674 | H    | -3.96849000 | 4.30170506  | 0.97435657 |
| C                                   | -6.02511087 | 1.76716635  | 2.06084863 | H    | -5.58458759 | -0.33732753 | 1.89592562 |
| C                                   | -4.33802504 | -2.05754275 | 0.60948498 | H    | -7.62108125 | 0.59105232  | 2.93372019 |

|   |             |             |             |   |             |             |             |
|---|-------------|-------------|-------------|---|-------------|-------------|-------------|
| C | -5.23789337 | 0.66076244  | 1.66837834  | H | -6.00929249 | 5.20972234  | 1.99765721  |
| C | -2.98297272 | -0.03224716 | 0.55444856  | H | -8.17053530 | 4.85405728  | 3.14483514  |
| C | -7.27318441 | 1.60051153  | 2.72745448  | H | -8.97577755 | 2.54160994  | 3.61338055  |
| C | -6.36584435 | 4.20327624  | 2.20204665  | H | 4.30167627  | 3.96907456  | -0.97314823 |
| C | -7.56689895 | 4.00398279  | 2.83988981  | H | -0.33748554 | 5.58278521  | -1.89825755 |
| C | -8.02589375 | 2.68633862  | 3.10650169  | H | 0.59077498  | 7.61865619  | -2.93757934 |
| N | 0.72671383  | 1.90278300  | -0.15148814 | H | 5.20950094  | 6.00954682  | -1.99724134 |
| C | 2.05922597  | 2.23252650  | -0.18551214 | H | 4.85370469  | 8.16955627  | -3.14659675 |
| C | 0.86683701  | 4.02515800  | -1.03053004 | H | 2.54123329  | 8.97347171  | -3.61734611 |
| C | 3.10155621  | 5.55895858  | -1.79416711 | H | -4.30180291 | -3.96673985 | -0.97514978 |
| C | -1.41923766 | 3.09539954  | -0.33101995 | H | 0.33683042  | -5.58386727 | -1.89715881 |
| C | 2.19605506  | 3.55974088  | -0.76945830 | H | -0.59198895 | -7.61925591 | -2.93635611 |
| C | 3.29303233  | 4.31745660  | -1.14688236 | H | -5.21038095 | -6.00694268 | -1.99977645 |
| C | 1.76696735  | 6.02403336  | -2.06238161 | H | -4.85512576 | -8.16742099 | -3.14841579 |
| C | -2.05693511 | 4.33877686  | -0.60759653 | H | -2.54284713 | -8.97295306 | -3.61727548 |
| C | 0.66063922  | 5.23680359  | -1.66973735 | H | 3.96939194  | -4.30157707 | 0.97325710  |
| C | -0.03221972 | 2.98288955  | -0.55387032 | H | 5.58444556  | 0.33730435  | 1.89682137  |
| C | 1.60024532  | 7.27138568  | -2.73031534 | H | 7.62112956  | -0.59103959 | 2.93419179  |
| C | 4.20302262  | 6.36553277  | -2.20247480 | H | 6.01063994  | -5.20963007 | 1.99552724  |
| C | 4.00366666  | 7.56591151  | -2.84156806 | H | 8.17178014  | -4.85401683 | 3.14288356  |
| C | 2.68601137  | 8.02414895  | -3.10943296 | H | 8.97636404  | -2.54161441 | 3.61278434  |
| N | -0.72646611 | -1.90250841 | -0.15198802 | C | 2.62914571  | -5.38176035 | -0.85583520 |
| C | -2.05903094 | -2.23199645 | -0.18629025 | C | 5.38037147  | 2.63132309  | 0.85843653  |
| C | -0.86687638 | -4.02513737 | -1.03048167 | C | -5.37860180 | -2.63294318 | 0.86057308  |
| C | -3.10228464 | -5.55767003 | -1.79526957 | C | -2.63114589 | 5.38037274  | -0.85718644 |
| C | 1.41934057  | -3.09545698 | -0.33036695 | N | -3.30294745 | 6.53422961  | -1.05720030 |
| C | -2.19599456 | -3.55909000 | -0.77019600 | H | -2.74179966 | 7.37763384  | -1.04279534 |
| C | -3.29330299 | -4.31595589 | -1.14828320 | H | -3.97059931 | 6.52883284  | -1.81956862 |
| C | -1.76779688 | -6.02364913 | -2.06243187 | N | 6.53421368  | 3.30297677  | 1.05919928  |
| C | 2.05615677  | -4.33957743 | -0.60599180 | H | 6.52846295  | 3.97041496  | 1.82177047  |
| C | -0.66114981 | -5.23707122 | -1.66930402 | H | 7.37752028  | 2.74163248  | 1.04516151  |
| C | 0.03238251  | -2.98291135 | -0.55377430 | N | 3.29942727  | -6.53652581 | -1.05640431 |
| C | -1.60138888 | -7.27128059 | -2.72994799 | H | 2.73732002  | -7.37928985 | -1.03976695 |
| C | -4.20398357 | -6.36360407 | -2.20422281 | H | 3.96498661  | -6.53256698 | -1.82062542 |
| C | -4.00492286 | -7.56424830 | -2.84291205 | N | -6.53160002 | -3.30575991 | 1.06229468  |
| C | -2.68737182 | -8.02341196 | -3.10969605 | H | -6.52424234 | -3.97395938 | 1.82417442  |
| N | 1.90278512  | -0.72657647 | 0.15280931  | H | -7.37542939 | -2.74517740 | 1.04990381  |
| C | 2.23252739  | -2.05912285 | 0.18665400  | C | 3.56005950  | -2.19593407 | 0.76989739  |
| C | 4.02577722  | -0.86675344 | 1.03052975  | C | 4.31799747  | -3.29297614 | 1.14668941  |
| C | 5.56010340  | -3.10164234 | 1.79284285  | C | 6.02554422  | -1.76711446 | 2.06057400  |
| C | 3.09546956  | 1.41946861  | 0.33188566  |   |             |             |             |

**Table S23.** Coordinates of the optimized structure for **Pt-THP** (meso-substituents are H) at the B3LYP/6-31G(d,p) (for C, N, H) + SDD (for Pt) level of theory.

| E(B3LYP) = -1107.862808             |             |             |             |      |             |             |             |
|-------------------------------------|-------------|-------------|-------------|------|-------------|-------------|-------------|
| Charge = 0, Multiplicity = 1        |             |             |             |      |             |             |             |
| Number of Imaginary Frequencies = 0 |             |             |             |      |             |             |             |
| Atom                                | x           | y           | z           | Atom | x           | y           | z           |
| C                                   | -2.91425876 | 0.95173279  | 0.00013353  | C    | 2.29406790  | 2.55318590  | 0.00014036  |
| C                                   | -4.26922776 | 0.45319596  | 0.00025273  | C    | 0.95173521  | 2.91425421  | 0.00035016  |
| C                                   | -4.19658943 | -0.90584931 | 0.00023799  | C    | 0.45319666  | 4.26922521  | 0.00015369  |
| C                                   | -2.79622036 | -1.25702504 | 0.00011467  | C    | -0.90584837 | 4.19658766  | -0.00031112 |
| N                                   | -2.03918289 | -0.10902675 | -0.00049691 | C    | -1.25702710 | 2.79621668  | -0.00042933 |
| C                                   | -2.55318822 | 2.29406666  | -0.00021267 | N    | -0.10902668 | 2.03917674  | -0.00000632 |
| C                                   | -2.29406733 | -2.55318635 | -0.00024544 | Pt   | -0.00000007 | 0.00000008  | 0.00008478  |
| C                                   | -0.95173454 | -2.91425393 | -0.00044732 | H    | -5.15197510 | 1.07874149  | 0.00033827  |
| C                                   | -0.45319585 | -4.26922482 | -0.00032064 | H    | -5.00760559 | -1.62196545 | 0.00031313  |
| C                                   | 0.90584882  | -4.19658694 | 0.00016813  | H    | -1.07873804 | -5.15197427 | -0.00070795 |
| C                                   | 1.25702726  | -2.79621620 | 0.00036782  | H    | 1.62196133  | -5.00760606 | 0.00051279  |
| N                                   | 0.10902701  | -2.03917663 | -0.00000761 | H    | 5.15197391  | -1.07874244 | -0.00044652 |
| C                                   | 2.55318771  | -2.29406638 | 0.00016593  | H    | 5.00760574  | 1.62196406  | -0.00047030 |
| C                                   | 2.91425796  | -0.95173282 | -0.00017036 | H    | 1.07873907  | 5.15197459  | 0.00047432  |
| C                                   | 4.26922691  | -0.45319679 | -0.00033808 | H    | -1.62196094 | 5.00760695  | -0.00069690 |
| C                                   | 4.19658923  | 0.90584835  | -0.00034677 | H    | -3.36064498 | 3.01951018  | -0.00044765 |
| C                                   | 2.79622057  | 1.25702456  | -0.00018713 | H    | -3.01951239 | -3.36064148 | -0.00050842 |
| N                                   | 2.03918285  | 0.10902636  | 0.00049263  | H    | 3.36064447  | -3.01950944 | 0.00036398  |
|                                     |             |             |             | H    | 3.01951306  | 3.36064102  | 0.00033315  |

**Table S24.** Coordinates of the optimized structure for **Pt-THTBP** (meso-substituents are H) at the B3LYP/6-31G(d,p) (for C, N, H) + SDD (for Pt) level of theory.

| E(B3LYP) = -1722.466631             |             |            |             |      |             |             |             |
|-------------------------------------|-------------|------------|-------------|------|-------------|-------------|-------------|
| Charge = 0, Multiplicity = 1        |             |            |             |      |             |             |             |
| Number of Imaginary Frequencies = 0 |             |            |             |      |             |             |             |
| Atom                                | x           | y          | z           | Atom | x           | y           | z           |
| C                                   | -2.81479140 | 1.23851640 | -0.00001180 | C    | 3.43529111  | -0.00135528 | -0.00007749 |
| C                                   | -3.50747319 | 2.51435382 | 0.00006283  | C    | 2.81479252  | -1.23851572 | 0.00000222  |
| C                                   | -2.51194646 | 3.50935322 | 0.00017155  | C    | 3.50747086  | -2.51435901 | 0.00011017  |
| C                                   | -1.23628403 | 2.81588752 | 0.00006359  | C    | 2.51194168  | -3.50935330 | 0.00017098  |
| N                                   | -1.45552756 | 1.45686593 | 0.00004915  | C    | 1.23628106  | -2.81588142 | 0.00007069  |
| C                                   | -3.43529610 | 0.00135844 | -0.00008085 | N    | 1.45553358  | -1.45685974 | 0.00006584  |
| C                                   | 0.00135540  | 3.43530419 | 0.00007574  | C    | -0.00135713 | -3.43529206 | 0.00007352  |
| C                                   | 1.23851418  | 2.81479984 | 0.00000701  | C    | -1.23851559 | -2.81478974 | 0.00000926  |
| C                                   | 2.51435533  | 3.50747444 | -0.00007086 | C    | -2.51435427 | -3.50747237 | -0.00006521 |
| C                                   | 3.50935082  | 2.51194374 | -0.00017577 | C    | -3.50935298 | -2.51194468 | -0.00017086 |
| C                                   | 2.81587803  | 1.23628451 | -0.00006913 | C    | -2.81588499 | -1.23628191 | -0.00006776 |
| N                                   | 1.45685628  | 1.45553629 | -0.00004617 | N    | -1.45686483 | -1.45552797 | -0.00004132 |



|   |             |             |             |    |             |             |             |
|---|-------------|-------------|-------------|----|-------------|-------------|-------------|
| H | -5.64103418 | 2.09862095  | -0.00037853 | C  | -4.86476746 | 2.85850349  | -0.00039565 |
| H | -6.24776167 | 4.50069413  | -0.00112865 | C  | -5.20196137 | 4.20787054  | -0.00075470 |
| H | -4.49825365 | 6.24968983  | -0.00105820 | C  | -4.20562069 | 5.20382023  | -0.00069058 |
| H | -2.09647166 | 5.64300436  | -0.00019402 | C  | -2.85617113 | 4.86662365  | -0.00023286 |
| H | 2.09863050  | 5.64103741  | 0.00036830  | C  | 2.85850976  | 4.86476732  | 0.00038070  |
| H | 4.50070487  | 6.24775559  | 0.00110441  | C  | 4.20787805  | 5.20195618  | 0.00073487  |
| H | 6.24969449  | 4.49824186  | 0.00104114  | C  | 5.20382410  | 4.20561199  | 0.00067491  |
| H | 5.64299965  | 2.09646081  | 0.00019422  | C  | 4.86662225  | 2.85616359  | 0.00022560  |
| H | 6.24776987  | -4.50068574 | -0.00117829 | C  | 4.86477559  | -2.85849916 | -0.00033763 |
| H | 4.49826657  | -6.24967438 | -0.00114109 | C  | 5.20196804  | -4.20786050 | -0.00076031 |
| H | 2.09649174  | -5.64301733 | -0.00021858 | C  | 4.20563055  | -5.20380558 | -0.00074191 |
| H | -2.09862253 | -5.64103249 | 0.00038003  | C  | 2.85617458  | -4.86662064 | -0.00026637 |
| H | -4.50069702 | -6.24775860 | 0.00111640  | C  | -2.85850476 | -4.86476532 | 0.00039074  |
| H | -6.24969105 | -4.49824913 | 0.00104672  | C  | -4.20787290 | -5.20195851 | 0.00074531  |
| H | -5.64300219 | -2.09646671 | 0.00019382  | C  | -5.20382111 | -4.20561748 | 0.00068203  |
| H | -0.00151815 | -4.51983294 | 0.00019036  | C  | -4.86662267 | -2.85616754 | 0.00022991  |
| H | -4.51983653 | 0.00152125  | -0.00020114 | Pt | -0.00000108 | -0.00000664 | 0.00000573  |
| H | 0.00151368  | 4.51984457  | 0.00020082  |    |             |             |             |
| H | 4.51983189  | -0.00150295 | -0.00020105 |    |             |             |             |
| H | 5.64099328  | -2.09855140 | -0.00024716 |    |             |             |             |

**Table S25.** Coordinates of the optimized structure for **Pt-THTNP** (meso-substituents are H) at the B3LYP/6-31G(d,p) (for C, N, H) + SDD (for Pt) level of theory.

| E(B3LYP) = -2337.032319             |             |             |             |      |             |             |             |
|-------------------------------------|-------------|-------------|-------------|------|-------------|-------------|-------------|
| Charge = 0, Multiplicity = 1        |             |             |             |      |             |             |             |
| Number of Imaginary Frequencies = 0 |             |             |             |      |             |             |             |
| Atom                                | x           | y           | z           | Atom | x           | y           | z           |
| C                                   | 2.23696413  | 2.11358761  | -0.00029447 | C    | -3.25432765 | -8.54191417 | 0.00019461  |
| C                                   | 2.46602590  | 3.54911861  | -0.00056516 | C    | -2.12036409 | -7.76568751 | 0.00009449  |
| C                                   | 1.17968030  | 4.15760585  | -0.00082058 | H    | -3.86195103 | 4.60375597  | -0.00045842 |
| C                                   | 0.21536448  | 3.06992660  | -0.00058852 | H    | -6.00824218 | 0.06484088  | 0.00093120  |
| N                                   | 0.88264881  | 1.86547932  | -0.00030511 | H    | 4.60375630  | 3.86195250  | -0.00047526 |
| C                                   | 3.23582199  | 1.15740876  | -0.00002937 | H    | 0.06483961  | 6.00824007  | -0.00140632 |
| C                                   | -1.15740794 | 3.23582569  | -0.00054201 | H    | -4.60375556 | -3.86194925 | 0.00066195  |
| C                                   | -2.11358755 | 2.23696627  | -0.00020578 | H    | -0.06484071 | -6.00824187 | -0.00004462 |
| C                                   | -3.54911983 | 2.46602632  | -0.00006798 | H    | 3.86195239  | -4.60375653 | 0.00032405  |
| C                                   | -4.15760589 | 1.17967957  | 0.00032077  | H    | 6.00824007  | -0.06483911 | 0.00050723  |
| C                                   | -3.06992309 | 0.21536558  | 0.00029876  | H    | -6.09977757 | 5.63983560  | -0.00023040 |
| N                                   | -1.86547790 | 0.88265564  | 0.00000370  | H    | -8.55918567 | 5.42665501  | 0.00035556  |
| C                                   | -3.23582273 | -1.15740594 | 0.00044941  | H    | -9.62497394 | 3.17321737  | 0.00107771  |
| C                                   | -2.23696559 | -2.11358785 | 0.00033267  | H    | -8.22891302 | 1.13689392  | 0.00119937  |
| C                                   | -2.46602581 | -3.54911863 | 0.00038971  | H    | 5.63983443  | 6.09977868  | -0.00099111 |
| C                                   | -1.17967891 | -4.15760524 | 0.00019491  | H    | 5.42665273  | 8.55918673  | -0.00170984 |
| C                                   | -0.21536555 | -3.06992395 | 0.00012657  | H    | 3.17321478  | 9.62497426  | -0.00220550 |

|   |             |             |             |    |             |             |             |
|---|-------------|-------------|-------------|----|-------------|-------------|-------------|
| N | -0.88265415 | -1.86547643 | 0.00018216  | H  | 1.13689179  | 8.22891265  | -0.00196503 |
| C | 1.15740611  | -3.23582045 | 0.00011835  | H  | 6.09977926  | -5.63983438 | 0.00062033  |
| C | 2.11358674  | -2.23696321 | 0.00016165  | H  | 8.55918731  | -5.42665247 | 0.00095234  |
| C | 3.54911826  | -2.46602649 | 0.00025055  | H  | 9.62497479  | -3.17321453 | 0.00106299  |
| C | 4.15760597  | -1.17967947 | 0.00029981  | H  | 8.22891292  | -1.13689160 | 0.00083297  |
| C | 3.06992477  | -0.21536456 | 0.00013911  | H  | -5.63983602 | -6.09977625 | 0.00068133  |
| N | 1.86548020  | -0.88264970 | 0.00008114  | H  | -5.42665596 | -8.55918456 | 0.00048819  |
| C | -4.31480088 | 3.61567896  | -0.00016238 | H  | -3.17321875 | -9.62497341 | 0.00011284  |
| C | -5.72593835 | 3.50690249  | 0.00015274  | H  | -1.13689480 | -8.22891318 | -0.00005638 |
| C | -6.34337511 | 2.20156124  | 0.00056808  | Pt | 0.00000157  | -0.00000388 | -0.00001915 |
| C | -5.53203642 | 1.04191775  | 0.00064331  | H  | 4.25680919  | 1.52288209  | 0.00000486  |
| C | 3.61567851  | 4.31480130  | -0.00067602 | H  | -1.52287990 | 4.25681296  | -0.00073911 |
| C | 3.50690105  | 5.72593861  | -0.00107160 | H  | 1.52287848  | -4.25680842 | 0.00012528  |
| C | 2.20155954  | 6.34337532  | -0.00135374 | H  | -4.25681128 | -1.52287542 | 0.00063328  |
| C | 1.04191697  | 5.53203605  | -0.00121944 | C  | -8.54191470 | 3.25432647  | 0.00082368  |
| C | -3.61567869 | -4.31479972 | 0.00050755  | C  | -7.76568767 | 2.12036329  | 0.00089725  |
| C | -3.50690279 | -5.72593776 | 0.00041263  | C  | 4.65765986  | 6.56575460  | -0.00121685 |
| C | -2.20156165 | -6.34337495 | 0.00019809  | C  | 4.53798751  | 7.93476218  | -0.00161251 |
| C | -1.04191774 | -5.53203611 | 0.00009209  | C  | 3.25432406  | 8.54191507  | -0.00189151 |
| C | 4.31480109  | -3.61567842 | 0.00036162  | C  | 2.12036125  | 7.76568772  | -0.00176436 |
| C | 5.72593935  | -3.50690103 | 0.00054171  | C  | 6.56575508  | -4.65765969 | 0.00067811  |
| C | 6.34337580  | -2.20155972 | 0.00060535  | C  | 7.93476302  | -4.53798719 | 0.00085809  |
| C | 5.53203579  | -1.04191656 | 0.00048132  | C  | 8.54191565  | -3.25432413 | 0.00091886  |
| C | -6.56575375 | 4.65766135  | 0.00009197  | C  | 7.76568804  | -2.12036116 | 0.00079630  |
| C | -7.93476149 | 4.53798963  | 0.00041431  | C  | -4.65766183 | -6.56575275 | 0.00050791  |
|   |             |             |             | C  | -4.53799038 | -7.93476070 | 0.00040515  |

**Table S26.** Coordinates of the optimized structure for **Pt-THTAP** (meso-substituents are H) at the B3LYP/6-31G(d,p) (for C, N, H) + SDD (for Pt) level of theory.

| E(B3LYP) = -2951.579844             |             |             |             |      |             |              |             |
|-------------------------------------|-------------|-------------|-------------|------|-------------|--------------|-------------|
| Charge = 0, Multiplicity = 1        |             |             |             |      |             |              |             |
| Number of Imaginary Frequencies = 0 |             |             |             |      |             |              |             |
| Atom                                | x           | y           | z           | Atom | x           | y            | z           |
| C                                   | -2.96544935 | -0.82761543 | -0.00000299 | C    | 2.18614461  | 7.73244025   | -0.00024865 |
| C                                   | -4.31505143 | -0.28641313 | 0.00004083  | C    | -0.36484490 | 10.47868073  | -0.00015435 |
| C                                   | -4.17232734 | 1.13728394  | 0.00010630  | C    | 0.44371552  | 11.58358367  | -0.00022773 |
| C                                   | -2.74214826 | 1.39981488  | 0.00008028  | C    | 1.86448061  | 11.44115625  | -0.00031178 |
| N                                   | -2.05565300 | 0.20608475  | 0.00002058  | C    | 2.43763114  | 10.19774137  | -0.00031990 |
| C                                   | -2.66080436 | -2.17591264 | -0.00005127 | C    | 0.36484796  | -10.47867951 | -0.00006013 |
| C                                   | -2.17591366 | 2.66080473  | 0.00008497  | C    | -0.44371192 | -11.58358288 | -0.00011095 |
| C                                   | -0.82761677 | 2.96545040  | 0.00002215  | C    | -1.86447705 | -11.44115619 | -0.00017600 |
| C                                   | -0.28641346 | 4.31505176  | -0.00002390 | C    | -2.43762819 | -10.19774153 | -0.00018820 |
| C                                   | 1.13728357  | 4.17232711  | -0.00010610 | C    | 10.47867994 | 0.36484492   | 0.00002253  |
| C                                   | 1.39981337  | 2.74214749  | -0.00008703 | C    | 11.58358288 | -0.44371551  | 0.00007839  |

|   |             |             |             |    |              |              |             |
|---|-------------|-------------|-------------|----|--------------|--------------|-------------|
| N | 0.20608360  | 2.05565313  | -0.00001494 | C  | 11.44115551  | -1.86448056  | 0.00015949  |
| C | 2.66080368  | 2.17591349  | -0.00010859 | C  | 10.19774058  | -2.43763109  | 0.00018226  |
| C | 2.96544922  | 0.82761692  | -0.00005363 | C  | -10.47868031 | -0.36484793  | 0.00018884  |
| C | 4.31505101  | 0.28641349  | -0.00002647 | C  | -11.58358367 | 0.44371194   | 0.00025602  |
| C | 4.17232636  | -1.13728346 | 0.00005282  | C  | -11.44115699 | 1.86447709   | 0.00032351  |
| C | 2.74214629  | -1.39981330 | 0.00005126  | C  | -10.19774238 | 2.43762825   | 0.00032173  |
| N | 2.05565191  | -0.20608348 | -0.00000805 | H  | 5.67713693   | 1.95749144   | -0.00010523 |
| C | 2.17591248  | -2.66080330 | 0.00007583  | H  | 5.17559558   | -3.04548325  | 0.00017623  |
| C | 0.82761559  | -2.96544814 | 0.00003620  | H  | -1.95749131  | 5.67713788   | 0.00004221  |
| C | 0.28641317  | -4.31505067 | 0.00001079  | H  | 3.04548330   | 5.17559658   | -0.00024953 |
| C | -1.13728385 | -4.17232658 | -0.00005223 | H  | 1.95749199   | -5.67713534  | 0.00006646  |
| C | -1.39981481 | -2.74214703 | -0.00004291 | H  | -3.04548301  | -5.17559717  | -0.00015826 |
| N | -0.20608463 | -2.05565179 | 0.00000593  | H  | 1.68997494   | -8.12209352  | 0.00003086  |
| C | 5.55651368  | 0.87739724  | -0.00004586 | H  | -3.26861131  | -7.62501103  | -0.00019619 |
| C | 6.72055307  | 0.05696695  | 0.00000588  | H  | 8.12209463   | 1.68997308   | -0.00007490 |
| C | 6.57550808  | -1.38989809 | 0.00008885  | H  | 7.62500960   | -3.26861294  | 0.00020823  |
| C | 5.27177370  | -1.96293854 | 0.00011502  | H  | -5.67713635  | -1.95749185  | -0.00000273 |
| C | -0.87739714 | 5.55651458  | -0.00001894 | H  | -5.17559819  | 3.04548306   | 0.00023068  |
| C | -0.05696694 | 6.72055376  | -0.00008869 | H  | -8.12209436  | -1.68997489  | 0.00006418  |
| C | 1.38989819  | 6.57550876  | -0.00017467 | H  | -7.62501193  | 3.26861138   | 0.00029977  |
| C | 1.96293860  | 5.27177465  | -0.00018571 | H  | -1.68997302  | 8.12209547   | -0.00002103 |
| C | 0.87739770  | -5.55651288 | 0.00001946  | H  | 3.26861300   | 7.62501050   | -0.00031442 |
| C | 0.05696811  | -6.72055281 | -0.00002714 | H  | -1.44664463  | 10.58504250  | -0.00009120 |
| C | -1.38989700 | -6.57550850 | -0.00009373 | H  | 0.00808658   | 12.57852088  | -0.00022334 |
| C | -1.96293824 | -5.27177453 | -0.00010919 | H  | 2.48893459   | 12.32982355  | -0.00036946 |
| C | 0.60772182  | -8.01251673 | -0.00001677 | H  | 3.51901712   | 10.08725181  | -0.00038408 |
| C | -0.19098966 | -9.15974104 | -0.00006872 | H  | 1.44664776   | -10.58504070 | -0.00001146 |
| C | -1.63104647 | -9.01538027 | -0.00013485 | H  | -0.00808252  | -12.57851987 | -0.00010297 |
| C | -2.18614287 | -7.73244031 | -0.00014491 | H  | -2.48893056  | -12.32982376 | -0.00021593 |
| C | 8.01251726  | 0.60772002  | -0.00001499 | H  | -3.51901422  | -10.08725245 | -0.00023795 |
| C | 9.15974120  | -0.19099204 | 0.00004178  | H  | 10.58504170  | 1.44664466   | -0.00003835 |
| C | 9.01537969  | -1.63104878 | 0.00012418  | H  | 12.57852014  | -0.00808660  | 0.00006220  |
| C | 7.73243946  | -2.18614454 | 0.00014475  | H  | 12.32982276  | -2.48893452  | 0.00020316  |
| C | -5.55651384 | -0.87739760 | 0.00004595  | H  | 10.08725096  | -3.51901706  | 0.00024422  |
| C | -6.72055355 | -0.05696810 | 0.00010953  | H  | -10.58504155 | -1.44664772  | 0.00013829  |
| C | -6.57550919 | 1.38989710  | 0.00017860  | H  | -12.57852067 | 0.00808250   | 0.00025928  |
| C | -5.27177547 | 1.96293829  | 0.00017945  | H  | -12.32982456 | 2.48893063   | 0.00037648  |
| C | -8.01251752 | -0.60772178 | 0.00011369  | H  | -10.08725329 | 3.51901427   | 0.00037329  |
| C | -9.15974184 | 0.19098967  | 0.00018249  | Pt | -0.00000025  | 0.00000032   | 0.00000148  |
| C | -9.01538101 | 1.63104655  | 0.00025109  | H  | 2.86235621   | -3.50021676  | 0.00011439  |
| C | -7.73244115 | 2.18614295  | 0.00024666  | H  | -3.50021819  | -2.86235596  | -0.00008280 |
| C | -0.60771997 | 8.01251811  | -0.00008313 | H  | 3.50021677   | 2.86235771   | -0.00015835 |
| C | 0.19099205  | 9.15974194  | -0.00015789 | H  | -2.86235744  | 3.50021823   | 0.00012644  |
| C | 1.63104886  | 9.01538049  | -0.00024327 |    |              |              |             |

**Table S27.** Coordinates of the optimized structure for **Pt-P-2alkynyl** (meso-substituents are bialkynyl groups) at the B3LYP/6-31G(d,p) (for C, N, Si, H) + SDD (for Pt) level of theory.

| E(B3LYP) = -3351.888697             |             |             |             |      |             |             |             |
|-------------------------------------|-------------|-------------|-------------|------|-------------|-------------|-------------|
| Charge = 0, Multiplicity = 1        |             |             |             |      |             |             |             |
| Number of Imaginary Frequencies = 0 |             |             |             |      |             |             |             |
| Atom                                | x           | y           | z           | Atom | x           | y           | z           |
| C                                   | -2.87531668 | 1.10564892  | -0.00006300 | C    | 7.27411492  | 8.48243825  | 1.55165233  |
| C                                   | -4.25116702 | 0.68331922  | -0.00006168 | H    | 6.29766250  | 8.97668678  | 1.57532124  |
| C                                   | -4.25015124 | -0.67665700 | 0.00001385  | H    | 7.36653810  | 7.87925312  | 2.46041029  |
| C                                   | -2.87371165 | -1.09691487 | 0.00004859  | H    | 8.04513659  | 9.26077178  | 1.58512726  |
| N                                   | -2.05226553 | 0.00497497  | 0.00000249  | C    | 9.14566429  | 6.55169404  | 0.00051599  |
| C                                   | -2.45365795 | 2.45020373  | -0.00009433 | H    | 9.26425313  | 5.91802196  | 0.88521007  |
| C                                   | -2.45017658 | -2.44077841 | 0.00010314  | H    | 9.26431912  | 5.91810472  | -0.88422973 |
| C                                   | -1.10563661 | -2.86244837 | 0.00006598  | H    | 9.96104007  | 7.28414939  | 0.00057878  |
| C                                   | -0.68332687 | -4.23829104 | 0.00006036  | C    | 7.27425853  | -8.46752550 | -1.55168131 |
| C                                   | 0.67665200  | -4.23727511 | -0.00001804 | H    | 6.29704776  | -8.96027287 | -1.57540298 |
| C                                   | 1.09688979  | -2.86084294 | -0.00005365 | H    | 7.36764848  | -7.86446818 | -2.46042332 |
| N                                   | -0.00498152 | -2.03937655 | -0.00000264 | H    | 8.04408152  | -9.24704577 | -1.58513162 |
| C                                   | 2.44073793  | -2.43729508 | -0.00011392 | C    | 9.14874596  | -6.53982804 | -0.00030132 |
| C                                   | 2.86235868  | -1.09276523 | -0.00009024 | H    | 9.26842061  | -5.90630513 | -0.88495732 |
| C                                   | 4.23818532  | -0.67048689 | -0.00010331 | H    | 9.26835759  | -5.90648034 | 0.88448669  |
| C                                   | 4.23720531  | 0.68947330  | -0.00003069 | H    | 9.96293617  | -7.27360003 | -0.00034849 |
| C                                   | 2.86075957  | 1.10978592  | 0.00001944  | C    | 7.27411746  | -8.46783068 | 1.55054918  |
| N                                   | 2.03930428  | 0.00791903  | -0.00001849 | H    | 7.36741897  | -7.86494348 | 2.45941301  |
| C                                   | 2.43720236  | 2.45373750  | 0.00008349  | H    | 6.29690054  | -8.96057640 | 1.57408111  |
| C                                   | 1.09275229  | 2.87538580  | 0.00006053  | H    | 8.04393049  | -9.24736322 | 1.58392939  |
| C                                   | 0.67049748  | 4.25122132  | 0.00006278  | C    | -9.16161454 | 6.55284670  | -0.00050801 |
| C                                   | -0.68949614 | 4.25024167  | -0.00000957 | H    | -9.28122146 | 5.91938877  | -0.88522078 |
| C                                   | -1.10978524 | 2.87378711  | -0.00004474 | H    | -9.28132227 | 5.91944264  | 0.88422579  |
| N                                   | -0.00792511 | 2.05232412  | -0.00000321 | H    | -9.97578676 | 7.28663858  | -0.00058409 |
| H                                   | -5.09637502 | 1.35540600  | -0.00010841 | C    | -7.28704383 | 8.48067709  | 1.55064208  |
| H                                   | -5.09433120 | -1.35006317 | 0.00004192  | H    | -7.38041223 | 7.87771946  | 2.45945121  |
| H                                   | -1.35542170 | -5.08349226 | 0.00010807  | H    | -6.30981665 | 8.97339969  | 1.57427215  |
| H                                   | 1.35006627  | -5.08144819 | -0.00004861 | H    | -8.05683892 | 9.26022683  | 1.58403868  |
| H                                   | 5.08338568  | -1.34258272 | -0.00015750 | C    | -8.48050876 | -7.27438104 | -1.55067947 |
| H                                   | 5.08145242  | 1.36275736  | -0.00001375 | H    | -8.97323459 | -6.29715968 | -1.57442027 |
| H                                   | 1.34271364  | 5.09635506  | 0.00010941  | H    | -7.87752102 | -7.36783639 | -2.45946113 |
| H                                   | -1.36290107 | 5.09442212  | -0.00003438 | H    | -9.26005077 | -8.04418640 | -1.58402888 |
| C                                   | 3.44585501  | -3.44016557 | -0.00019260 | C    | -8.48057665 | -7.27411910 | 1.55155100  |
| C                                   | -3.45305995 | -3.44587880 | 0.00018352  | H    | -7.87762416 | -7.36736695 | 2.46037702  |
| C                                   | 3.44111406  | 3.45780829  | 0.00016075  | H    | -8.97334603 | -6.29691425 | 1.57507586  |
| C                                   | -3.45877121 | 3.45306965  | -0.00016951 | H    | -9.26008723 | -8.04395108 | 1.58501992  |
| Pt                                  | -0.00647095 | 0.00646400  | -0.00000878 | C    | -6.55268667 | -9.14879840 | 0.00063284  |

|    |             |             |             |    |             |             |             |
|----|-------------|-------------|-------------|----|-------------|-------------|-------------|
| C  | -4.31441175 | -4.31312365 | 0.00025280  | H  | -5.91921864 | -9.26850401 | -0.88405755 |
| C  | -4.32600945 | 4.31442898  | -0.00024459 | H  | -5.91928654 | -9.26837584 | 0.88538898  |
| C  | 4.30830084  | 4.31921793  | 0.00022818  | H  | -7.28645792 | -9.96298935 | 0.00066355  |
| C  | 4.31309050  | -4.30152570 | -0.00026293 | C  | 7.27425594  | 8.48257334  | -1.55060642 |
| C  | -5.29291271 | 5.27131910  | -0.00032093 | H  | 7.36678639  | 7.87946956  | -2.45940798 |
| C  | -6.16619524 | 6.13272833  | -0.00038053 | H  | 6.29779961  | 8.97680971  | -1.57433679 |
| C  | 5.27562216  | 5.27568600  | 0.00030110  | H  | 8.04527111  | 9.26092005  | -1.58393092 |
| C  | 6.14968311  | 6.13630578  | 0.00037420  | Si | -7.42191200 | -7.47260427 | 0.00047578  |
| C  | 5.27999915  | -5.25841082 | -0.00033459 | Si | 7.47255046  | -7.40904797 | -0.00045415 |
| C  | 6.15331004  | -6.11979047 | -0.00037263 | C  | -7.28697196 | 8.48063174  | -1.55158305 |
| C  | -5.27129321 | -5.28003502 | 0.00032961  | H  | -6.30973494 | 8.97333084  | -1.57521209 |
| C  | -6.13265673 | -6.15336227 | 0.00039075  | H  | -7.38034947 | 7.87766702  | -2.46038785 |
| Si | -7.48539629 | 7.42202530  | -0.00046167 | H  | -8.05675336 | 9.26019460  | -1.58499447 |
| Si | 7.47085291  | 7.42359188  | 0.00048558  |    |             |             |             |

**Table S28.** Coordinates of the optimized structure for **Zn-TNP-O<sub>2</sub>** at the B3LYP/6-31G(d,p) (for C, N, Si, O, H) + SDD (for Zn) level of theory.

|                                     |             |             |             |      |             |             |             |
|-------------------------------------|-------------|-------------|-------------|------|-------------|-------------|-------------|
| E(B3LYP) = -4534.551665             |             |             |             |      |             |             |             |
| Charge = 0, Multiplicity = 1        |             |             |             |      |             |             |             |
| Number of Imaginary Frequencies = 0 |             |             |             |      |             |             |             |
| Atom                                | x           | y           | z           | Atom | x           | y           | z           |
| C                                   | -2.94500246 | -1.23565869 | 0.76401952  | H    | 7.58651814  | 1.99090226  | -1.05037693 |
| C                                   | -3.57976145 | -2.48501938 | 1.18747640  | H    | 8.68837673  | 4.20409937  | -1.09289013 |
| C                                   | -2.56679278 | -3.21632658 | 1.90214865  | H    | 7.33899258  | 6.28044202  | -0.82309836 |
| C                                   | -1.39745186 | -2.38875762 | 1.88164301  | H    | 4.89142245  | 6.14427894  | -0.51395710 |
| N                                   | -1.63974558 | -1.24946936 | 1.20378498  | H    | -0.31180852 | -5.49132026 | -2.69556491 |
| C                                   | -3.52090135 | -0.12231224 | 0.07359896  | H    | 4.29301803  | -3.70051386 | -1.82552459 |
| C                                   | -0.13050639 | -2.66305913 | 2.55546257  | H    | 0.71878780  | -7.58315173 | -3.62856685 |
| C                                   | -0.11288347 | -2.88422278 | -1.50444013 | H    | 2.72676711  | -8.89609462 | -4.23206165 |
| C                                   | 0.88356002  | -3.89843935 | -1.92452144 | H    | 4.99987131  | -7.97418636 | -3.80521749 |
| C                                   | 2.17428787  | -3.36145182 | -1.65713659 | H    | 5.26580549  | -5.74489443 | -2.77307675 |
| C                                   | 1.94240884  | -2.01336692 | -1.06709982 | H    | -5.62623707 | -2.53390044 | 0.51180914  |
| N                                   | 0.60917718  | -1.79560649 | -0.97661399 | H    | -2.01845060 | -4.98002297 | 2.99294845  |
| C                                   | 2.92809086  | -1.05588643 | -0.71126647 | H    | -7.16414040 | -4.39300006 | 0.91280483  |
| C                                   | 2.63466158  | 0.33556423  | -0.50783158 | H    | -7.64176250 | -6.60847778 | 1.88770863  |
| C                                   | 3.58278069  | 1.45592041  | -0.53986606 | H    | -5.87264443 | -7.84053592 | 3.14025707  |
| C                                   | 2.79891841  | 2.65258124  | -0.40038948 | H    | -3.62382686 | -6.84916188 | 3.41173287  |
| C                                   | 1.40111664  | 2.21558039  | -0.31071119 | H    | -1.67067610 | 5.27146639  | -1.28248601 |
| N                                   | 1.38746217  | 0.83161802  | -0.34234581 | H    | -5.54697250 | 2.12657517  | -0.94966713 |
| C                                   | 0.23694120  | 3.00177593  | -0.30173077 | H    | -3.19009596 | 7.04475907  | -2.06745890 |
| C                                   | -1.12551494 | 2.51513051  | -0.41927624 | H    | -5.47117728 | 7.81674576  | -2.62168125 |
| C                                   | -2.31369148 | 3.28044557  | -0.77532862 | H    | -7.40649845 | 6.25927593  | -2.41325533 |
| C                                   | -3.42221216 | 2.36268683  | -0.70150935 | H    | -7.05846344 | 3.93388574  | -1.66194149 |

|    |             |             |             |    |             |             |             |
|----|-------------|-------------|-------------|----|-------------|-------------|-------------|
| C  | -2.85881412 | 1.08361182  | -0.28393729 | H  | 8.22149057  | -3.28409458 | 2.09266773  |
| N  | -1.49340693 | 1.23774131  | -0.18537305 | H  | 7.00503950  | -2.04715566 | 2.45281260  |
| C  | 4.95006887  | 1.52326192  | -0.72303138 | H  | 6.50014540  | -3.70357127 | 2.09579736  |
| C  | 5.59577773  | 2.78570207  | -0.74994933 | H  | 8.46778337  | -4.41451291 | -0.85226412 |
| C  | 4.81660572  | 3.98243319  | -0.59708851 | H  | 7.39616679  | -3.80651398 | -2.12233147 |
| C  | 3.41033238  | 3.89127956  | -0.43058480 | H  | 6.74979223  | -4.83141351 | -0.82682479 |
| C  | 7.00174850  | 2.89887202  | -0.93006149 | H  | 8.31102334  | -0.86326239 | -1.48685523 |
| C  | 7.61363488  | 4.13178101  | -0.95442116 | H  | 8.17819779  | -0.23187139 | 0.16505483  |
| C  | 6.84548182  | 5.31314485  | -0.80094273 | H  | 9.38329869  | -1.46829016 | -0.21583177 |
| C  | 5.48168695  | 5.23909361  | -0.62746094 | H  | 2.46596202  | 9.03361768  | 0.57288371  |
| C  | 0.69163501  | -5.12239774 | -2.50226956 | H  | 3.08090408  | 7.41221859  | 0.91894414  |
| C  | 1.83154999  | -5.90214606 | -2.84904933 | H  | 2.65268171  | 7.86477637  | -0.74180699 |
| C  | 3.14301655  | -5.36909825 | -2.59724098 | H  | -0.55569703 | 9.43535963  | -0.22126133 |
| C  | 3.29631052  | -4.08340200 | -1.99800693 | H  | -1.63701068 | 8.03877609  | -0.31785536 |
| C  | 1.71259786  | -7.18490669 | -3.44243641 | H  | -0.36713754 | 8.26335871  | -1.53381622 |
| C  | 2.83266123  | -7.91510716 | -3.77833963 | H  | -0.87617217 | 7.20562626  | 2.61947424  |
| C  | 4.12415983  | -7.39124168 | -3.53530283 | H  | 0.82101825  | 6.98656111  | 3.06554584  |
| C  | 4.27407556  | -6.14806044 | -2.95907174 | H  | 0.19463324  | 8.61138117  | 2.74054418  |
| C  | -4.83977258 | -3.04605565 | 1.04679206  | H  | 2.73506936  | 3.01622270  | 4.16828345  |
| C  | -5.11132486 | -4.31992524 | 1.60085173  | H  | 2.14435834  | 2.54067674  | 2.57024960  |
| C  | -4.08779907 | -5.03641355 | 2.32248015  | H  | 1.07333027  | 2.43704683  | 3.97514288  |
| C  | -2.80911466 | -4.45957357 | 2.46444993  | H  | 5.14548568  | 0.92887286  | 3.81529776  |
| C  | -6.39309687 | -4.92757781 | 1.46235373  | H  | 4.49998313  | 0.43958265  | 2.24037090  |
| C  | -6.65794971 | -6.16266367 | 2.00374779  | H  | 4.76314689  | -0.77373414 | 3.50130876  |
| C  | -5.64962945 | -6.86534015 | 2.71707917  | H  | 2.92854639  | -0.85741813 | 6.04141387  |
| C  | -4.40010785 | -6.31561648 | 2.86942016  | H  | 1.60903182  | 0.30701655  | 6.22038029  |
| C  | -2.50351077 | 4.58646473  | -1.19666198 | H  | 3.28903324  | 0.84477506  | 6.37807279  |
| C  | -3.80017842 | 5.03706194  | -1.52900329 | H  | -9.60409875 | 1.08328190  | -1.82784396 |
| C  | -4.91550388 | 4.13423510  | -1.41753452 | H  | -8.47875792 | 1.92519997  | -0.75431048 |
| C  | -4.70224272 | 2.79831063  | -1.00534741 | H  | -8.00127923 | 1.54291487  | -2.41928380 |
| C  | -4.03711463 | 6.37002950  | -1.97451828 | H  | -9.06459704 | -1.92162798 | -2.63465636 |
| C  | -5.30577394 | 6.79767187  | -2.28421193 | H  | -7.60997837 | -2.74197150 | -2.04450387 |
| C  | -6.40809947 | 5.90954639  | -2.16658144 | H  | -7.46856194 | -1.44967763 | -3.24149230 |
| C  | -6.21611491 | 4.61487416  | -1.74686404 | H  | -8.73395259 | -0.32646048 | 1.37672054  |
| C  | 4.27623732  | -1.49374299 | -0.57389017 | H  | -9.87429840 | -1.20761312 | 0.34784344  |
| C  | 0.38232431  | 4.40613747  | -0.10336738 | H  | -8.42026537 | -2.01341573 | 0.95625457  |
| C  | 0.77768597  | -1.54212818 | 2.77648008  | C  | 2.10441585  | 2.29504471  | 3.63546659  |
| C  | -4.90765693 | -0.21233578 | -0.24368183 | C  | 4.43866353  | 0.25537664  | 3.31680134  |
| C  | -6.09310491 | -0.30273280 | -0.53190582 | C  | 2.62177909  | 0.17123366  | 5.82784333  |
| C  | 1.54528381  | -0.67172575 | 3.16309657  | C  | -8.54861287 | 1.17225429  | -1.54646798 |
| C  | 5.42096858  | -1.88554488 | -0.38477819 | C  | -8.01649191 | -1.77271937 | -2.35057531 |
| C  | 0.48258844  | 5.60059382  | 0.14457818  | C  | -8.81099149 | -1.06540218 | 0.57259795  |
| Si | 7.11537587  | -2.49408680 | -0.00445971 | Zn | -0.24142102 | -0.30494681 | 0.04167179  |
| Si | 2.69349672  | 0.53621966  | 3.97540862  | O  | -1.32881060 | -2.92429128 | -1.59351812 |

|    |             |             |             |   |            |             |             |
|----|-------------|-------------|-------------|---|------------|-------------|-------------|
| Si | -7.87611886 | -0.49566321 | -0.96683312 | O | 0.14622477 | -3.77397358 | 3.01607853  |
| Si | 0.59495130  | 7.38158261  | 0.60524644  | H | 5.53948274 | 0.62615132  | -0.85461174 |
| C  | 7.22020440  | -2.92248836 | 1.83141790  | H | 2.83360615 | 4.80069084  | -0.33797560 |
| C  | 7.46120442  | -4.02985796 | -1.05209934 |   |            |             |             |
| C  | 8.36084130  | -1.13493832 | -0.42704716 |   |            |             |             |
| C  | 2.36565597  | 7.97457679  | 0.30940116  |   |            |             |             |
| C  | -0.60431553 | 8.36905191  | -0.46994917 |   |            |             |             |
| C  | 0.14121579  | 7.56183716  | 2.42893990  |   |            |             |             |

**Table S29.** Coordinates of the optimized structure for **Zn-THP** (meso-substituents are H) at the B3LYP/6-31G(d,p) (for C, N, H) + SDD (for Zn) level of theory.

| E(B3LYP) = -1215.585252             |             |             |             |      |             |             |             |
|-------------------------------------|-------------|-------------|-------------|------|-------------|-------------|-------------|
| Charge = 0, Multiplicity = 1        |             |             |             |      |             |             |             |
| Number of Imaginary Frequencies = 0 |             |             |             |      |             |             |             |
| Atom                                | x           | y           | z           | Atom | x           | y           | z           |
| C                                   | 1.80396954  | 2.49031031  | -0.00014465 | H    | -3.91524031 | 3.54329250  | 0.00016719  |
| C                                   | 3.00763834  | 0.63985226  | -0.00009067 | C    | -3.93714519 | -1.74750509 | -0.00024084 |
| N                                   | 1.72117501  | 1.11975477  | -0.00013024 | H    | -5.01528756 | -1.65215788 | -0.00035365 |
| C                                   | 0.71156983  | 3.36081737  | -0.00003515 | C    | -3.19331398 | -2.89103761 | -0.00011075 |
| C                                   | 3.36081462  | -0.71157172 | 0.00005224  | H    | -3.54329202 | -3.91523828 | -0.00012849 |
| C                                   | 2.49030643  | -1.80397017 | 0.00016710  | H    | -4.42332125 | 0.93653122  | 0.00001967  |
| C                                   | 0.63985011  | -3.00764165 | 0.00009165  | H    | -0.93653514 | -4.42331811 | -0.00003894 |
| N                                   | 1.11975018  | -1.72117796 | 0.00014525  | H    | 4.42331687  | -0.93653029 | 0.00005794  |
| C                                   | -0.71157458 | -3.36081636 | -0.00005624 | H    | 0.93652634  | 4.42331997  | -0.00005532 |
| C                                   | -1.80397162 | -2.49030614 | -0.00017469 | N    | -1.11975573 | 1.72117645  | 0.00014031  |
| C                                   | -3.00764201 | -0.63985155 | -0.00011458 | Zn   | 0.00001010  | -0.00000214 | 0.00000579  |
| N                                   | -1.72117945 | -1.11975112 | -0.00014827 | C    | 1.74750364  | -3.93714335 | 0.00026703  |
| C                                   | -3.36081915 | 0.71157269  | 0.00002527  | H    | 1.65215754  | -5.01528586 | 0.00040722  |
| C                                   | -2.49031007 | 1.80397100  | 0.00014724  | C    | 2.89103650  | -3.19331191 | 0.00007770  |
| C                                   | -0.63985370 | 3.00763867  | 0.00010155  | H    | 3.91523684  | -3.54329104 | 0.00007835  |
| H                                   | 3.54329139  | 3.91523893  | -0.00025354 | C    | 3.93714133  | 1.74750517  | -0.00012765 |
| C                                   | -1.74750657 | 3.93714315  | 0.00017636  | H    | 5.01528381  | 1.65215783  | -0.00017254 |
| H                                   | -1.65215822 | 5.01528550  | 0.00025454  | C    | 3.19331138  | 2.89103897  | -0.00016960 |
| C                                   | -2.89104008 | 3.19331343  | 0.00012442  |      |             |             |             |

**Table S30.** Coordinates of the optimized structure for **Zn-THTBP** (meso-substituents are H) at the B3LYP/6-31G(d,p) (for C, N, H) + SDD (for Zn) level of theory.

| E(B3LYP) = -1830.188252             |             |             |             |      |             |             |             |
|-------------------------------------|-------------|-------------|-------------|------|-------------|-------------|-------------|
| Charge = 0, Multiplicity = 1        |             |             |             |      |             |             |             |
| Number of Imaginary Frequencies = 0 |             |             |             |      |             |             |             |
| Atom                                | x           | y           | z           | Atom | x           | y           | z           |
| C                                   | 2.75611906  | -1.39364894 | 0.00024087  | H    | 1.98241781  | 7.46123316  | -0.00199003 |
| C                                   | 4.18595871  | -1.12384038 | 0.00003036  | C    | 6.71052109  | 0.04287196  | -0.00018187 |
| C                                   | 4.32511084  | 0.28022632  | -0.00038126 | H    | 7.70521572  | 0.47905586  | -0.00025848 |
| C                                   | 2.97602936  | 0.82552038  | -0.00052842 | C    | 6.57154205  | -1.35945372 | 0.00024675  |
| N                                   | 2.06662481  | -0.20484353 | -0.00017746 | H    | 7.46124638  | -1.98242752 | 0.00052324  |
| C                                   | 2.18057457  | -2.66036437 | 0.00046336  | C    | 0.04286690  | -6.71054691 | 0.00009664  |
| C                                   | 2.66031509  | 2.18057859  | -0.00091878 | H    | 0.47905216  | -7.70524107 | 0.00007613  |
| C                                   | 1.39359056  | 2.75610756  | -0.00079231 | C    | -1.35945499 | -6.57156793 | -0.00005463 |
| C                                   | 1.12380030  | 4.18595312  | -0.00085698 | H    | -1.98243052 | -7.46127120 | -0.00021851 |
| C                                   | -0.28026454 | 4.32512337  | -0.00045747 | C    | -6.71055686 | -0.04288585 | 0.00120440  |
| C                                   | -0.82557542 | 2.97605132  | -0.00004074 | H    | -7.70525546 | -0.47906078 | 0.00141238  |
| N                                   | 0.20476379  | 2.06663227  | -0.00022641 | C    | -6.57156311 | 1.35943455  | 0.00134336  |
| C                                   | -2.18062798 | 2.66032095  | 0.00042493  | H    | -7.46125998 | 1.98241926  | 0.00168530  |
| C                                   | -2.75612167 | 1.39357860  | 0.00055119  | H    | -2.86861140 | 3.49977448  | 0.00060384  |
| C                                   | -4.18598204 | 1.12380146  | 0.00068461  | H    | -3.49983871 | -2.86858670 | -0.00000366 |
| C                                   | -4.32515144 | -0.28025980 | 0.00056252  | H    | 2.86851886  | -3.49984993 | 0.00065483  |
| C                                   | -2.97606172 | -0.82555955 | 0.00023781  | H    | 3.49978432  | 2.86854275  | -0.00125387 |
| N                                   | -2.06664354 | 0.20476592  | 0.00021033  | C    | -1.95383654 | -5.31434428 | -0.00002218 |
| C                                   | -2.66036932 | -2.18062260 | 0.00003172  | C    | 0.87252370  | -5.59448865 | 0.00025526  |
| C                                   | -1.39363598 | -2.75613151 | 0.00000105  | H    | 3.03599537  | 5.21901030  | -0.00175007 |
| C                                   | -1.12384134 | -4.18598612 | 0.00014221  | H    | -1.95238605 | 5.71351834  | -0.00024347 |
| C                                   | 0.28022164  | -4.32513822 | 0.00027640  | H    | 5.21902869  | -3.03602692 | 0.00070420  |
| C                                   | 0.82550555  | -2.97603954 | 0.00033235  | H    | 5.71349495  | 1.95235867  | -0.00084533 |
| N                                   | -0.20484407 | -2.06663500 | 0.00019311  | H    | -5.21903694 | 3.03599727  | 0.00121429  |
| C                                   | 1.95380369  | 5.31431025  | -0.00139785 | H    | -5.71354327 | -1.95238330 | 0.00069193  |
| C                                   | -0.87255522 | 5.59448331  | -0.00058708 | H    | -3.03602915 | -5.21905296 | -0.00016841 |
| C                                   | 5.31432232  | -1.95383479 | 0.00034478  | H    | 1.95235532  | -5.71352009 | 0.00039733  |
| C                                   | 5.59446622  | 0.87252702  | -0.00049055 | Zn   | 0.00015902  | 0.00012927  | -0.00000064 |
| C                                   | -5.31433412 | 1.95380508  | 0.00107512  | C    | -0.04288983 | 6.71053024  | -0.00111910 |
| C                                   | -5.59450601 | -0.87255243 | 0.00082240  | H    | -0.47906286 | 7.70522959  | -0.00122971 |
|                                     |             |             |             | C    | 1.35943432  | 6.57153560  | -0.00153553 |



**Table S31.** Coordinates of the optimized structure for **Zn-THTNP** (meso-substituents are H) at the B3LYP/6-31G(d,p) (for C, N, H) + SDD (for Zn) level of theory.

| E(B3LYP) = -2444.753697             |             |             |             |      |             |             |             |
|-------------------------------------|-------------|-------------|-------------|------|-------------|-------------|-------------|
| Charge = 0, Multiplicity = 1        |             |             |             |      |             |             |             |
| Number of Imaginary Frequencies = 0 |             |             |             |      |             |             |             |
| Atom                                | x           | y           | z           | Atom | x           | y           | z           |
| C                                   | -1.12500797 | 2.88019823  | -0.00019674 | C    | -4.90854325 | -6.40757585 | -0.00033405 |
| C                                   | -2.36960653 | 3.63830472  | -0.00045858 | C    | -4.33935454 | 6.80603869  | -0.00076438 |
| C                                   | -3.42086192 | 2.67385699  | -0.00056820 | C    | -5.65221554 | 7.21156516  | -0.00092804 |
| C                                   | -2.77261770 | 1.36867481  | -0.00040136 | C    | -6.69877510 | 6.25139336  | -0.00103970 |
| N                                   | -1.40843400 | 1.53540203  | -0.00017748 | C    | -6.40756426 | 4.90853644  | -0.00098534 |
| C                                   | 0.14823778  | 3.43841702  | -0.00000906 | C    | 6.80605298  | 4.33936894  | 0.00088680  |
| C                                   | -3.43838808 | 0.14820737  | -0.00043443 | C    | 7.21158072  | 5.65223115  | 0.00091741  |
| C                                   | -2.88015516 | -1.12503401 | -0.00030402 | C    | 6.25141030  | 6.69878928  | 0.00079134  |
| C                                   | -3.63827675 | -2.36962539 | -0.00027261 | C    | 4.90855206  | 6.40757733  | 0.00063791  |
| C                                   | -2.67384067 | -3.42089147 | -0.00014333 | C    | 4.33936333  | -6.80604097 | 0.00047034  |
| C                                   | -1.36865258 | -2.77266288 | -0.00006846 | C    | 5.65222189  | -7.21158045 | 0.00062967  |
| N                                   | -1.53535597 | -1.40848423 | -0.00017302 | C    | 6.69878881  | -6.25141961 | 0.00073669  |
| C                                   | -0.14817957 | -3.43841955 | 0.00005942  | C    | 6.40758886  | -4.90855872 | 0.00068146  |
| C                                   | 1.12505004  | -2.88015381 | 0.00015683  | H    | -5.73634070 | -1.85566898 | -0.00051923 |
| C                                   | 2.36964197  | -3.63829325 | 0.00021324  | H    | -2.34209418 | -5.55533652 | -0.00005064 |
| C                                   | 3.42090644  | -2.67385856 | 0.00032318  | H    | -1.85566282 | 5.73637065  | -0.00043823 |
| C                                   | 2.77266002  | -1.36866843 | 0.00029676  | H    | -5.55530609 | 2.34209768  | -0.00083833 |
| N                                   | 1.40848991  | -1.53536233 | 0.00020258  | H    | 1.85568335  | -5.73635652 | 0.00017634  |
| C                                   | 3.43844826  | -0.14820996 | 0.00038410  | H    | 5.55535097  | -2.34210971 | 0.00054850  |
| C                                   | 2.88019673  | 1.12502405  | 0.00034395  | H    | 5.73638637  | 1.85567712  | 0.00078110  |
| C                                   | 3.63832116  | 2.36962314  | 0.00051796  | H    | 2.34211334  | 5.55532070  | 0.00034051  |
| C                                   | 2.67387490  | 3.42087700  | 0.00038837  | H    | -7.53981465 | -3.53722250 | -0.00069134 |
| C                                   | 1.36869064  | 2.77261500  | 0.00017310  | H    | -8.27008111 | -5.89549785 | -0.00074331 |
| N                                   | 1.53540827  | 1.40843984  | 0.00014799  | H    | -6.58478535 | -7.73245835 | -0.00051386 |
| C                                   | -4.99170812 | -2.64768540 | -0.00043659 | H    | -4.17243869 | -7.20757453 | -0.00023243 |
| C                                   | -5.42331013 | -3.99538502 | -0.00044325 | H    | -3.53723467 | 7.53983376  | -0.00068025 |
| C                                   | -4.44700839 | -5.05955559 | -0.00031219 | H    | -5.89551695 | 8.27007910  | -0.00096976 |
| C                                   | -3.06719158 | -4.74539522 | -0.00017971 | H    | -7.73246195 | 6.58476646  | -0.00116577 |
| C                                   | -2.64767541 | 4.99173409  | -0.00050381 | H    | -7.20755643 | 4.17242483  | -0.00107212 |
| C                                   | -3.99537847 | 5.42332527  | -0.00069437 | H    | 7.53984820  | 3.53724912  | 0.00098452  |
| C                                   | -5.05953987 | 4.44701356  | -0.00080579 | H    | 8.27009497  | 5.89553135  | 0.00103534  |
| C                                   | -4.74536845 | 3.06719924  | -0.00072179 | H    | 6.58478228  | 7.73247650  | 0.00081416  |
| C                                   | 2.64769796  | -4.99172177 | 0.00027526  | H    | 4.17244057  | 7.20756971  | 0.00054284  |
| C                                   | 3.99540101  | -5.42332585 | 0.00041691  | H    | 3.53723710  | -7.53982915 | 0.00038701  |
| C                                   | 5.05956995  | -4.44702555 | 0.00052772  | H    | 5.89551245  | -8.27009693 | 0.00067766  |
| C                                   | 4.74540770  | -3.06720516 | 0.00049531  | H    | 7.73247301  | -6.58480096 | 0.00086541  |
| C                                   | 4.99174766  | 2.64768795  | 0.00066513  | H    | 7.20758770  | -4.17245422 | 0.00076170  |
| C                                   | 5.42334104  | 3.99539441  | 0.00072070  | Zn   | -0.00019414 | 0.00000833  | 0.00000000  |

|   |             |             |             |   |             |             |             |
|---|-------------|-------------|-------------|---|-------------|-------------|-------------|
| C | 4.44703079  | 5.05955427  | 0.00059026  | H | -4.52264452 | 0.19499196  | -0.00056731 |
| C | 3.06721289  | 4.74538103  | 0.00040619  | H | -0.19494229 | -4.52267687 | 0.00007425  |
| C | -6.80602668 | -4.33934883 | -0.00059281 | H | 4.52270457  | -0.19499453 | 0.00050925  |
| C | -7.21156495 | -5.65220617 | -0.00061910 | H | 0.19504422  | 4.52267245  | -0.00001618 |
| C | -6.25140283 | -6.69877452 | -0.00048838 |   |             |             |             |

**Table S32.** Coordinates of the optimized structure for **Zn-THTAP** (meso-substituents are H) at the B3LYP/6-31G(d,p) (for C, N, H) + SDD (for Zn) level of theory.

| E(B3LYP) = -3059.301002             |             |             |             |      |             |             |             |
|-------------------------------------|-------------|-------------|-------------|------|-------------|-------------|-------------|
| Charge = 0, Multiplicity = 1        |             |             |             |      |             |             |             |
| Number of Imaginary Frequencies = 0 |             |             |             |      |             |             |             |
| Atom                                | x           | y           | z           | Atom | x           | y           | z           |
| C                                   | 1.28802092  | -2.81303261 | -0.00007924 | C    | -8.59235492 | -7.81472377 | 0.00035899  |
| C                                   | 2.57313481  | -3.50155012 | -0.00006947 | C    | -7.56841965 | -8.81009982 | 0.00029619  |
| C                                   | 3.57305880  | -2.47290162 | -0.00012911 | C    | -6.24810151 | -8.44794647 | 0.00021103  |
| C                                   | 2.84839770  | -1.20780856 | -0.00012621 | C    | -6.48467337 | 8.26767923  | 0.00054146  |
| N                                   | 1.49619201  | -1.45439894 | -0.00009732 | C    | -7.81470244 | 8.59236805  | 0.00059778  |
| C                                   | 0.04876276  | -3.44226856 | -0.00006292 | C    | -8.81008728 | 7.56844129  | 0.00063314  |
| C                                   | 3.44223932  | 0.04879047  | -0.00018439 | C    | -8.44794504 | 6.24812008  | 0.00061039  |
| C                                   | 2.81299019  | 1.28804407  | -0.00018006 | C    | 6.48467702  | -8.26766340 | -0.00041733 |
| C                                   | 3.50152192  | 2.57315197  | -0.00029658 | C    | 7.81470821  | -8.59234037 | -0.00052087 |
| C                                   | 2.47288368  | 3.57308652  | -0.00020969 | C    | 8.81008506  | -7.56840430 | -0.00057451 |
| C                                   | 1.20778424  | 2.84843946  | -0.00008914 | C    | 8.44793229  | -6.24808680 | -0.00052402 |
| N                                   | 1.45435227  | 1.49623739  | -0.00007440 | H    | -2.17440755 | 5.61972295  | 0.00032939  |
| C                                   | -0.04881897 | 3.44226777  | 0.00003158  | H    | -5.67918199 | 2.01441962  | 0.00045712  |
| C                                   | -1.28805991 | 2.81298810  | 0.00014413  | H    | 5.61970834  | 2.17439297  | -0.00042949 |
| C                                   | -2.57316864 | 3.50153695  | 0.00032064  | H    | 2.01440559  | 5.67916707  | -0.00014624 |
| C                                   | -3.57310194 | 2.47289993  | 0.00035126  | H    | -5.61975237 | -2.17440151 | 0.00016834  |
| C                                   | -2.84843767 | 1.20780018  | 0.00023687  | H    | -2.01442648 | -5.67915278 | -0.00005564 |
| N                                   | -1.49624351 | 1.45435834  | 0.00011479  | H    | -7.31794688 | -3.95332212 | 0.00027119  |
| C                                   | -3.44229684 | -0.04879127 | 0.00021577  | H    | -3.74461247 | -7.42701375 | 0.00005270  |
| C                                   | -2.81303040 | -1.28803678 | 0.00011520  | H    | -3.95331204 | 7.31792804  | 0.00042559  |
| C                                   | -3.50156511 | -2.57315147 | 0.00004538  | H    | -7.42703285 | 3.74462200  | 0.00054864  |
| C                                   | -2.47291789 | -3.57307428 | -0.00001240 | H    | 2.17438704  | -5.61973776 | -0.00006835 |
| C                                   | -1.20782448 | -2.84839603 | -0.00002150 | H    | 5.67913780  | -2.01441233 | -0.00025513 |
| N                                   | -1.45440489 | -1.49619824 | 0.00005693  | H    | 3.95330770  | -7.31793338 | -0.00021978 |
| C                                   | -2.92296218 | 4.83156766  | 0.00035605  | H    | 7.42699989  | -3.74459828 | -0.00040773 |
| C                                   | -4.30008646 | 5.19394572  | 0.00042292  | H    | 7.31791455  | 3.95329744  | -0.00047711 |
| C                                   | -5.31367667 | 4.15127731  | 0.00045610  | H    | 3.74460802  | 7.42701899  | -0.00019350 |
| C                                   | -4.91250116 | 2.78495259  | 0.00041659  | H    | 9.04563715  | 5.72545658  | -0.00051767 |
| C                                   | 4.83155506  | 2.92294951  | -0.00036758 | H    | 9.63407881  | 8.12209902  | -0.00048012 |
| C                                   | 5.19393107  | 4.30007045  | -0.00035369 | H    | 7.84627252  | 9.86007036  | -0.00033894 |
| C                                   | 4.15126182  | 5.31366159  | -0.00026801 | H    | 5.46723147  | 9.20414780  | -0.00023347 |

|   |             |             |             |    |             |             |             |
|---|-------------|-------------|-------------|----|-------------|-------------|-------------|
| C | 2.78494035  | 4.91248827  | -0.00019463 | H  | -9.04565535 | -5.72549664 | 0.00038394  |
| C | -4.83159361 | -2.92295260 | 0.00011960  | H  | -9.63407754 | -8.12214432 | 0.00042678  |
| C | -5.19396165 | -4.30007965 | 0.00014034  | H  | -7.84625644 | -9.86010047 | 0.00031669  |
| C | -4.15128457 | -5.31366095 | 0.00007942  | H  | -5.46722110 | -9.20415706 | 0.00016533  |
| C | -2.78496289 | -4.91247548 | 0.00000488  | H  | -5.72547172 | 9.04565096  | 0.00051226  |
| C | -6.53724433 | -4.71084265 | 0.00022763  | H  | -8.12211421 | 9.63409331  | 0.00061617  |
| C | -6.90059584 | -6.06050368 | 0.00025243  | H  | -9.86008554 | 7.84628697  | 0.00067835  |
| C | -5.86273765 | -7.06940995 | 0.00018845  | H  | -9.20416214 | 5.46724587  | 0.00063508  |
| C | -4.52389529 | -6.66803234 | 0.00010336  | H  | 5.72548177  | -9.04564143 | -0.00037865 |
| C | -4.71083873 | 6.53723163  | 0.00044828  | H  | 8.12212939  | -9.63406283 | -0.00056288 |
| C | -6.06049658 | 6.90059436  | 0.00050885  | H  | 9.86008549  | -7.84624167 | -0.00065604 |
| C | -7.06941169 | 5.86274474  | 0.00054503  | H  | 9.20414277  | -5.46720639 | -0.00056684 |
| C | -6.66804509 | 4.52389885  | 0.00051869  | Zn | 0.00019298  | 0.00000272  | -0.00000002 |
| C | 2.92294000  | -4.83158105 | -0.00010815 | H  | -0.06424726 | 4.52738786  | 0.00005025  |
| C | 4.30006372  | -5.19394696 | -0.00020960 | H  | -4.52741714 | -0.06419895 | 0.00027478  |
| C | 5.31364587  | -4.15126898 | -0.00026747 | H  | 0.06414984  | -4.52738923 | -0.00007362 |
| C | 4.91246256  | -2.78495057 | -0.00022676 | H  | 4.52735978  | 0.06419815  | -0.00025136 |
| C | 4.71082843  | -6.53723115 | -0.00026484 | C  | 5.86272934  | 7.06939666  | -0.00031129 |
| C | 6.06048785  | -6.90058129 | -0.00036804 | C  | 4.52388504  | 6.66803154  | -0.00025227 |
| C | 7.06939508  | -5.86272209 | -0.00042217 | C  | 8.26766552  | 6.48465829  | -0.00045822 |
| C | 6.66801879  | -4.52388131 | -0.00036972 | C  | 8.59235376  | 7.81468667  | -0.00043593 |
| C | 6.53721856  | 4.71082435  | -0.00041113 | C  | 7.56842626  | 8.81007231  | -0.00035478 |
| C | 6.90057991  | 6.06048055  | -0.00039327 | C  | 6.24810564  | 8.44793076  | -0.00029734 |
|   |             |             |             | C  | -8.26767727 | -6.48469189 | 0.00033402  |

**Table S33.** Coordinates of the optimized structure for **Zn-TPP** at the B3LYP/6-31G(d,p) (for C, N, H) + SDD (for Zn) level of theory.

|                                     |             |             |             |      |             |             |             |
|-------------------------------------|-------------|-------------|-------------|------|-------------|-------------|-------------|
| E(B3LYP) = -2139.791147             |             |             |             |      |             |             |             |
| Charge = 0, Multiplicity = 1        |             |             |             |      |             |             |             |
| Number of Imaginary Frequencies = 0 |             |             |             |      |             |             |             |
| Atom                                | x           | y           | z           | Atom | x           | y           | z           |
| C                                   | -2.87583488 | -1.09739757 | -0.02328899 | H    | 6.24741294  | -6.28842466 | -0.01234106 |
| C                                   | -2.86919750 | 1.11475788  | -0.02563822 | H    | 4.73541898  | -6.02208906 | -1.96984266 |
| N                                   | -2.05444061 | 0.00625834  | 0.02464443  | H    | 2.99070848  | -4.26308055 | -1.96104031 |
| C                                   | -2.45651980 | -2.44178592 | 0.00222789  | H    | 3.02315772  | 4.25005663  | -1.95103119 |
| C                                   | -2.44178351 | 2.45652695  | -0.00221875 | H    | 4.78003423  | 5.99698955  | -1.95003083 |
| C                                   | -1.09739541 | 2.87583940  | 0.02332577  | H    | 6.28845482  | 6.24738230  | 0.01225996  |
| C                                   | 1.11474981  | 2.86920975  | 0.02562458  | H    | 6.02208001  | 4.73545058  | 1.96980548  |
| N                                   | 0.00625704  | 2.05444095  | -0.02458504 | H    | 4.26305194  | 2.99076088  | 1.96103765  |
| C                                   | 2.45651293  | 2.44179707  | 0.00219114  | Zn   | 0.00000740  | -0.00000450 | 0.00005468  |
| C                                   | 2.87583141  | 1.09741297  | -0.02331818 | C    | 0.69343047  | 4.24796360  | 0.12915287  |
| C                                   | 2.86920474  | -1.11474367 | -0.02561871 | H    | 1.35500671  | 5.09742316  | 0.20892305  |
| N                                   | 2.05444188  | -0.00624862 | 0.02464162  | C    | -0.66802520 | 4.25206453  | 0.12747778  |

|   |             |             |             |   |             |             |             |
|---|-------------|-------------|-------------|---|-------------|-------------|-------------|
| C | 2.44179139  | -2.45651503 | -0.00219783 | H | -1.32481293 | 5.10535179  | 0.20587217  |
| C | 1.09740397  | -2.87583567 | 0.02333006  | C | -4.24794977 | 0.69343320  | -0.12903959 |
| C | -1.11475323 | -2.86920206 | 0.02565809  | H | -5.09743466 | 1.35500749  | -0.20855803 |
| N | -0.00625524 | -2.05444233 | -0.02457518 | C | -4.25204848 | -0.66802481 | -0.12748655 |
| C | 3.51930901  | 3.49772434  | 0.00476669  | H | -5.10534411 | -1.32479833 | -0.20590434 |
| C | -3.49771860 | 3.51931754  | -0.00480122 | C | -0.69342836 | -4.24795102 | 0.12909071  |
| C | 3.49772628  | -3.51930542 | -0.00479520 | H | -1.35500099 | -5.09742927 | 0.20868867  |
| C | -3.51931029 | -3.49771976 | 0.00478613  | C | 0.66803122  | -4.25205378 | 0.12748498  |
| C | -4.37985694 | -3.64767039 | 1.10415150  | H | 1.32480665  | -5.10535197 | 0.20586376  |
| C | -5.36945851 | -4.63152459 | 1.10747709  | C | 4.24795223  | -0.69341492 | -0.12907870 |
| C | -5.51761470 | -5.48205944 | 0.01020304  | H | 5.09742711  | -1.35498432 | -0.20874062 |
| C | -4.66902054 | -5.34286672 | -1.08973127 | C | 4.25205062  | 0.66804412  | -0.12746134 |
| C | -3.67821494 | -4.36017310 | -1.09182734 | H | 5.10534546  | 1.32482262  | -0.20585383 |
| C | -3.64767851 | 4.37983271  | -1.10419150 | C | 5.36944513  | 4.63151293  | 1.10748970  |
| C | -4.63155004 | 5.36941687  | -1.10754854 | C | 4.37983213  | 3.64767098  | 1.10414976  |
| C | -5.48209543 | 5.51758528  | -0.01028428 | H | -4.26309672 | -2.99076095 | 1.96104210  |
| C | -5.34290318 | 4.66901455  | 1.08966804  | H | -6.02210578 | -4.73547047 | 1.96978248  |
| C | -4.36019496 | 3.67822348  | 1.09179513  | H | -6.28842836 | -6.24740882 | 0.01223608  |
| C | 4.36021134  | -3.67821647 | 1.09179280  | H | -4.77997644 | -5.99700288 | -1.95002769 |
| C | 5.34290392  | -4.66902320 | 1.08966237  | H | -3.02311918 | -4.25005173 | -1.95100052 |
| C | 5.48206431  | -5.51761047 | -0.01028141 | H | -2.99076395 | 4.26305965  | -1.96107636 |
| C | 4.63149882  | -5.36944661 | -1.10753057 | H | -4.73550115 | 6.02204048  | -1.96987111 |
| C | 3.64764473  | -4.37984497 | -1.10417049 | H | -6.24745702 | 6.28838661  | -0.01234141 |
| C | 3.67824150  | 4.36017214  | -1.09184667 | H | -5.99705183 | 4.77997662  | 1.94995416  |
| C | 4.66905793  | 5.34285524  | -1.08973563 | H | -4.25007678 | 3.02314276  | 1.95098034  |
| C | 5.51763264  | 5.48204166  | 0.01021482  | H | 4.25011392  | -3.02312633 | 1.95097380  |
|   |             |             |             | H | 5.99706464  | -4.77998493 | 1.94993930  |

**Table S34.** Coordinates of the optimized structure for **Zn-P** at the B3LYP/6-31G(d,p) (for C, N, Si, H) + SDD (for Zn) level of theory.

| E(B3LYP) = -3154.984956             |             |             |             |      |             |            |             |
|-------------------------------------|-------------|-------------|-------------|------|-------------|------------|-------------|
| Charge = 0, Multiplicity = 1        |             |             |             |      |             |            |             |
| Number of Imaginary Frequencies = 0 |             |             |             |      |             |            |             |
| Atom                                | x           | y           | z           | Atom | x           | y          | z           |
| C                                   | 1.10211775  | -2.87784347 | 0.00287049  | C    | 5.25556359  | 6.85875872 | 1.36902089  |
| C                                   | 0.68553868  | -4.25800871 | 0.00357116  | H    | 4.28467017  | 7.34261284 | 1.22067363  |
| C                                   | -0.67723251 | -4.25992557 | 0.00238291  | H    | 5.23934299  | 6.37087301 | 2.34888876  |
| C                                   | -1.09773740 | -2.88096047 | 0.00099161  | H    | 6.01967998  | 7.64408199 | 1.39733929  |
| N                                   | 0.00102322  | -2.05752950 | 0.00144165  | C    | 5.62312381  | 6.48404027 | -1.68685860 |
| C                                   | 2.44882662  | -2.44570477 | 0.00347965  | H    | 4.65803085  | 6.95965382 | -1.88934782 |
| C                                   | -2.44565795 | -2.45262989 | -0.00051326 | H    | 6.39422142  | 7.26229558 | -1.72187620 |
| C                                   | -2.87776051 | -1.10587015 | -0.00051082 | H    | 5.82320070  | 5.77665046 | -2.49805136 |
| C                                   | -4.25799804 | -0.68933085 | -0.00090893 | C    | -4.85594711 | 7.23406466 | -0.60217254 |

|    |             |             |             |   |             |             |             |
|----|-------------|-------------|-------------|---|-------------|-------------|-------------|
| C  | -4.25985600 | 0.67344976  | -0.00025147 | H | -4.03564639 | 7.55435766  | 0.04856828  |
| C  | -2.88088377 | 1.09397032  | 0.00035358  | H | -4.45726597 | 7.12646494  | -1.61608797 |
| N  | -2.05743523 | -0.00478593 | 0.00020231  | H | -5.60158196 | 8.03721407  | -0.61874474 |
| C  | -2.45259558 | 2.44190178  | 0.00071773  | C | -7.02331670 | 5.08628206  | -1.14863069 |
| C  | -1.10585018 | 2.87403734  | -0.00013997 | H | -6.66010177 | 4.94492549  | -2.17163409 |
| C  | -0.68931949 | 4.25425456  | -0.00137295 | H | -7.47457985 | 4.14408141  | -0.82081036 |
| C  | 0.67346081  | 4.25612730  | -0.00202116 | H | -7.81467043 | 5.84419290  | -1.17499768 |
| C  | 1.09398597  | 2.87717084  | -0.00100893 | C | -6.27868732 | 5.83045609  | 1.76758982  |
| N  | -0.00476603 | 2.05372524  | -0.00005119 | H | -7.05534320 | 6.60316172  | 1.80309951  |
| C  | 2.44190271  | 2.44884135  | -0.00050342 | H | -6.71456374 | 4.89967363  | 2.14470582  |
| C  | 2.87400269  | 1.10208509  | 0.00152796  | H | -5.47913039 | 6.12662067  | 2.45423703  |
| C  | 4.25423003  | 0.68553093  | 0.00352871  | C | 5.10502343  | -7.00872787 | 1.15688966  |
| C  | 4.25613195  | -0.67725908 | 0.00478234  | H | 4.96016810  | -6.64627019 | 2.17967037  |
| C  | 2.87710960  | -1.09773460 | 0.00341395  | H | 4.16506685  | -7.46303924 | 0.82684055  |
| N  | 2.05366229  | 0.00101107  | 0.00173551  | H | 5.86550530  | -7.79756017 | 1.18474104  |
| Zn | -0.00188721 | -0.00190161 | 0.00070636  | C | 5.85326665  | -6.26051844 | -1.75747285 |
| C  | -3.45371628 | -3.46264997 | -0.00237337 | H | 6.62863525  | -7.03457384 | -1.79162662 |
| C  | -4.31885838 | -4.32694700 | -0.00441228 | H | 4.92478464  | -6.69930094 | -2.13688504 |
| Si | -5.62880225 | -5.62215388 | -0.00738512 | H | 6.14829900  | -5.45964519 | -2.44307429 |
| C  | -7.29699453 | -4.78619574 | 0.28913603  | C | 7.24690182  | -4.83422423 | 0.61599908  |
| H  | -7.31432397 | -4.26280282 | 1.25060621  | H | 7.56601380  | -4.01260510 | -0.03365722 |
| H  | -7.52128969 | -4.05563732 | -0.49500707 | H | 7.13576232  | -4.43632647 | 1.62983809  |
| H  | -8.10516911 | -5.52651478 | 0.29655445  | H | 8.05241262  | -5.57727626 | 0.63404269  |
| C  | -5.26287455 | -6.85897753 | 1.37318113  | H | 5.10315661  | -1.34736445 | 0.00702613  |
| H  | -4.29158008 | -7.34315450 | 1.22855555  | H | 5.09941007  | 1.35797733  | 0.00437963  |
| H  | -5.24916516 | -6.36859824 | 2.35184104  | H | 1.34367288  | 5.10304167  | -0.00282073 |
| H  | -6.02702496 | -7.64426525 | 1.40155133  | H | -1.36183573 | 5.09936831  | -0.00220903 |
| C  | -5.62273571 | -6.49213567 | -1.68455876 | H | -5.10679033 | 1.34364608  | -0.00066332 |
| H  | -4.65718849 | -6.96835540 | -1.88342053 | H | -5.10317089 | -1.36178468 | -0.00129915 |
| H  | -6.39381316 | -7.27041729 | -1.71947637 | H | -1.34745360 | -5.10683152 | 0.00283529  |
| H  | -5.82073891 | -5.78683395 | -2.49807514 | H | 1.35814068  | -5.10303167 | 0.00535049  |
| C  | -3.46281938 | 3.44975904  | 0.00242356  |   |             |             |             |
| C  | -4.32781713 | 4.31419941  | 0.00440935  |   |             |             |             |
| C  | 3.45959932  | -3.45301324 | 0.00350531  |   |             |             |             |
| C  | 4.32666967  | -4.31537700 | 0.00305532  |   |             |             |             |
| C  | 3.44996223  | 3.45886372  | -0.00239835 |   |             |             |             |
| C  | 4.31510133  | 4.32316136  | -0.00445871 |   |             |             |             |
| Si | 5.62501615  | 5.61840138  | -0.00743226 |   |             |             |             |
| Si | -5.62697352 | 5.62023530  | 0.00663934  |   |             |             |             |
| Si | 5.63695703  | -5.61024639 | 0.00327601  |   |             |             |             |
| C  | 7.29246768  | 4.78329582  | 0.29556858  |   |             |             |             |
| H  | 7.30728295  | 4.26237903  | 1.25842471  |   |             |             |             |
| H  | 7.51889263  | 4.05072589  | -0.48607895 |   |             |             |             |
| H  | 8.10057511  | 5.52368680  | 0.30322268  |   |             |             |             |

**Table S35.** Coordinates of the optimized structure for *ruf-Zn-TNP* at the B3LYP/6-31G(d,p) (for C, N, Si, H) + SDD (for Zn) level of theory.

| E(B3LYP) = -4384.108908             |             |             |             |      |              |             |             |
|-------------------------------------|-------------|-------------|-------------|------|--------------|-------------|-------------|
| Charge = 0, Multiplicity = 1        |             |             |             |      |              |             |             |
| Number of Imaginary Frequencies = 0 |             |             |             |      |              |             |             |
| Atom                                | x           | y           | z           | Atom | x            | y           | z           |
| Zn                                  | 0.00000000  | 0.00000000  | 0.00000000  | H    | -2.35147822  | 5.45395415  | 0.84700466  |
| Si                                  | -4.96314010 | 4.96298313  | 3.23979396  | H    | -2.35337749  | 7.91572645  | 0.81556080  |
| N                                   | -0.00000366 | 2.05604324  | -0.00002762 | H    | 2.35360536   | 7.91569857  | -0.81492099 |
| C                                   | 1.05976840  | 2.84399057  | -0.37036826 | H    | 1.17849411   | 10.04998429 | -0.40533554 |
| C                                   | -0.67103933 | 4.24611724  | 0.25311297  | H    | -1.17817148  | 10.04998895 | 0.40619265  |
| C                                   | 0.67879090  | 6.66906683  | -0.23747176 | H    | -5.18542399  | 7.42790721  | 3.57007017  |
| C                                   | -2.35060946 | 2.35061671  | 0.69823615  | H    | -3.54122020  | 7.01906450  | 3.06034427  |
| C                                   | 0.67112119  | 4.24612643  | -0.25286485 | H    | -4.85550375  | 7.05851710  | 1.87174636  |
| C                                   | 1.33487267  | 5.44083304  | -0.48025890 | H    | -7.01913356  | 3.54098570  | 3.06013464  |
| C                                   | -0.67861695 | 6.66906683  | 0.23797091  | H    | -7.05889377  | 4.85564011  | 1.87195375  |
| C                                   | -3.22347662 | 3.22346025  | 1.41229446  | H    | -7.42797590  | 5.18500229  | 3.57045684  |
| C                                   | -1.33474606 | 5.44083288  | 0.48062689  | H    | -3.47373185  | 4.72392296  | 5.23517017  |
| C                                   | -1.05975145 | 2.84398421  | 0.37041433  | H    | -5.12730657  | 5.12720820  | 5.72615224  |
| C                                   | -1.32643635 | 7.91865460  | 0.45997561  | H    | -4.72444597  | 3.47354371  | 5.23515096  |
| C                                   | -3.93229836 | 3.93222583  | 2.11498471  | H    | 5.45395547   | -2.35160206 | 0.84664027  |
| C                                   | 1.32666166  | 7.91864720  | -0.45934531 | H    | 5.45395415   | 2.35147822  | -0.84700466 |
| C                                   | 0.67145208  | 9.10526304  | -0.23129399 | H    | 7.91572645   | 2.35337749  | -0.81556080 |
| C                                   | -0.67116692 | 9.10526452  | 0.23204942  | H    | 7.91569857   | -2.35360536 | 0.81492099  |
| C                                   | -4.59940576 | 6.78698085  | 2.90147998  | H    | 10.04998429  | -1.17849411 | 0.40533554  |
| C                                   | -6.78714675 | 4.59923542  | 2.90155358  | H    | 10.04998895  | 1.17817148  | -0.40619265 |
| C                                   | -4.53080077 | 4.53056233  | 5.02634877  | H    | 7.05851710   | 4.85550375  | -1.87174636 |
| Si                                  | 4.96298313  | 4.96314010  | -3.23979396 | H    | 7.01906450   | 3.54122020  | -3.06034427 |
| N                                   | 2.05604324  | 0.00000366  | 0.00002762  | H    | 7.42790721   | 5.18542399  | -3.57007017 |
| C                                   | 2.84399057  | -1.05976840 | 0.37036826  | H    | 4.85564011   | 7.05889377  | -1.87195375 |
| C                                   | 4.24611724  | 0.67103933  | -0.25311297 | H    | 5.18500229   | 7.42797590  | -3.57045684 |
| C                                   | 6.66906683  | -0.67879090 | 0.23747176  | H    | 3.54098570   | 7.01913356  | -3.06013464 |
| C                                   | 2.35061671  | 2.35060946  | -0.69823615 | H    | 5.12720820   | 5.12730657  | -5.72615224 |
| C                                   | 4.24612643  | -0.67112119 | 0.25286485  | H    | 3.47354371   | 4.72444597  | -5.23515096 |
| C                                   | 5.44083304  | -1.33487267 | 0.48025890  | H    | 4.72392296   | 3.47373185  | -5.23517017 |
| C                                   | 6.66906683  | 0.67861695  | -0.23797091 | H    | -5.45395547  | 2.35160206  | 0.84664027  |
| C                                   | 3.22346025  | 3.22347662  | -1.41229446 | H    | -5.45395415  | -2.35147822 | -0.84700466 |
| C                                   | 5.44083288  | 1.33474606  | -0.48062689 | H    | -7.91572645  | -2.35337749 | -0.81556080 |
| C                                   | 2.84398421  | 1.05975145  | -0.37041433 | H    | -7.91569857  | 2.35360536  | 0.81492099  |
| C                                   | 7.91865460  | 1.32643635  | -0.45997561 | H    | -10.04998429 | 1.17849411  | 0.40533554  |
| C                                   | 3.93222583  | 3.93229836  | -2.11498471 | H    | -10.04998895 | -1.17817148 | -0.40619265 |
| C                                   | 7.91864720  | -1.32666166 | 0.45934531  | H    | -7.01906450  | -3.54122020 | -3.06034427 |
| C                                   | 9.10526304  | -0.67145208 | 0.23129399  | H    | -7.05851710  | -4.85550375 | -1.87174636 |
| C                                   | 9.10526452  | 0.67116692  | -0.23204942 | H    | -7.42790721  | -5.18542399 | -3.57007017 |

|    |             |             |             |   |             |              |             |
|----|-------------|-------------|-------------|---|-------------|--------------|-------------|
| C  | 6.78698085  | 4.59940576  | -2.90147998 | H | -5.18500229 | -7.42797590  | -3.57045684 |
| C  | 4.59923542  | 6.78714675  | -2.90155358 | H | -4.85564011 | -7.05889377  | -1.87195375 |
| C  | 4.53056233  | 4.53080077  | -5.02634877 | H | -3.54098570 | -7.01913356  | -3.06013464 |
| Si | -4.96298313 | -4.96314010 | -3.23979396 | H | -5.12720820 | -5.12730657  | -5.72615224 |
| N  | -2.05604324 | -0.00000366 | 0.00002762  | H | -3.47354371 | -4.72444597  | -5.23515096 |
| C  | -2.84399057 | 1.05976840  | 0.37036826  | H | -4.72392296 | -3.47373185  | -5.23517017 |
| C  | -4.24611724 | -0.67103933 | -0.25311297 | H | -2.35160206 | -5.45395547  | -0.84664027 |
| C  | -6.66906683 | 0.67879090  | 0.23747176  | H | 2.35147822  | -5.45395415  | 0.84700466  |
| C  | -2.35061671 | -2.35060946 | -0.69823615 | H | 2.35337749  | -7.91572645  | 0.81556080  |
| C  | -4.24612643 | 0.67112119  | 0.25286485  | H | -2.35360536 | -7.91569857  | -0.81492099 |
| C  | -5.44083304 | 1.33487267  | 0.48025890  | H | -1.17849411 | -10.04998429 | -0.40533554 |
| C  | -6.66906683 | -0.67861695 | -0.23797091 | H | 1.17817148  | -10.04998895 | 0.40619265  |
| C  | -3.22346025 | -3.22347662 | -1.41229446 | H | 4.85550375  | -7.05851710  | 1.87174636  |
| C  | -5.44083288 | -1.33474606 | -0.48062689 | H | 3.54122020  | -7.01906450  | 3.06034427  |
| C  | -2.84398421 | -1.05975145 | -0.37041433 | H | 5.18542399  | -7.42790721  | 3.57007017  |
| C  | -7.91865460 | -1.32643635 | -0.45997561 | H | 7.42797590  | -5.18500229  | 3.57045684  |
| C  | -3.93222583 | -3.93229836 | -2.11498471 | H | 7.05889377  | -4.85564011  | 1.87195375  |
| C  | -7.91864720 | 1.32666166  | 0.45934531  | H | 7.01913356  | -3.54098570  | 3.06013464  |
| C  | -9.10526304 | 0.67145208  | 0.23129399  | H | 5.12730657  | -5.12720820  | 5.72615224  |
| C  | -9.10526452 | -0.67116692 | -0.23204942 | H | 4.72444597  | -3.47354371  | 5.23515096  |
| C  | -6.78698085 | -4.59940576 | -2.90147998 | H | 3.47373185  | -4.72392296  | 5.23517017  |
| C  | -4.59923542 | -6.78714675 | -2.90155358 | C | 1.33474606  | -5.44083288  | 0.48062689  |
| C  | -4.53056233 | -4.53080077 | -5.02634877 | C | 1.05975145  | -2.84398421  | 0.37041433  |
| Si | 4.96314010  | -4.96298313 | 3.23979396  | C | 1.32643635  | -7.91865460  | 0.45997561  |
| N  | 0.00000366  | -2.05604324 | -0.00002762 | C | 3.93229836  | -3.93222583  | 2.11498471  |
| C  | -1.05976840 | -2.84399057 | -0.37036826 | C | -1.32666166 | -7.91864720  | -0.45934531 |
| C  | 0.67103933  | -4.24611724 | 0.25311297  | C | -0.67145208 | -9.10526304  | -0.23129399 |
| C  | -0.67879090 | -6.66906683 | -0.23747176 | C | 0.67116692  | -9.10526452  | 0.23204942  |
| C  | 2.35060946  | -2.35061671 | 0.69823615  | C | 4.59940576  | -6.78698085  | 2.90147998  |
| C  | -0.67112119 | -4.24612643 | -0.25286485 | C | 6.78714675  | -4.59923542  | 2.90155358  |
| C  | -1.33487267 | -5.44083304 | -0.48025890 | C | 4.53080077  | -4.53056233  | 5.02634877  |
| C  | 0.67861695  | -6.66906683 | 0.23797091  | H | 2.35160206  | 5.45395547   | -0.84664027 |
| C  | 3.22347662  | -3.22346025 | 1.41229446  |   |             |              |             |

## 20. References

1. G. W. T. M. J. Frisch, H. B. Schlegel, G. E. Scuseria, M. A. Robb, J. R. Cheeseman, G. Scalmani, V. Barone, G. A. Petersson, H. Nakatsuji, X. Li, M. Caricato, A. Marenich, J. Bloino, B. G. Janesko, R. Gomperts, B. Mennucci, H. P. Hratchian, J. V. Ortiz, A. F. Izmaylov, J. L. Sonnenberg, D. Williams-Young, F. Ding, F. Lipparini, F. Egidi, J. Goings, B. Peng, A. Petrone, T. Henderson, D. Ranasinghe, V. G. Zakrzewski, J. Gao, N. Rega, G. Zheng, W. Liang, M. Hada, M. Ehara, K. Toyota, R. Fukuda, J. Hasegawa, M. Ishida, T. Nakajima, Y. Honda, O. Kitao, H. Nakai, T. Vreven, K. Throssell, J. A. Montgomery, Jr., J. E. Peralta, F. Ogliaro, M. Bearpark, J. J. Heyd, E. Brothers, K. N. Kudin, V. N. Staroverov, T. Keith, R. Kobayashi, J. Normand, K. Raghavachari, A. Rendell, J. C. Burant, S. S. Iyengar, J. Tomasi, M. Cossi, J. M. Millam, M. Klene, C. Adamo, R. Cammi, J. W. Ochterski, R. L. Martin, K. Morokuma, O. Farkas, J. B. Foresman, and D. J. Fox, Gaussian 09, Revision D.01, *Gaussian, Inc., Wallingford CT*, 2009.
2. Z. Chen, C. S. Wannere, C. Corminboeuf, R. Puchta and P. v. R. Schleyer, Nucleus-Independent Chemical Shifts (NICS) as an Aromaticity Criterion, *Chem. Rev.*, 2005, **105**, 3842-3888.
3. T. Lu and F. Chen, Multiwfn: A multifunctional wavefunction analyzer, *J. Comput. Chem.*, 2012, **33**, 580-592.
4. S. Klod and E. Kleinpeter, Ab initio calculation of the anisotropy effect of multiple bonds and the ring current effect of arenes—application in conformational and configurational analysis, *J. Chem. Soc., Perkin Trans. 2*, 2001, 1893-1898.
5. Z. Liu, T. Lu and Q. Chen, An sp-hybridized all-carboatomic ring, cyclo[18]carbon: Electronic structure, electronic spectrum, and optical nonlinearity, *Carbon*, 2020, **165**, 461-467.
6. W. Humphrey, A. Dalke and K. Schulten, VMD: Visual molecular dynamics, *J. Mol. Graph.*, 1996, **14**, 33-38.
7. D. Geuenich, K. Hess, F. Köhler and R. Herges, Anisotropy of the Induced Current Density (ACID), a General Method To Quantify and Visualize Electronic Delocalization, *Chem. Rev.*, 2005, **105**, 3758-3772.
8. J. Jusélius, D. Sundholm and J. Gauss, Calculation of current densities using gauge-including atomic orbitals, *J. Chem. Phys.*, 2004, **121**, 3952-3963.
9. H. Fliegl, J. Jusélius and D. Sundholm, Gauge-Origin Independent Calculations of the Anisotropy of the Magnetically Induced Current Densities, *J. Phys. Chem. A*, 2016, **120**, 5658-5664.
10. H. Fliegl, S. Taubert, O. Lehtonen and D. Sundholm, The gauge including magnetically induced current method, *Phys. Chem. Chem. Phys.*, 2011, **13**, 20500-20518.
11. F. Neese, The ORCA program system, *WIREs Comput. Mol. Sci.*, 2012, **2**, 73-78.
12. F. Neese, Software update: The ORCA program system—Version 5.0, *WIREs Comput. Mol. Sci.*, 2022, **12**, e1606.
13. D. K. Roper, W. Ahn and M. Hoepfner, Microscale Heat Transfer Transduced by Surface Plasmon Resonant Gold Nanoparticles, *J. Phys. Chem. C*, 2007, **111**, 3636-3641.
14. H. Gao, X. Zhi, F. Wu, Y. Zhao, F. Cai, P. Li and Z. Shen, Molecular Engineering of Corrole Radicals by Polycyclic Aromatic Fusion: Towards Open-Shell Near-Infrared Materials for Efficient Photothermal Therapy, *Angew. Chem. Int. Ed.*, 2023, **62**, e202309208.
